# Supplementary material for: Phosphonium acidic ionic liquid: an efficient and recyclable homogeneous catalyst for the synthesis of 2-arylbenzoxazoles, 2-arylbenzimidazoles, and 2-arylbenzothiazoles
Source: Royal Society of Chemistry journal article supplement (doi:10.1039/c8ra01709c), 2018-01-01
Supplement: c8ra01709c1.pdf [file c8ra01709c1.pdf]

Supporting Information

For

**Phosphonium acidic ionic liquid: an efficient and recyclable homogeneous catalyst for the synthesis of 2-arylbenzoxazoles, 2-arylbenzimidazoles, and 2-arylbenzothiazoles**

**Quang The Nguyen,<sup>a</sup> Anh-Hung Thi Hang,<sup>a</sup> Thuy-Linh Ho Nguyen,<sup>a,b</sup> Duy-Khiem Nguyen Chau,<sup>a</sup> Phuong Hoang Tran<sup>a\*</sup>**

*Department of Organic Chemistry, Faculty of Chemistry, University of Science, Vietnam National University - Ho Chi Minh City, 721337, Viet Nam.*

*Center for Innovative Materials and Architectures, Vietnam National University – Ho Chi Minh City, 721337, Viet Nam.*

\*To whom correspondence should be addressed: thphuong@hcmus.edu.vn (Phuong Hoang Tran)

**Table of Contents**

|                                                                      |                |
|----------------------------------------------------------------------|----------------|
| <b>Section S1. Materials and analytical techniques</b>               | <b>S2</b>      |
| <b>Section S2. Hammett acidity function test</b>                     | <b>S2-S3</b>   |
| <b>Section S3. Optimization of the catalyst</b>                      | <b>S4-S5</b>   |
| <b>Section S4. Spectral data</b>                                     | <b>S6-S29</b>  |
| <b>Section S5. <sup>1</sup>H and <sup>13</sup>C NMR spectroscopy</b> | <b>S30-S75</b> |
| <b>Section S5. References</b>                                        | <b>S76</b>     |

## Section S1. Materials and analytical techniques

### Chemicals and supplies

1,4-butansultone ( $\geq 99\%$ ), triphenylphosphine ( $\geq 99\%$ ), *p*-toluenesulfonic acid ( $\geq 99\%$ ), benzaldehyde ( $\geq 99\%$ ), 4-methylbenzaldehyde ( $\geq 97\%$ ), 4-*tert*-butylbenzaldehyde ( $\geq 98\%$ ), 4-methoxybenzaldehyde ( $\geq 98\%$ ), 4-fluorobenzaldehyde ( $\geq 98\%$ ), 4-chlorobenzaldehyde ( $\geq 97\%$ ), 4-bromobenzaldehyde ( $\geq 99\%$ ), 4-nitrobenzaldehyde ( $\geq 98\%$ ), 4-pyridinecarboxaldehyde ( $\geq 97\%$ ), 3-fluorobenzaldehyde ( $\geq 97\%$ ), 3-bromobenzaldehyde ( $\geq 97\%$ ), 3-chlorobenzaldehyde ( $\geq 97\%$ ), 2-fluorobenzaldehyde ( $\geq 97\%$ ), 2-bromobenzaldehyde ( $\geq 98\%$ ), 2-aminophenol ( $\geq 99\%$ ), 2-amino-4-chlorophenol ( $\geq 97\%$ ), 2-amino-4-methylphenol ( $\geq 97\%$ ), 2-aminothiophenol ( $\geq 99\%$ ), *o*-phenylenediamine ( $\geq 99.5\%$ ), 4-nitro-*o*-phenylenediamine ( $\geq 98\%$ ) were obtained from Sigma-Aldrich.

Silica gel 230 – 400 mesh for flash chromatography was obtained from HiMedia Laboratories Pvt. Ltd. (India). TLC (silica gel 60 F<sub>254</sub>) was purchased from Merck. Ethyl acetate (purity  $\geq 99.5\%$ ) and hexanes ( $\geq 95\%$ ) were obtained from Xilong Chemical Co., Ltd (China). Chloroform-*d*, 99.8 Atom % D, stab. with Ag was obtained from Armar (Switzerland).

All starting materials, reagents, and solvents were used without further purification.

### Analytical techniques

GC–MS spectra were carried out on an Agilent GC System 7890 equipped with a mass selective detector Agilent 5973N and a capillary DB–5MS column (30 m x 250  $\mu$ m x 0.25  $\mu$ m). FT-IR spectra were recorded from KBr pellets by using a Bruker Vertex 70. <sup>1</sup>H and <sup>13</sup>C-NMR spectra were investigated on a Bruker Advance II 500 MHz. Hammett acidity function of catalyst was investigated by JASCO V-670 UV-Vis spectrophotometer.

## Section S2. Hammett acidity function test

The acidity of various solutions of Brønsted-acidic IL was determined using UV/Vis spectroscopy with 4-nitrodiphenylamine (Sigma-Aldrich,  $\geq 98\%$ ) as the indicator. The anhydrous IL was dried by heating *in vacuo* at 90 °C in hour in a glove box. Under inert atmosphere, to a series of IL solutions in DI water at given concentrations were added 4-nitrodiphenylamine as the indicator whose concentration in the final solutions is constant at  $5.10^{-3}$  mol.L<sup>-1</sup>. These resulting two-component solutions were shaken for 30 min and then analyzed for the variation in the absorption curves of 4-nitrodiphenylamine at the wavelength region from 350 to 500 nm (**Figure S1**). The experimental data are summarized in **Figure S1** and **Table S1**.

The reported Hammett acidity function values ( $H_0$ ) were calculated on the basis of the following equation:  $H_0 = pK_a(\text{InH}^+) + \log([\text{In}]/[\text{InH}^+])$ , wherein  $pK_a(\text{InH}^+)$  is the  $pK_a$  value corresponding to the protonated form of 4-nitrodiphenylamine (-2.38),  $[\text{In}]$  and  $[\text{InH}^+]$  are the molar concentrations of the protonated and unprotonated forms of 4-nitrodiphenylamine indicator, respectively.

Based on the UV spectra of **Figure S1**, the quantitative data of  $H_0$  values were obtained in the **Table S1**. The corresponding  $H_0$  values of 5%, 6%, 7%, and 10% IL solutions were -1.40, -1.46, -1.78, and - 1.96, respectively (**Table S1**).

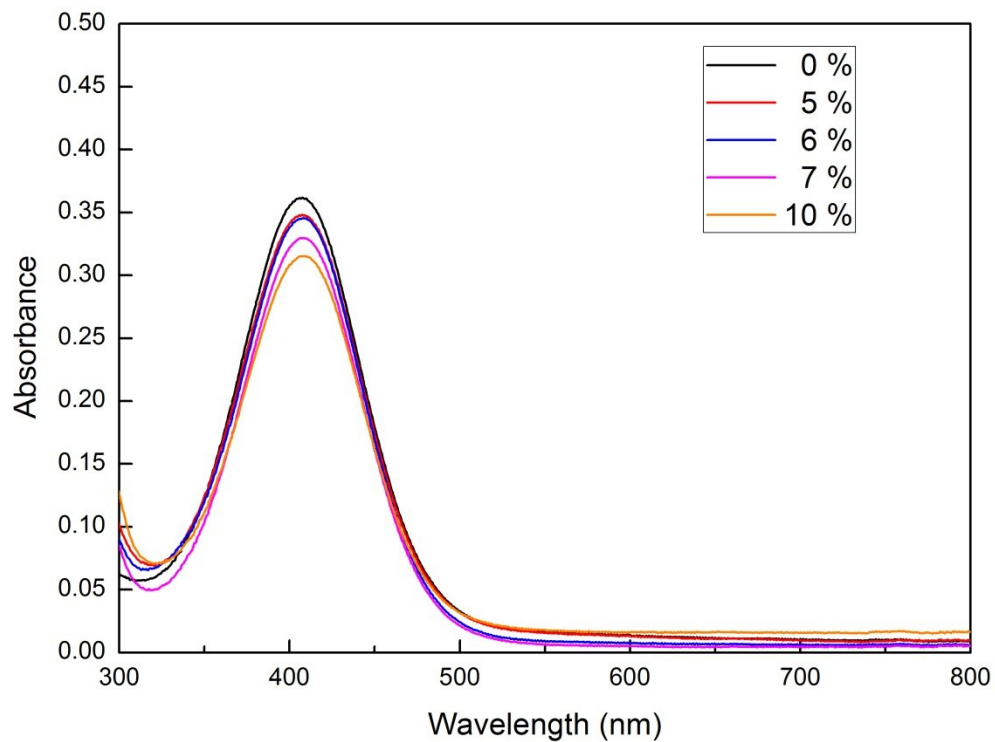

**Figure S1.** The UV/Vis spectra of 4-nitrodiphenylamine indicator measured in its cosolutions with IL at different concentration.

**Table S1.** Hammett function values of various concentrations of IL.

| The concentration of catalyst (mol%) | $A_{\max}$ | [In] (%) | [InH <sup>+</sup> ] (%) | $H_0$ |
|--------------------------------------|------------|----------|-------------------------|-------|
| 0                                    | 0.361      | 100      | 0                       |       |
| 5                                    | 0.347      | 96.20    | 3.80                    | -1.40 |
| 6                                    | 0.345      | 95.59    | 4.41                    | -1.46 |
| 7                                    | 0.329      | 91.22    | 8.78                    | -1.78 |
| 10                                   | 0.315      | 87.28    | 12.72                   | -1.96 |

## Section S3. Optimization of the catalyst.

**Table S2.** The screening of catalyst for the synthesis of 2-phenylbenzoxazole

Reaction scheme: 2-aminophenol + benzaldehyde (CHO)  $\xrightarrow[100\text{ }^\circ\text{C, 30 min, solvent-free}]{\text{Catalyst (7 mol\%)}}$  2-phenylbenzoxazole

| Entry | Type                          | Catalysts                             | Yield (%) |
|-------|-------------------------------|---------------------------------------|-----------|
| 1     | Homogeneous salts             | CuCl <sub>2</sub>                     | 15        |
| 2     |                               | AlCl <sub>3</sub>                     | 18        |
| 3     |                               | FeCl <sub>3</sub>                     | 17        |
| 4     |                               | FeSO <sub>4</sub>                     | 10        |
| 5     | Heterogenous oxides           | Fe <sub>2</sub> O <sub>3</sub>        | 7         |
| 6     |                               | MgO                                   | 5         |
| 7     |                               | TiO <sub>2</sub>                      | 10        |
| 8     |                               | Al <sub>2</sub> O <sub>3</sub>        | 15        |
| 9     |                               | CuO                                   | 5         |
| 10    | Brønsted acids                | HCl                                   | 20        |
| 11    |                               | H <sub>2</sub> SO <sub>4</sub>        | 45        |
| 12    |                               | TsOH                                  | 48        |
| 13    |                               | CH <sub>3</sub> COOH                  | 10        |
| 14    | Brønsted acidic ionic liquids | [MIM]HSO <sub>4</sub>                 | 20        |
| 15    |                               | [1-methylpyrrolidine]HSO <sub>4</sub> | 17        |
| 16    |                               | [BMIM][BF <sub>6</sub> ]              | 5         |
| 17    | Lewis acidic ionic liquid     | [EMIM]FeCl <sub>4</sub>               | 10        |

<sup>a</sup>Reaction conditions: 2-aminophenol (1 mmol), benzaldehyde (1 mmol), catalyst (7 mol%) in solvent-free condition at 100 °C for 30 min.

<sup>b</sup>Yield of pure compound was isolated by column chromatography (acetone/petroleum ether).

## Section S4. Spectral data

### Triphenyl(butyl-4-sulphonyl)phosphonium toluenesulfonate<sup>1</sup>

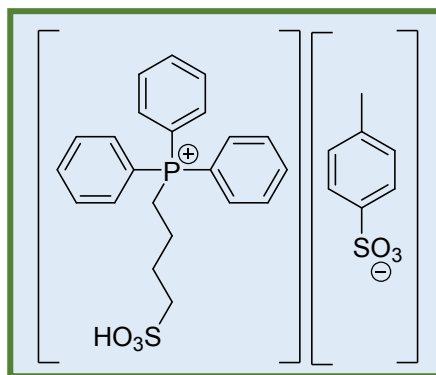

**IR** (KBr, 4000 – 400 cm<sup>-1</sup>) 3450, 3075, 2950, 1600, 1486, 1410, 1175, 1121, 1034.

**<sup>1</sup>H NMR** (500 MHz, D<sub>2</sub>O) δ 7.76 – 7.73 (m, 3H), 7.65 – 7.73 (m, 6H), 7.62 – 7.56 (m, 14), 7.23 (d, *J* = 8.0 Hz, 3H), 3.33 – 3.17 (m, 2H), 2.78 (t, *J* = 7.5 Hz, 2H), 2.27 (s, 3H), 1.85 – 1.79 (m, 2H), 1.75 – 1.67 (m, 2H) ppm.

**<sup>13</sup>C NMR** (125 MHz, D<sub>2</sub>O) δ 142.43, 139.48, 135.02 (d, *J* = 2.5 Hz), 133.51 (d, *J* = 10.0), 130.08 (d, *J* = 12.5 Hz), 129.42, 125.37, 118.33, 49.93, 25.13 (d, *J* = 17.5 Hz), 21.22 (d, *J* = 51.2 Hz), 20.73 (d, *J* = 3.8 Hz), 20.48 ppm.

## Characterization of 2-arylbenzoxazoles

### 2-Phenylbenzoxazole<sup>2-5</sup>

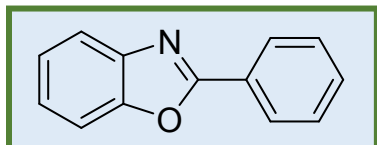

Analytical TLC on silica gel, 1/19 acetone/petroleum ether.

White solid, mp = 102-103 °C.

**FT-IR** (KBr, 4000 – 400 cm<sup>-1</sup>): 3059, 2925, 2854, 1775, 1615, 1551, 1475, 1448, 1285, 1240.

**<sup>1</sup>H NMR** (500 MHz, CDCl<sub>3</sub>): δ 8.31 – 8.22 (m, 2H), 7.82 – 7.75 (m, 1H), 7.61 – 7.56 (m, 1H), 7.55 – 7.50 (m, 3H), 7.40 – 7.33 (m, 2H) ppm.

**<sup>13</sup>C NMR** (125 MHz, CDCl<sub>3</sub>) δ 163.2, 150.9, 142.2, 131.7, 129.0, 127.8, 127.3, 125.3, 124.7, 120.1, 110.7 ppm.

**GC-MS** (EI, 70 eV) *m/z*: 195 ([M]<sup>+</sup>).

### 2-(4-Methylphenyl)benzoxazole<sup>5</sup>

Analytical TLC on silica gel, 1/19 acetone/petroleum ether.

White solid, mp = 113-114 °C.

**FT-IR** (KBr, 4000 – 400 cm<sup>-1</sup>): 3056, 2920, 2854, 1728, 1620, 1554, 1499, 1450, 1242.

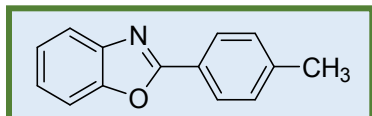

**<sup>1</sup>H NMR** (500 MHz, CDCl<sub>3</sub>) δ 8.16 – 8.14 (m, 2H), 7.77 – 7.74 (m, 1H), 7.58 – 7.55 (m, 1H), 7.36 – 7.32 (m, 4H), 2.44 (s, 3H) ppm.

**<sup>13</sup>C NMR** (125 MHz, CDCl<sub>3</sub>) δ 163.5, 150.8, 142.3, 142.2, 129.8, 127.8, 125.1, 124.7, 124.5, 120.0, 110.6, 21.8 ppm.

**GC-MS** (EI, 70 eV) *m/z*: 209 ([M]<sup>+</sup>).

### 2-(4-*Tert*-butylphenyl)benzoxazole<sup>3</sup>

Analytical TLC on silica gel, 1/19 acetone/petroleum ether.

White solid, mp = 107-108 °C.

**FT-IR** (KBr, 4000 – 400 cm<sup>-1</sup>): 3059, 2927, 1728, 1547, 1452, 1429, 1287, 1239.

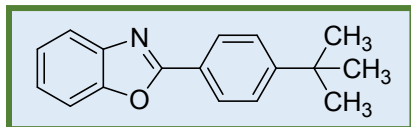

**<sup>1</sup>H NMR** (500 MHz, CDCl<sub>3</sub>) δ 8.20 – 8.18 (m, 2H), 7.75 – 7.78 (m, 1H), 7.59 – 7.57 (m, 1H), 7.56 – 7.54 (m, 2H), 7.36 – 7.32 (m, 2H), 1.38 (s, 9H) ppm.

**<sup>13</sup>C NMR** (125 MHz, CDCl<sub>3</sub>) δ 163.4, 155.4, 150.8, 142.1, 127.7, 126.1, 125.1, 124.7, 124.4, 120.0, 110.7, 35.2, 31.3 ppm.

**GC-MS** (EI, 70 eV) *m/z*: 251 ([M]<sup>+</sup>).

### 2-(4-Methoxyphenyl)benzoxazole<sup>5</sup>

Analytical TLC on silica gel, 1/19 acetone/petroleum ether.

White solid, mp = 103-104 °C.

**FT-IR** (KBr, 4000 – 400 cm<sup>-1</sup>): 3050, 2924, 2849, 1615, 1501, 1450, 1420, 1244.

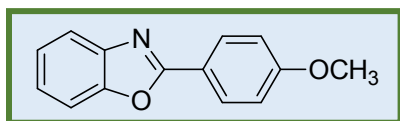

**<sup>1</sup>H NMR** (500 MHz, CDCl<sub>3</sub>) δ 8.22 – 8.18 (m, 2H), 7.75 – 7.73 (m, 1H), 7.56 – 7.54 (m, 1H), 7.35 – 7.30 (m, 2H), 7.04 – 7.01 (m, 2H), 3.89 (s, 3H) ppm.

**<sup>13</sup>C NMR** (125 MHz, CDCl<sub>3</sub>) δ 163.3, 162.6, 150.8, 142.1, 129.7, 124.8, 124.7, 119.7, 119.7, 114.6, 110.6, 55.6 ppm.

**GC-MS** (EI, 70 eV) *m/z*: 225 ([M]<sup>+</sup>).



### 2-(4-Nitrophenyl)benzoxazole<sup>5</sup>

Analytical TLC on silica gel, 1/19 acetone/petroleum ether.

Yellow solid, mp = 256 - 257 °C.

**FT-IR** (KBr, 4000 – 400 cm<sup>-1</sup>): 2925, 2854, 1678, 1610, 1534, 1449, 1237.

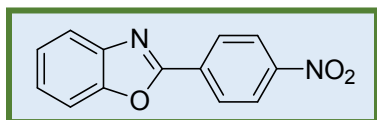

**<sup>1</sup>H NMR** (500 MHz, CDCl<sub>3</sub>)  $\delta$  8.15 (dd,  $J$  = 8.0, 1.0 Hz, 1H), 7.89 (dd,  $J$  = 8.0, 1.0 Hz, 1H), 7.83 – 7.80 (m, 1H), 7.74 (td,  $J$  = 8.0, 1.0 Hz, 1H), 7.69 (td,  $J$  = 8.0, 1.0 Hz, 1H), 7.59 – 7.57 (m, 1H), 7.42 – 7.37 (m, 2H) ppm.

**<sup>13</sup>C NMR** (125 MHz, CDCl<sub>3</sub>)  $\delta$  158.9, 151.2, 141.7, 132.4, 132.0, 131.6, 126.2, 125.1, 124.3, 120.9, 111.1 ppm.

**GC-MS** (EI, 70 eV)  $m/z$ : 240 ([M]<sup>+</sup>).

### 2-(4-Fluorophenyl)benzoxazole<sup>3</sup>

Analytical TLC on silica gel, 1/19 acetone/petroleum ether.

White solid, mp = 99 - 99.5 °C.

**FT-IR** (KBr, 4000 – 400 cm<sup>-1</sup>): 3061, 2925, 1619, 1584, 1582, 1542, 1473, 1448, 1247, 1225.

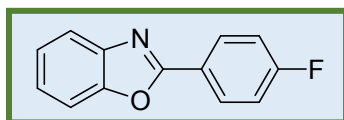

**<sup>1</sup>H NMR** (500 MHz, CDCl<sub>3</sub>)  $\delta$  8.27 – 8.23 (m, 2H), 7.78 – 7.74 (m, 1H), 7.58 – 7.55 (m, 1H), 7.37 – 7.33 (m, 2H), 7.23 – 7.18 (m, 2H) ppm.

**<sup>13</sup>C NMR** (125 MHz, CDCl<sub>3</sub>)  $\delta$  165.0 (d,  $J$  = 251 Hz), 162.3, 150.9, 142.2, 130.0 (d,  $J$  = 8.8 Hz), 130.0 (d,  $J$  = 255.1 Hz), 125.0 (d,  $J$  = 59.5 Hz), 123.7 (d,  $J$  = 3.3 Hz), 120.1, 116.3 (d,  $J$  = 22 Hz), 110.7 ppm.

**GC-MS** (EI, 70 eV)  $m/z$ : 213 ([M]<sup>+</sup>)

### 2-(4-Chlorophenyl)benzoxazole<sup>5</sup>

Analytical TLC on silica gel, 1/19 acetone/petroleum ether.

White solid, mp = 146 - 147.5 °C.

**FT-IR** (KBr, 4000 – 400 cm<sup>-1</sup>): 3061, 2925, 1610, 1584, 1582, 1542, 1473, 1448, 1247, 1225.

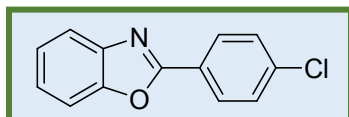

**<sup>1</sup>H NMR** (500 MHz, acetone-*d*<sub>6</sub>) δ 8.26 – 8.23 (m, 2H), 8.27 – 8.22 (m, 2H), 7.77 (m, 1H), 7.71–7.69 (m, 1H), 7.65 – 7.63 (m, 2H), 7.46 – 7.39 (m, 2H) ppm.

**<sup>13</sup>C NMR** (125 MHz, acetone-*d*<sub>6</sub>) δ 161.7, 150.8, 142.1, 137.2, 129.3, 129.0, 125.9, 125.59, 124.8, 120.0, 110.7 ppm.

**GC-MS** (EI, 70 eV) *m/z*: 229 ([M]<sup>+</sup>).

### 2-(3-Fluorophenyl)benzoxazole<sup>3</sup>

Analytical TLC on silica gel, 1/19 acetone/petroleum ether.

White solid, mp = 99-100 °C.

**FT-IR** (KBr, 4000 – 400 cm<sup>-1</sup>): 3073, 2925, 2855, 1591, 1552, 1480, 1448, 1341, 1269, 1242.

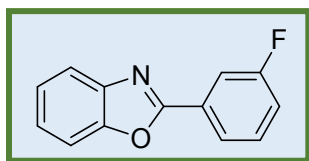

**<sup>1</sup>H NMR** (500 MHz, CDCl<sub>3</sub>): δ 8.05 – 8.04 (m, 1H), 7.96 – 7.94 (m, 1H), 7.79 – 7.77 (m, 1H), 7.59-7.58 (m, 1H), 7.51-7.47 (m, 1H), 7.38 – 7.36 (m, 2H), 7.25 – 7.21 (m, 1H) ppm.

**<sup>13</sup>C NMR** (125 MHz, CDCl<sub>3</sub>) δ 163.0 (d, *J* = 245.5 Hz), 150.9, 142.1, 130.8 (d, *J* = 8.1 Hz), 129.3 (d, *J* = 8.5 Hz), 125.6, 124.9, 123.5 (d, *J* = 3 Hz), 120.4, 118.7, 118.6 (d, *J* = 21.3 Hz), 114.7 (d, *J* = 23.9 Hz), 110.8 ppm.

**GC-MS** (EI, 70 eV) *m/z*: 213 ([M]<sup>+</sup>)

## 2-(3-Bromophenyl)benzoxazole<sup>4</sup>

Analytical TLC on silica gel, 1/19 acetone/petroleum ether.

White solid, mp = 129-130 °C.

**FT-IR** (KBr, 4000 – 400 cm<sup>-1</sup>): 3423, 3055, 2926, 1613, 1570, 1545, 1451, 1426, 1287, 1240.

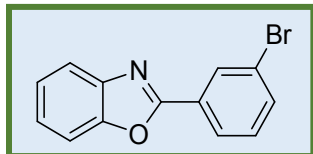

**<sup>1</sup>H NMR**: (500 MHz, CDCl<sub>3</sub>): δ 8.42 (t, *J* = 1.5 Hz, 1H), 8.20 – 8.18 (m, 1H), 7.79 – 7.77 (m, 1H), 7.67 (m, 1H), 7.66 – 7.65 (m, 1H), 7.42 – 7.37 (m, 3H) ppm.

**<sup>13</sup>C NMR** (125 MHz, CDCl<sub>3</sub>): δ 161.7, 151.0, 142.0, 134.6, 130.7, 130.6, 129.2, 126.3, 125.7, 125.0, 123.2, 120.4, 110.9 ppm.

**GC-MS** (EI, 70 eV) *m/z*: 273 ([M]<sup>+</sup>)

## 2-(2-Fluorophenyl)benzoxazole<sup>6</sup>

Analytical TLC on silica gel, 1/19 acetone/petroleum ether.

White solid, mp = 93-95 °C.

**FT-IR** (KBr, 4000 – 400 cm<sup>-1</sup>): 3061, 2925, 1719, 1584, 1582, 1542, 1473, 1448, 1247, 1225.

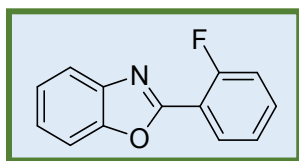

**<sup>1</sup>H NMR** (500 MHz, CDCl<sub>3</sub>) δ 8.24 (td, *J* = 7.5, 2.0 Hz, 1H), 7.85 – 7.81 (m, 1H), 7.63 – 7.59 (m, 1H), 7.54 – 7.49 (m, 1H), 7.41 – 7.36 (m, 2H), 7.32 – 7.25 (m, 2H) ppm.

**<sup>13</sup>C NMR** (125 MHz, CDCl<sub>3</sub>): δ 162.0 (s), 156.0 (s), 150.7 (s), 141.9 (s), 133.25 (d, *J* = 8.6 Hz), 130.7 (d, *J* = 1.1 Hz), 125.6 (s), 124.8 (s), 124.63 (d, *J* = 3.8 Hz), 120.52 (s), 117.32 (d, *J* = 21.3 Hz), 115.7 (d, *J* = 10.4 Hz), 110.8 (s) ppm.

**GC-MS** (EI, 70 eV) *m/z*: 213 ([M]<sup>+</sup>)

## 2-(2-Chlorophenyl)benzoxazole<sup>7</sup>

Analytical TLC on silica gel, 1/19 acetone/petroleum ether.

White solid, mp = 100-102 °C.

**FT-IR** (KBr, 4000 – 400 cm<sup>-1</sup>): 2925, 1608, 1584, 1569, 1533, 1470, 1452, 1343, 1237, 1185.

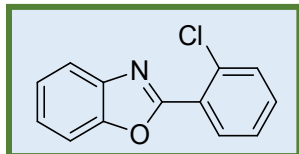

**<sup>1</sup>H NMR** (500 MHz, CDCl<sub>3</sub>): δ 8.16 – 8.14 (m, 1H), 7.87 – 7.84 (m, 1H), 7.64 – 7.61 (m, 1H), 7.58 – 7.56 (m, 1H), 7.47 – 7.37 (m, 4H) ppm.

**<sup>13</sup>C NMR** (125 MHz, CDCl<sub>3</sub>): δ 161.1, 150.8, 141.8, 133.7, 132.1, 132.0, 131.5, 127.1, 126.5, 125.7, 124.8, 120.7, 110.9 ppm.

**GC-MS** (EI, 70 eV) *m/z*: 229 ([M]<sup>+</sup>).

## 2-(2-Hydroxyphenyl)benzoxazole<sup>4</sup>

Analytical TLC on silica gel, 1/19 acetone/petroleum ether.

White solid, mp = 120-122 °C.

**FT-IR** (KBr, 4000 – 400 cm<sup>-1</sup>): 2921, 2851, 1630, 1587, 1543, 1487, 1452, 1244, 1155.

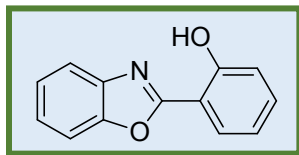

**<sup>1</sup>H NMR** (500 MHz, CDCl<sub>3</sub>): δ 8.04 (dd, *J* = 8.0, 1.5 Hz, 1H), 7.74 (m, 1H), 7.63 – 7.60 (m, 1H), 7.47 – 7.42 (m, 1H), 7.41 – 7.37 (m, 2H), 7.13 (d, *J* = 8.5 Hz, 1H), 7.03 – 7.00 (m, 1H) ppm.

**<sup>13</sup>C NMR** (125 MHz, CDCl<sub>3</sub>): δ 133.72, 127.29, 125.54, 125.17, 119.72, 119.43, 117.59, 110.82 ppm.

**GC-MS** (EI, 70 eV) *m/z*: 213 ([M]<sup>+</sup>).

## 2-(Pyridine-4-yl)benzoxazole<sup>8</sup>

Analytical TLC on silica gel, 1/19 acetone/petroleum ether.

White solid, mp = 102-104°C.

**FT-IR** (KBr, 4000 – 400 cm<sup>-1</sup>): 3460, 2946, 1628, 878.

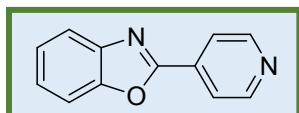

**<sup>1</sup>H NMR** (500 MHz, CDCl<sub>3</sub>): δ 8.82 (d, *J* = 5.5 Hz, 2H), 8.09 (d, *J* = 6.0 Hz, 2H), 7.84 – 7.80 (m, 1H), 7.63 (m, 1H), 7.42 (m, 2H) ppm.

**<sup>13</sup>C NMR** (125 MHz, CDCl<sub>3</sub>): δ 161.0, 151.1, 150.9, 141.9, 134.6, 126.5, 125.3, 121.2, 120.9, 111.1 ppm.

**GC-MS** (EI, 70 eV) *m/z*: 196 ([M]<sup>+</sup>).

## 5-Methyl-2-phenylbenzoxazole<sup>3</sup>

Analytical TLC on silica gel, 1/19 acetone/petroleum ether.

White solid, mp = 112-115 °C.

**FT-IR** (KBr, 4000 – 400 cm<sup>-1</sup>): 3422, 2922, 2869, 1647, 1550, 1474, 1334, 1261.

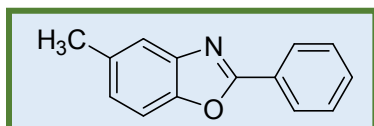

**<sup>1</sup>H NMR** (500 MHz, acetone-*d*<sub>6</sub>) δ 8.25 – 8.23 (m, 2H), 7.62 – 7.59 (m, 3H), 7.57 – 7.56 (m, 2H), 7.24 (d, *J* = 8.5, 1H), 2.47 (s, 3H) ppm.

**<sup>13</sup>C NMR** (125 MHz, CDCl<sub>3</sub>): δ 163.3, 149.2, 142.5, 134.5, 131.5, 129.0, 127.7, 127.5, 126.4, 120.1, 110.1, 21.6 ppm.

**GC-MS** (EI, 70 eV) *m/z*: 209 ([M]<sup>+</sup>)

### 5-Methyl-2-(*p*-tolyl)benzoxazole<sup>9</sup>

Analytical TLC on silica gel, 1/19 acetone/petroleum ether.

White solid, mp = 134-136 °C.

**FT-IR** (KBr, 4000 – 400 cm<sup>-1</sup>): 3304, 2921, 2856, 1615, 1501, 1450, 1333, 1262.

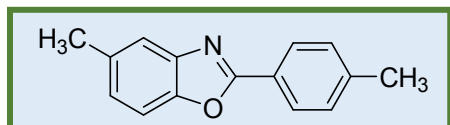

**<sup>1</sup>H NMR** (500 MHz, acetone-*d*<sub>6</sub>) δ 8.11 (d, *J* = 8.0 Hz, 2H), 7.53 – 7.51 (m, 2H), 7.39 (d, *J* = 8.0 Hz, 2H), 7.22 – 7.19 (m, 1H), 2.46 (s, 3H), 2.43 (s, 3H) ppm.

**<sup>13</sup>C NMR** (125 MHz, acetone-*d*<sub>6</sub>) δ 163.2, 149.2, 142.7, 142.3, 134.5, 129.9, 127.5, 126.3, 124.8, 119.9, 110.1, 20.9, 20.8 ppm.

**GC-MS** (EI, 70 eV) *m/z*: 223 ([M]<sup>+</sup>)

### 5-Methyl-2-(4-*tert*-butylphenyl)benzoxazole<sup>6</sup>

Analytical TLC on silica gel, 1/19 acetone/petroleum ether.

White solid, mp = 138-140 °C.

**FT-IR** (KBr, 4000 – 400 cm<sup>-1</sup>): 3107, 2963, 2930, 2871, 1729, 1621, 1532, 1460, 1269.

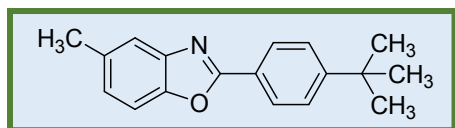

**<sup>1</sup>H NMR** (500 MHz, acetone-*d*<sub>6</sub>) δ 8.56 (d, *J* = 2.0 Hz, 1H), 8.34 (dd, *J* = 9.0, 2.0 Hz, 1H), 8.20 (d, *J* = 8.5 Hz, 2H), 7.92 (d, *J* = 9.0 Hz, 1H), 7.69 (d, *J* = 9.0 Hz, 2H), 2.81 (s, 3H), 1.39 (s, 9H) ppm.

**<sup>13</sup>C NMR** (125 MHz, acetone-*d*<sub>6</sub>) δ 162.9, 155.0, 149.0, 142.5, 134.3, 127.2, 126.1, 126.0, 124.6, 119.7, 109.9, 34.7, 30.5, 20.5 ppm.

**GC-MS** (EI, 70 eV) *m/z*: 265 ([M]<sup>+</sup>).

### 5-Methyl-2-(4-methoxyphenyl)benzoxazole<sup>9</sup>

Analytical TLC on silica gel, 1/19 acetone/petroleum ether.

White solid, mp = 112 °C.

**FT-IR** (KBr, 4000 – 400 cm<sup>-1</sup>): 2924, 2854, 1730, 1608, 1499, 1420, 1254.

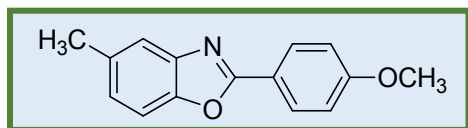

**<sup>1</sup>H NMR** (500 MHz, DMSO-*d*<sub>6</sub>) δ 8.12 (d, *J* = 9.0 Hz, 2H), 7.61 (d, *J* = 8.0 Hz, 1H), 7.55 (s, 1H), 7.20 (d, *J* = 8.5 Hz, 1H), 7.15 (d, *J* = 9.0 Hz, 2H), 3.87 (s, 3H), 2.44 (s, 3H) ppm.

**<sup>13</sup>C NMR** (125 MHz, DMSO-*d*<sub>6</sub>) δ 162.5, 148.7, 142.1, 134.7, 129.5, 126.5, 119.6, 119.5, 119.2, 115.2, 110.6, 55.9, 21.3 ppm.

**GC-MS** (EI, 70 eV) *m/z*: 239 ([M]<sup>+</sup>).

### 5-Methyl-2-(4-chlorophenyl)benzoxazole<sup>6</sup>

Analytical TLC on silica gel, 1/19 acetone/petroleum ether.

White solid, mp = 124-125 °C.

**FT-IR** (KBr, 4000 – 400 cm<sup>-1</sup>): 3050, 2957, 2849, 1615, 1501, 1450, 1420, 1287.

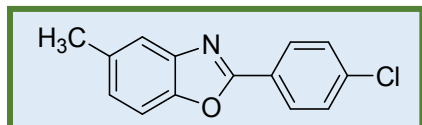

**<sup>1</sup>H NMR** (500 MHz, CDCl<sub>3</sub>): δ 8.18 (d, *J* = 9.0 Hz, 2H), 7.55 (s, 1H), 7.50 (d, *J* = 8.5 Hz, 2H), 7.45 (d, *J* = 8.0 Hz, 1H), 7.17 (d, *J* = 9.0 Hz, 1H), 2.49 (s, 3H) ppm.

**<sup>13</sup>C NMR** (125 MHz, acetone-*d*<sub>6</sub>): δ 162.3, 149.2, 142.4, 137.7, 134.7, 129.3, 128.9, 126.6, 126.0, 120.1, 110.1, 21.6 ppm.

**GC-MS** (EI, 70 eV) *m/z*: 243 ([M]<sup>+</sup>).

### 5-Methyl-2-(4-fluorophenyl)benzoxazole<sup>6</sup>

Analytical TLC on silica gel, 1/19 acetone/petroleum ether.

White solid, mp = 170-171 °C.

**FT-IR** (KBr, 4000 – 400 cm<sup>-1</sup>): 3050, 2957, 2849, 1615, 1501, 1450, 1420, 1287.

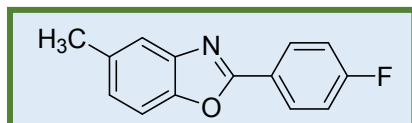

**<sup>1</sup>H NMR** (500 MHz, CDCl<sub>3</sub>) δ 8.27 – 8.17 (m, 2H), 7.53 (s, 1H), 7.42 (d, *J* = 8.5 Hz, 1H), 7.21 – 7.12 (m, 3H), 2.47 (s, 3H) ppm.

**<sup>13</sup>C NMR** (125 MHz, CDCl<sub>3</sub>): δ 164.9 (d, *J* = 250.9 Hz), 162.4, 149.2, 142.4, 134.6, 129.9 (d, *J* = 8.8 Hz), 126.4, 123.8 (d, *J* = 3 Hz), 120.0, 116.2 (d, *J* = 22.1 Hz), 110.0, 21.6 ppm

**GC-MS** (EI, 70 eV) *m/z*: 227 ([M]<sup>+</sup>)

### 5-Methyl-2-(4-hydroxyphenyl)benzoxazole<sup>10</sup>

Analytical TLC on silica gel, 1/19 acetone/petroleum ether.

White solid, Yield 81%, mp = 220-221 °C.

**FT-IR** (KBr, 4000 – 400 cm<sup>-1</sup>): 3050, 2957, 2849, 1615, 1501, 1450, 1420, 1287.

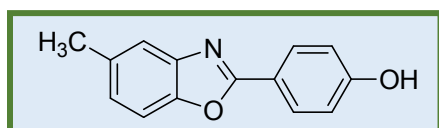

**<sup>1</sup>H NMR** (500 MHz, acetone-*d*<sub>6</sub>): δ 9.23 (s, 1H), 8.10 (d, *J* = 8.5 Hz, 2H), 7.50 (d, *J* = 8.5 Hz, 2H), 7.18 (d, *J* = 8.5 Hz, 1H), 7.03 (d, *J* = 8.5 Hz, 2H), 2.45 (s, 3H) ppm.

**<sup>13</sup>C NMR** (125 MHz, acetone-*d*<sub>6</sub>): δ 161.9, 154.5, 149.0, 143.6, 135.0, 132.8, 130.2, 126.5, 120.3, 116.8, 110.6, 21.4 ppm.

**GC-MS** (EI, 70 eV) *m/z*: 225 ([M]<sup>+</sup>).



### 5-Methyl-2-(pyridin-4-yl)benzoxazole<sup>11</sup>

Analytical TLC on silica gel, 1/19 acetone/petroleum ether.

White solid, mp = 129 - 130 °C.

**FT-IR** (KBr, 4000 – 400 cm<sup>-1</sup>): 3406, 2921, 1612, 1537, 1414, 1344, 1068, 808.

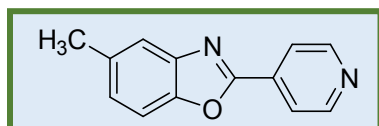

**<sup>1</sup>H NMR** (500 MHz, CDCl<sub>3</sub>): δ 8.80 (d, *J* = 4.5 Hz, 2H), 8.07 (d, *J* = 5.0 Hz, 2H), 7.59 (s, 1H), 7.48 (d, *J* = 8.5 Hz, 1H), 7.23 (d, *J* = 8.0 Hz, 1H), 2.50 (s, 3H) ppm.

**<sup>13</sup>C NMR** (125 MHz, CDCl<sub>3</sub>): δ 160.8, 150.7, 149.3, 142.1, 135.2, 134.8, 127.7, 121.1, 120.6, 110.4, 21.6 ppm.

**GC-MS** (EI, 70 eV) *m/z*: 210 ([M]<sup>+</sup>).

### 5-Chloro-2-phenylbenzoxazole<sup>7</sup>

Analytical TLC on silica gel, 1/19 acetone/petroleum ether.

White solid, mp = 102-104 °C.

**FT-IR** (KBr, 4000 – 400 cm<sup>-1</sup>): 3061, 1612, 1551, 1443, 1333, 1265.

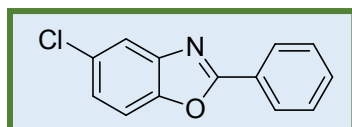

**<sup>1</sup>H NMR** (500 MHz, acetone-*d*<sub>6</sub>) δ 8.23 (d, *J* = 7.5 Hz, 2H), 7.77 (d, *J* = 1.5 Hz, 1H), 7.70 (d, *J* = 7.5 Hz, 1H), 7.59 – 7.64 (m, 3H), 7.42 (dd, *J* = 9.0, 1.5 Hz, 1H) ppm.

**<sup>13</sup>C NMR** (125 MHz, acetone-*d*<sub>6</sub>) δ 165.3, 150.6, 144.5, 133.1, 130.7, 130.2, 128.6, 127.7, 126.4, 120.7, 112.9 ppm.

**GC-MS** (EI, 70 eV) *m/z*: 229 ([M]<sup>+</sup>).

### 5-Chloro-2-(*p*-tolyl)benzoxazole<sup>12</sup>

Analytical TLC on silica gel, 1/19 acetone/petroleum ether.

White solid, mp = 138-140 °C.

**FT-IR** (KBr, 4000 – 400 cm<sup>-1</sup>): 2925, 1610, 1551, 1479, 1258.

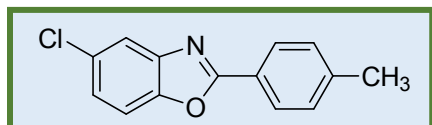

**<sup>1</sup>H NMR** (500 MHz, acetone-*d*<sub>6</sub>) δ 8.13 (d, *J* = 8.0 Hz, 2H), 7.75 (d, *J* = 2.0 Hz, 1H), 7.70 (d, *J* = 9.0 Hz, 1H), 7.40 – 7.33 (m, 4H), 2.44 (s, 3H) ppm.

**<sup>13</sup>C NMR** (125 MHz, acetone-*d*<sub>6</sub>) δ 165.6, 150.5, 144.6, 143.8, 130.8, 130.6, 128.6, 126.2, 125.0, 120.5, 112.8, 21.7 ppm.

**GC-MS** (EI, 70 eV) *m/z*: 243 ([M]<sup>+</sup>).

### 5-Chloro-2-(4-*tert*-butylphenyl)benzoxazole<sup>13</sup>

Analytical TLC on silica gel, 1/19 acetone/petroleum ether.

White solid, mp = 140-142 °C.

**FT-IR** (KBr, 4000 – 400 cm<sup>-1</sup>): 2957, 2902, 2866, 1611, 1552, 1493, 1457, 1262.

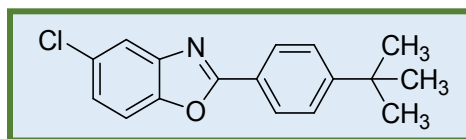

**<sup>1</sup>H NMR** (500 MHz, acetone-*d*<sub>6</sub>) δ 8.17 (d, *J* = 8.5 Hz, 2H), 7.76 (s, 1H), 7.70 (d, *J* = 8.5 Hz, 1H), 7.66 (d, *J* = 8.5 Hz, 2H), 7.41 (dd, *J* = 8.5, 2.0 Hz, 1H), 1.38 (s, 9H) ppm.

**<sup>13</sup>C NMR** (125 MHz, acetone-*d*<sub>6</sub>) δ 165.5, 156.7, 150.6, 144.6, 130.6, 128.6, 127.2, 126.2, 125.0, 120.5, 112.8, 35.9, 31.5 ppm.

**GC-MS** (EI, 70 eV) *m/z*: 285 ([M]<sup>+</sup>).

### 5-Chloro-2-(4-methoxyphenyl)benzoxazole<sup>12</sup>

Analytical TLC on silica gel, 1/19 acetone/petroleum ether.

White solid, mp = 148-150 °C.

**FT-IR** (KBr, 4000 – 400 cm<sup>-1</sup>): 2962, 1610, 1551, 1479, 1448, 1258.

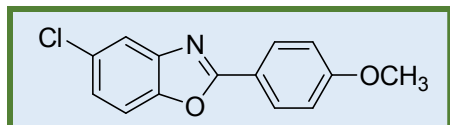

**<sup>1</sup>H NMR** (500 MHz, acetone-*d*<sub>6</sub>) δ 8.19 – 8.17 (m, 2H), 7.72 (d, *J* = 2.0 Hz, 1H), 7.67 (d, *J* = 8.5 Hz, 1H), 7.38 (dd, *J* = 8.5, 2.0 Hz, 1H), 7.16 – 7.14 (m, 2H), 3.92 (s, 3H) ppm.

**<sup>13</sup>C NMR** (125 MHz, acetone-*d*<sub>6</sub>) δ 165.5, 164.1, 150.5, 144.8, 130.5, 126.6, 125.8, 120.3, 120.0, 115.7, 112.6, 56.2 ppm.

**GC-MS** (EI, 70 eV) *m/z*: 259 ([M]<sup>+</sup>).

### 5-Chloro-2-(4-fluorophenyl)benzoxazole<sup>14</sup>

Analytical TLC on silica gel, 1/19 acetone/petroleum ether.

White solid, mp = 156-157 °C.

**FT-IR** (KBr, 4000 – 400 cm<sup>-1</sup>): 3061, 2922, 1610, 1551, 1481, 1450, 1331, 1260, 1227.

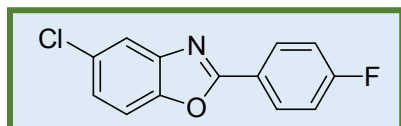

**<sup>1</sup>H NMR** (500 MHz, acetone-*d*<sub>6</sub>) δ 8.31 (dd, *J* = 8.5, 5.5 Hz, 2H), 7.78 (s, 1H), 7.73 (d, *J* = 8.6 Hz, 1H), 7.47 – 7.38 (m, 3H) ppm.

**<sup>13</sup>C NMR** (125 MHz, acetone-*d*<sub>6</sub>): δ 166.0 (d, *J* = 250 Hz), 164.3, 150.5, 144.3, 131.1 (d, *J* = 9.0 Hz), 130.6, 126.3, 124.2, 120.5, 117.2 (d, *J* = 22.4 Hz), 112.7 ppm.

**GC-MS** (EI, 70 eV) *m/z*: 247 ([M]<sup>+</sup>)

### 5-Chloro-2-(4-chlorophenyl)benzoxazole<sup>12</sup>

Analytical TLC on silica gel, 1/19 acetone/petroleum ether.

White solid, mp = 190-192 °C.

**FT-IR** (KBr, 4000 – 400 cm<sup>-1</sup>): 2925, 1610, 1549, 1542, 1480, 1449, 1260, 1197.

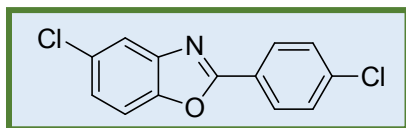

**<sup>1</sup>H NMR** (500 MHz, acetone-*d*<sub>6</sub>) δ 8.28 – 8.23 (m, 2H), 7.80 (d, *J* = 1.5 Hz, 1H), 7.74 (d, *J* = 8.5 Hz, 1H), 7.69 – 7.65 (m, 2H), 7.46 (dd, *J* = 8.5, 1.5 Hz, 1H) ppm.

**<sup>13</sup>C NMR** (125 MHz, acetone-*d*<sub>6</sub>): δ 164.6, 150.7, 144.4, 138.8, 130.9, 130.5, 130.3, 126.8, 126.6, 120.8, 113.0 ppm.

**GC-MS** (EI, 70 eV) *m/z*: 263.

### 5-Chloro-2-(4-hydroxyphenyl)benzoxazole<sup>10</sup>

Analytical TLC on silica gel, 1/19 acetone/petroleum ether.

White solid, mp = 185-187 °C.

**FT-IR** (KBr, 4000 – 400 cm<sup>-1</sup>): 3162, 2920, 2850, 1666, 1596, 1553, 1446, 1448, 1333, 1286, 1217.

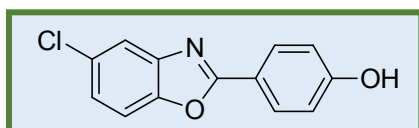

**<sup>1</sup>H NMR** (500 MHz, acetone-*d*<sub>6</sub>): δ 8.13 – 8.09 (m, 2H), 7.69 (dd, *J* = 8.5, 2.0 Hz, 2H), 7.38 (dd, *J* = 8.5, 2.0 Hz, 1H), 7.07 – 7.04 (m, 2H) ppm.

**<sup>13</sup>C NMR** (125 MHz, acetone-*d*<sub>6</sub>): δ 162.1, 150.2, 144.7, 130.6, 125.5, 121.6, 120.0, 118.9, 117.0, 112.4, 88.3 ppm.

**GC-MS** (EI, 70 eV) *m/z*: 245 ([M]<sup>+</sup>).

### 5-Chloro-2-(pyridin-4-yl)benzoxazole<sup>11</sup>

Analytical TLC on silica gel, 1/19 acetone/petroleum ether.

White solid, mp = 152 - 153 °C.

**FT-IR** (KBr, 4000 – 400 cm<sup>-1</sup>): 3431, 2922, 1612, 1568, 1539, 1449, 1057, 874.

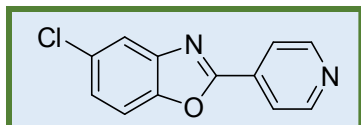

**<sup>1</sup>H NMR** (500 MHz, (CDCl<sub>3</sub>): δ 8.83 (d, *J* = 5.5 Hz, 2H), 8.07 (dd, *J* = 4.5, 1.5 Hz, 2H), 7.80 (d, *J* = 2.0 Hz, 1H), 7.55 (d, *J* = 8.5 Hz, 1H), 7.40 (dd, *J* = 8.5, 2.0 Hz, 1H) ppm.

**<sup>13</sup>C NMR** (125 MHz, (CDCl<sub>3</sub>): δ 162.0, 150.8, 149.6, 143.0, 134.2, 130.9, 126.9, 121.3, 120.8, 111.9 ppm.

**GC-MS** (EI, 70 eV) *m/z*: 230 ([M]<sup>+</sup>).

### 5-Nitro-2-phenylbenzoxazole<sup>12</sup>

Analytical TLC on silica gel, 1/19 acetone/petroleum ether.

Yellow solid, mp = 167-168 °C.

**FT-IR** (KBr, 4000 – 400 cm<sup>-1</sup>): 3107, 2922, 2852, 1704, 1604, 1525, 1473, 1448, 1247, 1285.

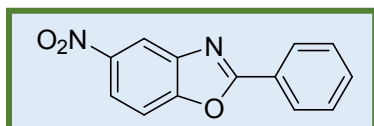

**<sup>1</sup>H NMR** (500 MHz, DMSO-*d*<sub>6</sub>) δ 8.68 (d, *J* = 2.5 Hz, 1H), 8.35 (dd, *J* = 9.0, 2.0 Hz, 1H), 8.26 – 8.24 (m, 2H), 8.06 (d, *J* = 9.0 Hz, 1H), 7.71 – 7.65 (m, 3H) ppm.

**<sup>13</sup>C NMR** (125 MHz, DMSO-*d*<sub>6</sub>) δ 165.4, 154.0, 145.1, 141.9, 132.9, 129.5, 127.8, 125.5, 121.5, 115.7, 111.8 ppm.

**GC-MS** (EI, 70 eV) *m/z*: 240 ([M]<sup>+</sup>)

### 5-Nitro-2-(*p*-tolyl)benzoxazole<sup>15</sup>

Analytical TLC on silica gel, 1/19 acetone/petroleum ether.

Yellow solid, mp = 125-126 °C.

**FT-IR** (KBr, 4000 – 400 cm<sup>-1</sup>): 3467, 3106, 2964, 2869, 1723, 1531, 1462, 1420, 1130.

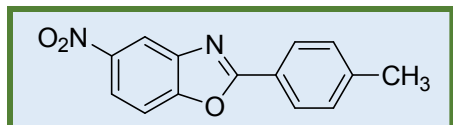

**<sup>1</sup>H NMR** (500 MHz, acetone-*d*<sub>6</sub>) δ 8.31 – 8.27 (m, 2H), 7.57 – 7.55 (m, 2H), 7.40 – 7.35 (m, 2H), 7.24 (d, *J* = 9.0 Hz, 1H), 2.47 (s, 3H) ppm.

**<sup>13</sup>C NMR** (125 MHz, acetone-*d*<sub>6</sub>) δ 166.7, 164.7, 150.0, 143.3, 135.5, 130.8, 130.7, 127.30, 124.8, 120.7, 117.2, 117.0, 110.9, 21.4 ppm.

**GC-MS** (EI, 70 eV) *m/z*: 254 ([M]<sup>+</sup>)

### 5-Nitro-2-(4-*tert*-butylphenyl)benzoxazole<sup>16</sup>

Analytical TLC on silica gel, 1/19 acetone/petroleum ether.

White solid, mp = 154-156 °C.

**FT-IR** (KBr, 4000 – 400 cm<sup>-1</sup>): 3106, 2964, 2869, 1723, 1531, 1462, 1410, 1267.

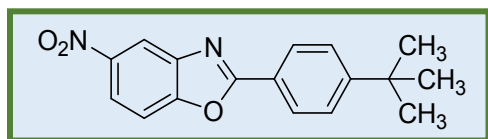

**<sup>1</sup>H NMR** (500 MHz, acetone-*d*<sub>6</sub>) δ 8.18 – 8.16 (m, 2H), 7.66 – 7.63 (m, 2H), 7.56 – 7.54 (m, 2H), 7.23 – 7.21 (m, 1H), 1.38 (s, 9H) ppm.

**<sup>13</sup>C NMR** (125 MHz, acetone-*d*<sub>6</sub>) δ 166.9, 157.3, 155.3, 146.4, 143.6, 132.1, 129.7, 128.7, 127.2, 124.2, 122.0, 116.4, 112.1, 35.8, 31.4 ppm.

**GC-MS** (EI, 70 eV) *m/z*: 296 ([M]<sup>+</sup>)

### 5-Nitro-2-(4-methoxyphenyl)benzoxazole<sup>12</sup>

Analytical TLC on silica gel, 1/19 acetone/petroleum ether.

Yellow solid, mp = 182-183 °C.

**FT-IR** (KBr, 4000 – 400 cm<sup>-1</sup>): 3457, 2964, 1723, 1631, 1462, 1410, 1267.

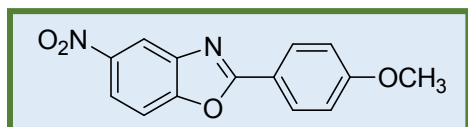

**<sup>1</sup>H NMR** (500 MHz, acetone-*d*<sub>6</sub>) δ 8.55 (d, *J* = 2.5 Hz, 1H), 8.34 (dd, *J* = 9.0, 2.5 Hz, 1H), 8.25 – 8.23 (m, 2H), 7.91 (d, *J* = 9.0 Hz, 1H), 7.20 – 7.18 (m, 2H), 3.95 (s, 3H) ppm.

**<sup>13</sup>C NMR** (125 MHz, acetone-*d*<sub>6</sub>) δ 163.5, 154.4, 142.8, 129.8, 120.8, 118.3, 115.2, 114.8, 111.0, 55.2 ppm.

**GC-MS** (EI, 70 eV) *m/z*: 270 ([M]<sup>+</sup>)

### 5-Nitro-2-(4-fluorophenyl)benzoxazole<sup>15</sup>

Analytical TLC on silica gel, 1/19 acetone/petroleum ether.

White solid, Yield 74%, mp = 202-205 °C.

**FT-IR** (KBr, 4000 – 400 cm<sup>-1</sup>): 3061, 2925, 1650, 1584, 1582, 1542, 1473, 1448, 1247, 1225.

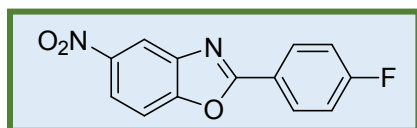

**<sup>1</sup>H NMR** (500 MHz, acetone-*d*<sub>6</sub>): δ 8.60 (d, *J* = 2.3 Hz, 1H), 8.39 – 8.35 (m, 3H), 7.96 (d, *J* = 8.9 Hz, 1H), 7.47 – 7.41 (m, 2H) ppm.

**<sup>13</sup>C NMR** (125 MHz, acetone-*d*<sub>6</sub>): δ 166.2 (d, *J* = 250.0 Hz), 155.3, 131.3 (d, *J* = 10.0 Hz), 123.5, 122.0, 117.3 (d, *J* = 22.5 Hz), 116.5, 112.1 ppm.

**GC-MS** (EI, 70 eV) *m/z*: 258 ([M]<sup>+</sup>).

### 5-Nitro-2-(4-chlorophenyl)benzoxazole<sup>15</sup>

Analytical TLC on silica gel, 1/19 acetone/petroleum ether.

White solid, mp = 207-210 °C.

**FT-IR** (KBr, 4000 – 400 cm<sup>-1</sup>): 3420, 3105, 2964, 2853, 1723, 1528, 1434, 1410, 1256.

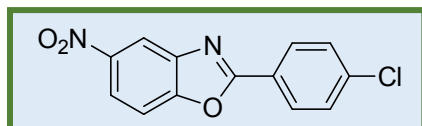

**<sup>1</sup>H NMR** (500 MHz, acetone-*d*<sub>6</sub>): δ 8.62 (d, *J* = 2.0 Hz, 1H), 8.39 (dd, *J* = 8.5, 2.0 Hz, 1H), 8.31 – 8.29 (m, 2H), 7.97 (d, *J* = 9 Hz, 1H), 7.72 – 7.68 (m, 2H) ppm.

**<sup>13</sup>C NMR** (125 MHz, acetone-*d*<sub>6</sub>): δ 155.4, 139.3, 130.4, 130.3, 129.5, 125.3, 122.2, 116.6, 114.8, 112.2, 103.5 ppm.

**GC-MS** (EI, 70 eV) *m/z*: 274 ([M]<sup>+</sup>).



## Characterization of 2-arylbenzothiazoles

### 2-Phenylbenzothiazole<sup>17</sup>

Analytical TLC on silica gel, 1/19 ethyl acetate/hexanes.

White solid, mp = 125-126 °C.

**FT-IR** (KBr, 4000 – 400 cm<sup>-1</sup>): 3435, 3063, 1508, 1283, 1027, 763.

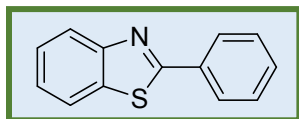

**<sup>1</sup>H NMR** (500 MHz, CDCl<sub>3</sub>) δ 8.12 – 8.08 (m, 3H), 7.91 (d, *J* = 8.0 Hz, 1H), 7.52 – 7.48 (m, 4H), 7.41 – 7.36 (m, 1H) ppm.

**<sup>13</sup>C NMR** (125 MHz, CDCl<sub>3</sub>): δ 168.2, 154.3, 135.2, 133.8, 131.1, 129.2, 127.7, 126.5, 125.3, 123.4, 121.6 ppm.

**GC-MS** (EI, 70 eV) *m/z*: 211 ([M]<sup>+</sup>)

### 2-(4-Methylphenyl)benzothiazole<sup>17</sup>

Analytical TLC on silica gel, 1/19 ethyl acetate/hexanes.

White solid, mp = 95 – 96 °C.

**FT-IR** (KBr, 4000 – 400 cm<sup>-1</sup>): 3427, 2919, 1605, 1477, 1216.

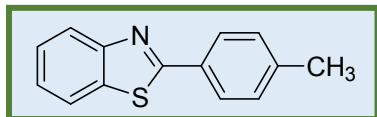

**<sup>1</sup>H NMR** (500 MHz, CDCl<sub>3</sub>): δ 8.10 – 8.04 (m, 1H), 7.99 (d, *J* = 8.0 Hz, 2H), 7.88 (dd, *J* = 8.0, 0.5 Hz, 1H), 7.50 – 7.46 (m, 1H), 7.39 – 7.35 (m, 1H), 7.29 (d, *J* = 8.0 Hz, 2H), 2.42 (s, 3H) ppm.

**<sup>13</sup>C NMR** (125 MHz, CDCl<sub>3</sub>): δ 168.3, 154.3, 141.5, 135.1, 131.1, 129.8, 127.6, 126.4, 125.1, 123.2, 121.7, 21.6 ppm.

**GC-MS** (EI, 70 eV) *m/z*: 225 ([M]<sup>+</sup>)

## 2-(4-Methoxyphenyl)benzothiazole<sup>17</sup>

Analytical TLC on silica gel, 1/19 ethyl acetate/hexanes.

White solid, mp = 123-124 °C.

**FT-IR** (KBr, 4000 – 400 cm<sup>-1</sup>): 3408, 2926, 1599, 1478, 1255, 1023, 830.

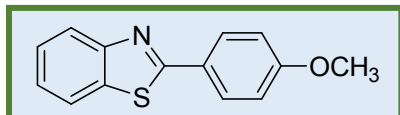

**<sup>1</sup>H NMR** (500 MHz, CDCl<sub>3</sub>): δ 8.06 – 8.01 (m, 3H), 7.88 (d, *J* = 8.0 Hz, 1H), 7.49 – 7.45 (m, 1H), 7.38 – 7.33 (m, 1H), 7.02 – 6.98 (m, 2H), 3.89 (s, 3H) ppm.

**<sup>13</sup>C NMR** (125 MHz, CDCl<sub>3</sub>): δ 168.0, 162.1, 154.3, 135.0, 129.3, 126.6, 126.4, 125.0, 123.0, 121.7, 114.5, 55.6 ppm.

**GC-MS** (EI, 70 eV) *m/z*: 241 ([M]<sup>+</sup>)

## 2-(4-Fluorophenyl)benzothiazole<sup>17</sup>

Analytical TLC on silica gel, 1/19 ethyl acetate/hexanes.

White solid, mp = 110 °C.

**FT-IR** (KBr, 4000 – 400 cm<sup>-1</sup>): 3430, 2922, 1639, 1480, 1226, 964.

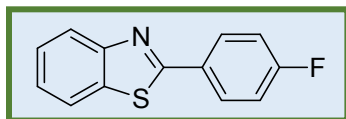

**<sup>1</sup>H NMR** (500 MHz, CDCl<sub>3</sub>): δ 8.10 – 8.05 (m, 3H), 7.89 (d, *J* = 8.0 Hz, 1H), 7.52 – 7.48 (m, 1H), 7.41 – 7.37 (m, 1H), 7.20 – 7.16 (m, 2H) ppm.

**<sup>13</sup>C NMR** (125 MHz, CDCl<sub>3</sub>): δ 166.9, 164.0 (d, *J* = 250 Hz), 154.3, 135.2, 130.1 (d, *J* = 2.5 Hz), 129.5 (d, *J* = 8.8 Hz), 126.5, 125.4, 123.4, 121.7, 116.1 (d, *J* = 22.5 Hz) ppm.

**GC-MS** (EI, 70 eV) *m/z*: 229 ([M]<sup>+</sup>).

## 2-(4-Chlorophenyl)benzothiazole<sup>17</sup>

Analytical TLC on silica gel, 1/19 ethyl acetate/hexanes.

White solid, mp = 119-120 °C.

**FT-IR** (KBr, 4000 – 400 cm<sup>-1</sup>): 3432, 3053, 1635, 1505, 1311, 1086, 826.

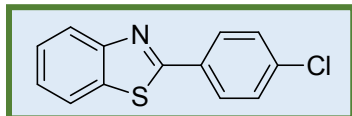

**<sup>1</sup>H NMR** (500 MHz, CDCl<sub>3</sub>) δ 8.09 – 8.05 (m, 1H), 8.04 – 8.01 (m, 2H), 7.90 (d, *J* = 8.0 Hz, 1H), 7.52 – 7.44 (m, 3H), 7.40 (m, 1H) ppm.

**<sup>13</sup>C NMR** (125 MHz, CDCl<sub>3</sub>): δ 166.8, 154.3, 137.2, 135.2, 132.3, 129.4, 128.9, 126.6, 125.6, 123.5, 121.8 ppm.

**GC-MS** (EI, 70 eV) *m/z*: 245 ([M]<sup>+</sup>)

## 2-(4-Nitrophenyl)benzothiazole<sup>17</sup>

Analytical TLC on silica gel, 1/19 ethyl acetate/hexanes.

Yellow solid, Yield 75%, mp = 207 °C.

**FT-IR** (KBr, 4000 – 400 cm<sup>-1</sup>): 3429, 2922, 1518, 1339, 1101, 965.

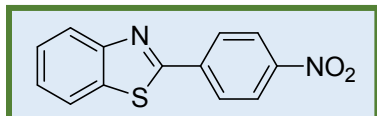

**<sup>1</sup>H NMR** (500 MHz, CDCl<sub>3</sub>): δ 8.37 – 8.34 (m, 2H), 8.29 – 8.26 (m, 2H), 8.13 (d, *J* = 8.0 Hz, 1H), 7.96 (d, *J* = 8.0 Hz, 1H), 7.58 – 7.53 (m, 1H), 7.48 – 7.45 (m, 1H) ppm.

**<sup>13</sup>C NMR** (125 MHz, CDCl<sub>3</sub>): δ 165.0, 154.3, 149.2, 139.3, 135.7, 128.4, 127.1, 126.4, 124.5, 124.1, 122.0 ppm.

**GC-MS** (EI, 70 eV) *m/z*: 256 ([M]<sup>+</sup>)

## Characterization of 2-arylbenzimidazoles

### 2-Phenylbenzimidazole<sup>5,3,18</sup>

Analytical TLC on silica gel, 1/19 ethyl acetate/petroleum ether, mp = 293-294 °C.

**FT-IR** (KBr, 4000 – 400 cm<sup>-1</sup>): 3411, 1540, 1450, 1408, 967, 774.

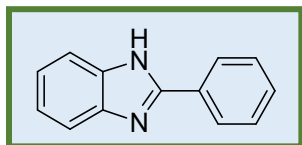

**<sup>1</sup>H NMR** (500 MHz, DMSO-d<sub>6</sub>): δ 8.18 (d, *J* = 7.5 Hz, H), 7.60 (s, 1H), 7.57 – 7.55 (m, 2H), 7.51 – 7.48 (m, 1H), 7.22 – 7.19 (m, 2H) ppm.

**<sup>13</sup>C NMR** (125 MHz, DMSO-d<sub>6</sub>): δ 151.2, 130.2, 129.8, 128.9, 126.4, 122.1 ppm.

**GC-MS** (EI, 70 eV) *m/z* 195 ([M]<sup>+</sup>).

### 2-(4-Methoxyphenyl)benzimidazole<sup>5</sup>

Analytical TLC on silica gel, 1/19 ethyl acetate/petroleum ether, mp = 204 °C.

**FT-IR** (KBr, 4000 – 400 cm<sup>-1</sup>): 3395, 3055, 1452, 1406, 1274, 741.

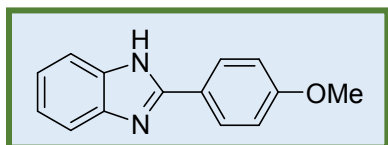

**<sup>1</sup>H NMR** (500 MHz, DMSO-d<sub>6</sub>): δ 8.49 (s, 1H), 8.05 (d, *J* = 7.5 Hz, 1H), 7.88 (d, *J* = 9Hz, 2H), 7.81 (d, *J* = 8.0 Hz, 1H), 7.47 – 7.41 (m, 2H), 7.17 (d, *J* = 8.5 Hz, 2H), 3.90 (s, 3H) ppm.

**<sup>13</sup>C NMR** (125 MHz, DMSO-d<sub>6</sub>): δ 166.4, 163.2, 144.3, 143.7, 132.4, 132.1, 131.6, 125.1, 124.7, 124.5, 120.1, 115.0, 114.4, 55.7 ppm.

**GC-MS** (EI, 70 eV) *m/z* 225 ([M]<sup>+</sup>).

## 2-(4-Fluorophenyl)benzimidazole<sup>5</sup>

Analytical TLC on silica gel, 1/9 ethyl acetate/petroleum ether, mp = 253-254 °C

**FT-IR** (KBr, 4000 – 400 cm<sup>-1</sup>): 3429, 3060, 1604, 1440, 964, 743.

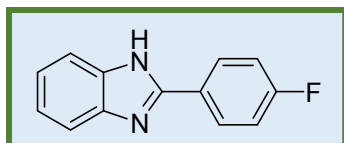

**<sup>1</sup>H NMR** (500 MHz, DMSO-d<sub>6</sub>): δ 8.23 – 8.21 (m, 2H), 7.59 – 7.58 (m, 2H), 7.42 – 7.38 (m, 2H), 7.22 – 7.18 (m, 2H) ppm.

**<sup>13</sup>C NMR** (125 MHz, DMSO-d<sub>6</sub>): δ 163.0 (d, *J* = 245.0 Hz), 150.4, 131.3, 128.7 (d, *J* = 8.75 Hz), 126.8, 122.1, 116.0, 115.9 ppm.

**GC-MS** (EI, 70 eV) *m/z* 213 ([M]<sup>+</sup>).

## 2-(4-Nitrophenyl)benzimidazole<sup>5</sup>

Analytical TLC on silica gel, 1/9 ethyl acetate/petroleum ether, mp = 234-236 °C

**FT-IR** (KBr, 4000 – 400 cm<sup>-1</sup>): 3321, 3047, 1517, 1340, 853, 741.

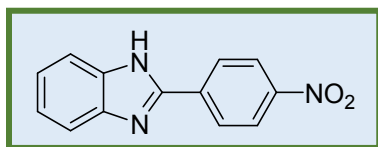

**<sup>1</sup>H NMR** (500 MHz, DMSO-d<sub>6</sub>): δ 7.89 – 7.87 (m, 2H), 7.82 – 7.80 (m, 1H), 7.77 – 7.74 (m, 1H), 7.66 – 7.63 (m, 2H), 7.49 – 7.43 (m, 2H) ppm.

**<sup>13</sup>C NMR** (125 MHz, DMSO-d<sub>6</sub>): δ 167.5, 144.3, 143.8, 141.9, 133.1, 132.7, 131.9, 129.7, 129.0, 125.4, 125.0, 120.1, 115.2 ppm.

**GC-MS** (EI, 70 eV) *m/z* 240 ([M]<sup>+</sup>).

## Section S5. $^1\text{H}$ and $^{13}\text{C}$ NMR spectroscopy

### Triphenyl(butyl-4-sulphonyl)phosphonium toluenesulfonate

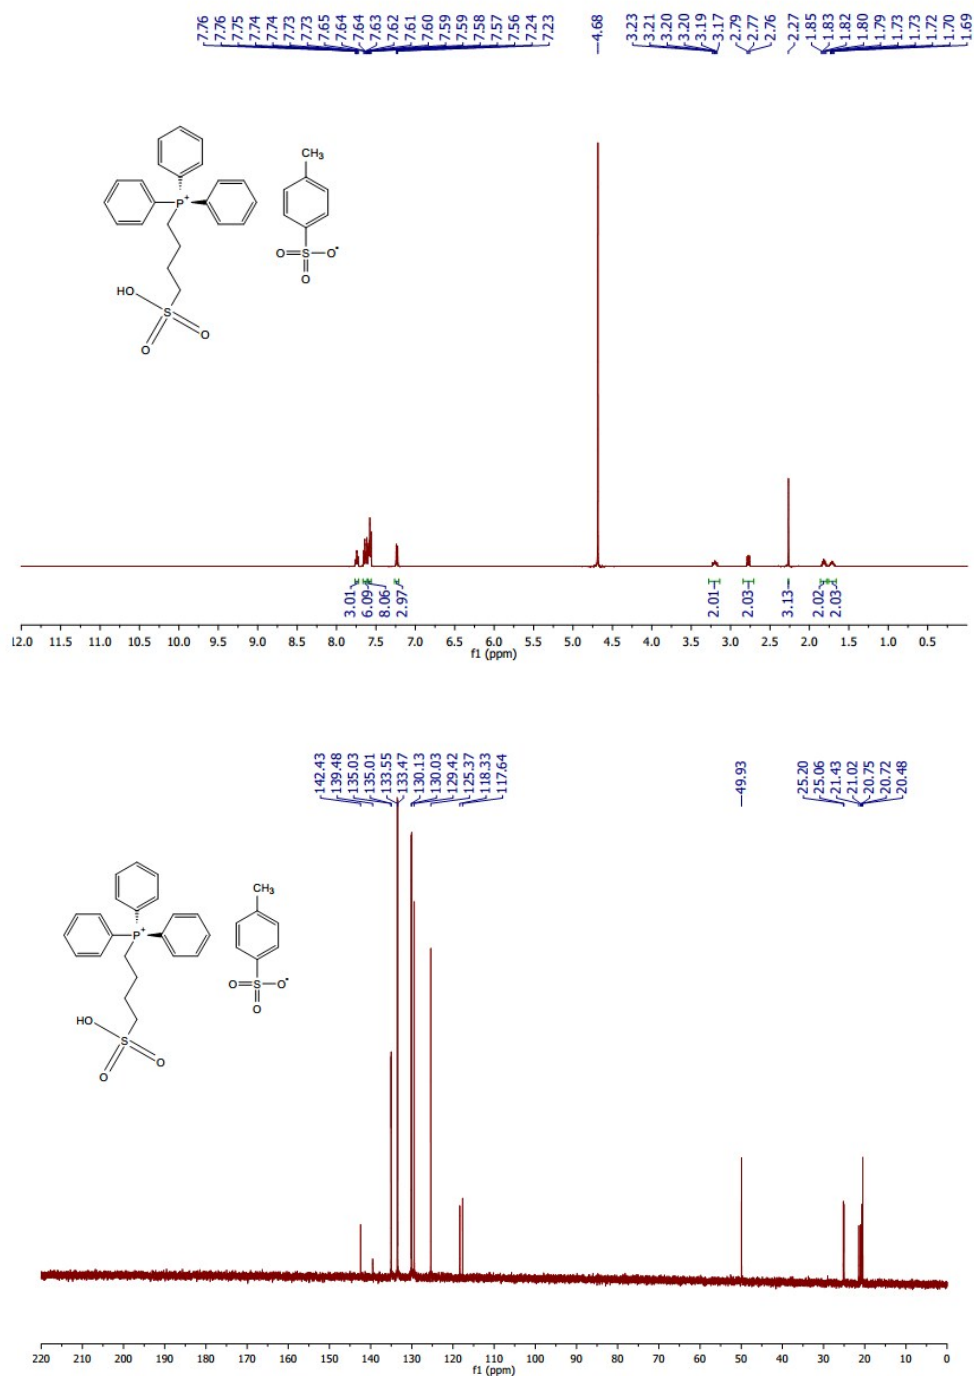

Figure S2.  $^1\text{H}$  and  $^{13}\text{C}$  NMR spectra of triphenyl(butyl-4-sulphonyl)phosphonium toluenesulfonate

## Characterization of 2-arylbenzoxazoles

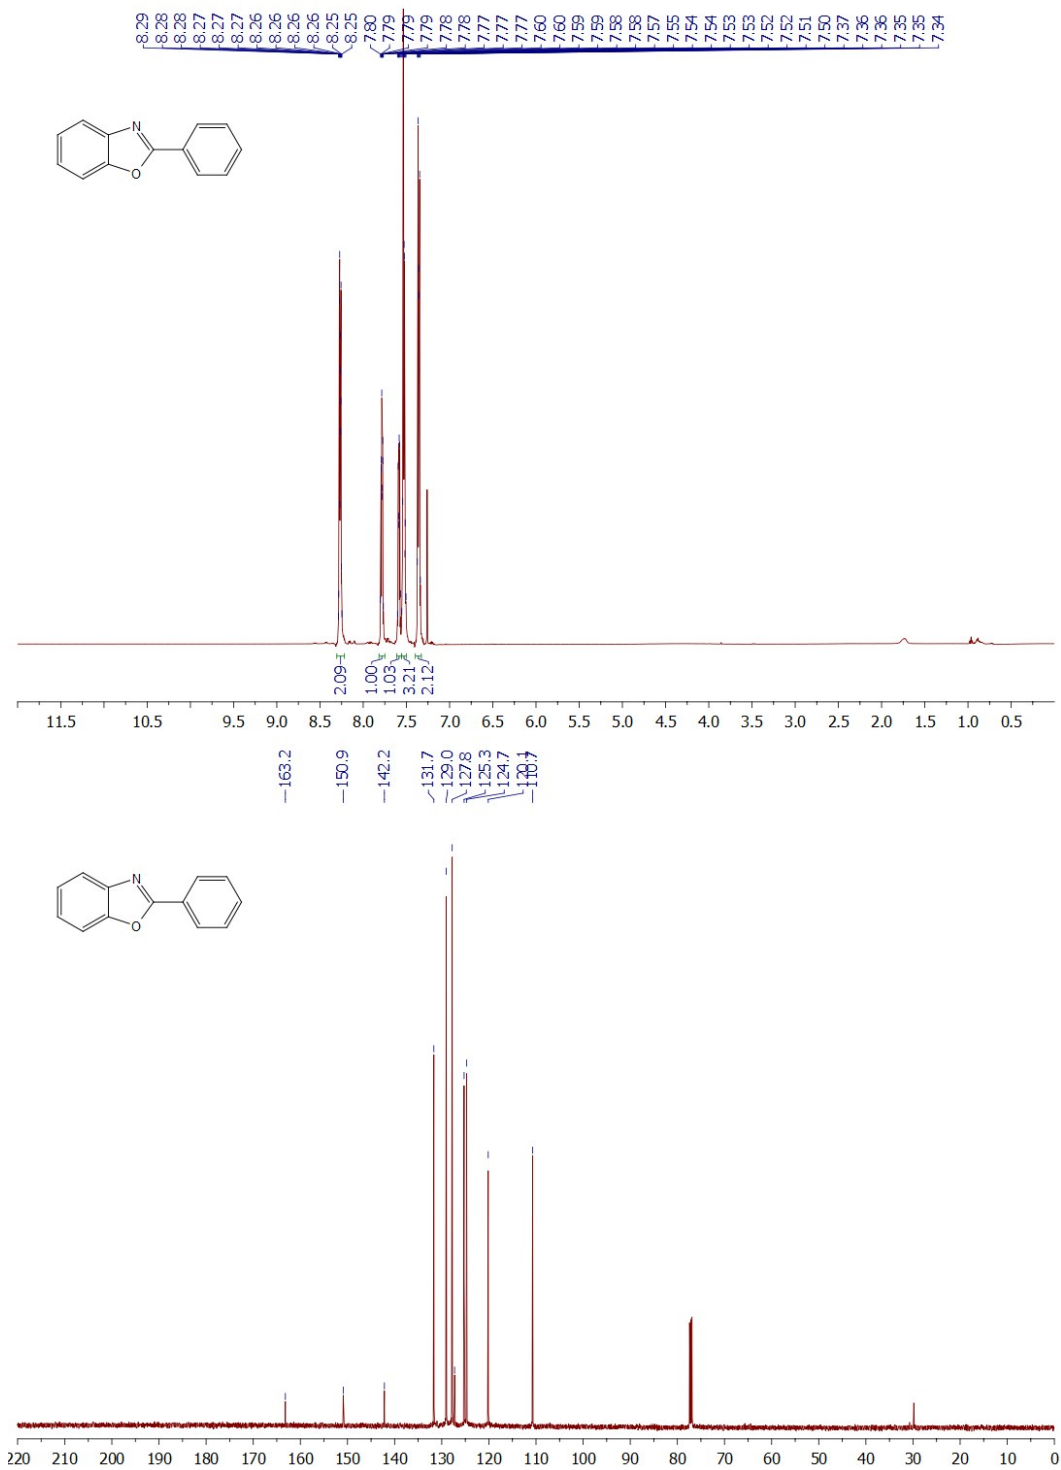

**Figure S3.**  $^1\text{H}$  and  $^{13}\text{C}$  NMR spectra of 2-phenylbenzoxazole

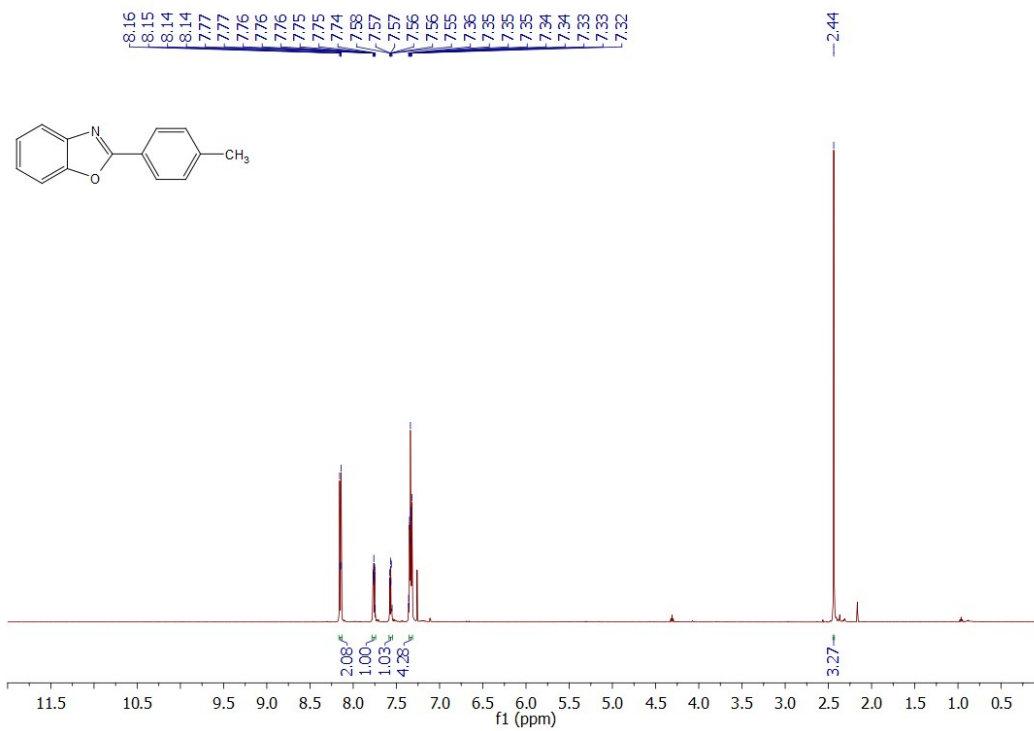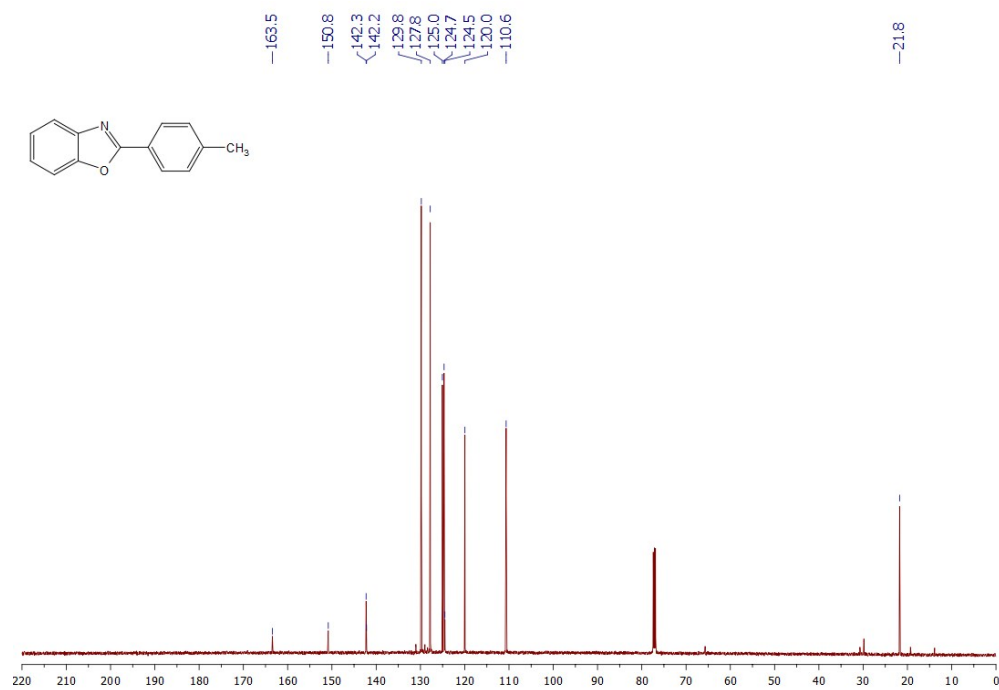

**Figure S4.** <sup>1</sup>H and <sup>13</sup>C NMR spectra of 2-(4-methylphenyl)benzoxazole



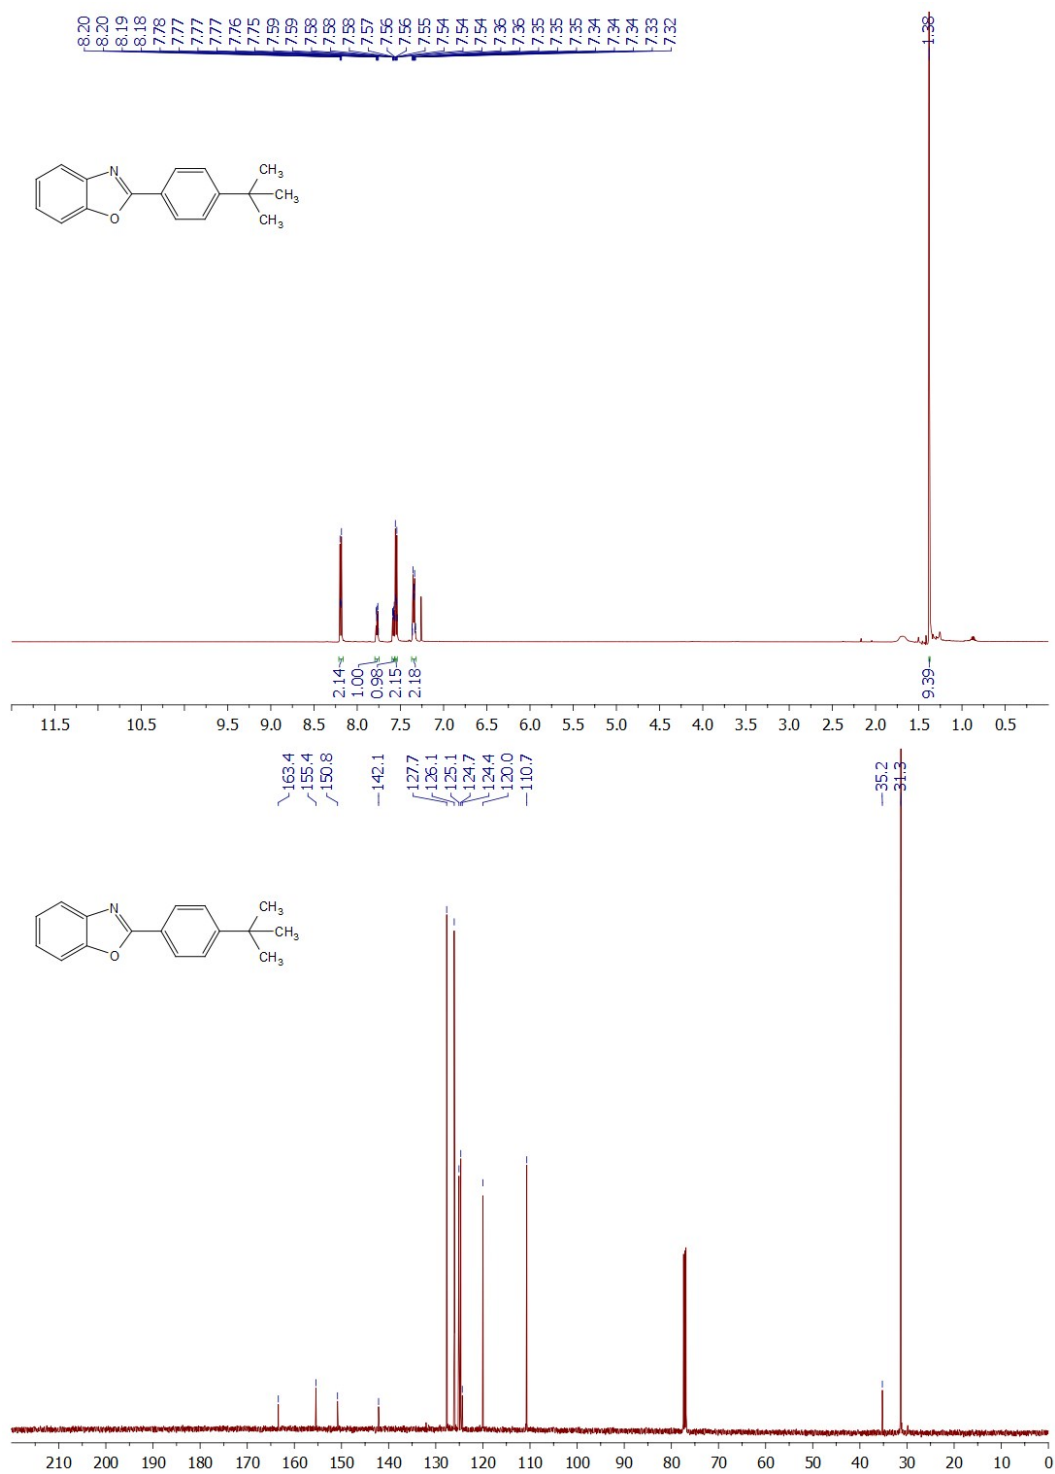

**Figure S5.** <sup>1</sup>H and <sup>13</sup>C NMR spectra of 2-(4-*tert*-butylphenyl)benzoxazole

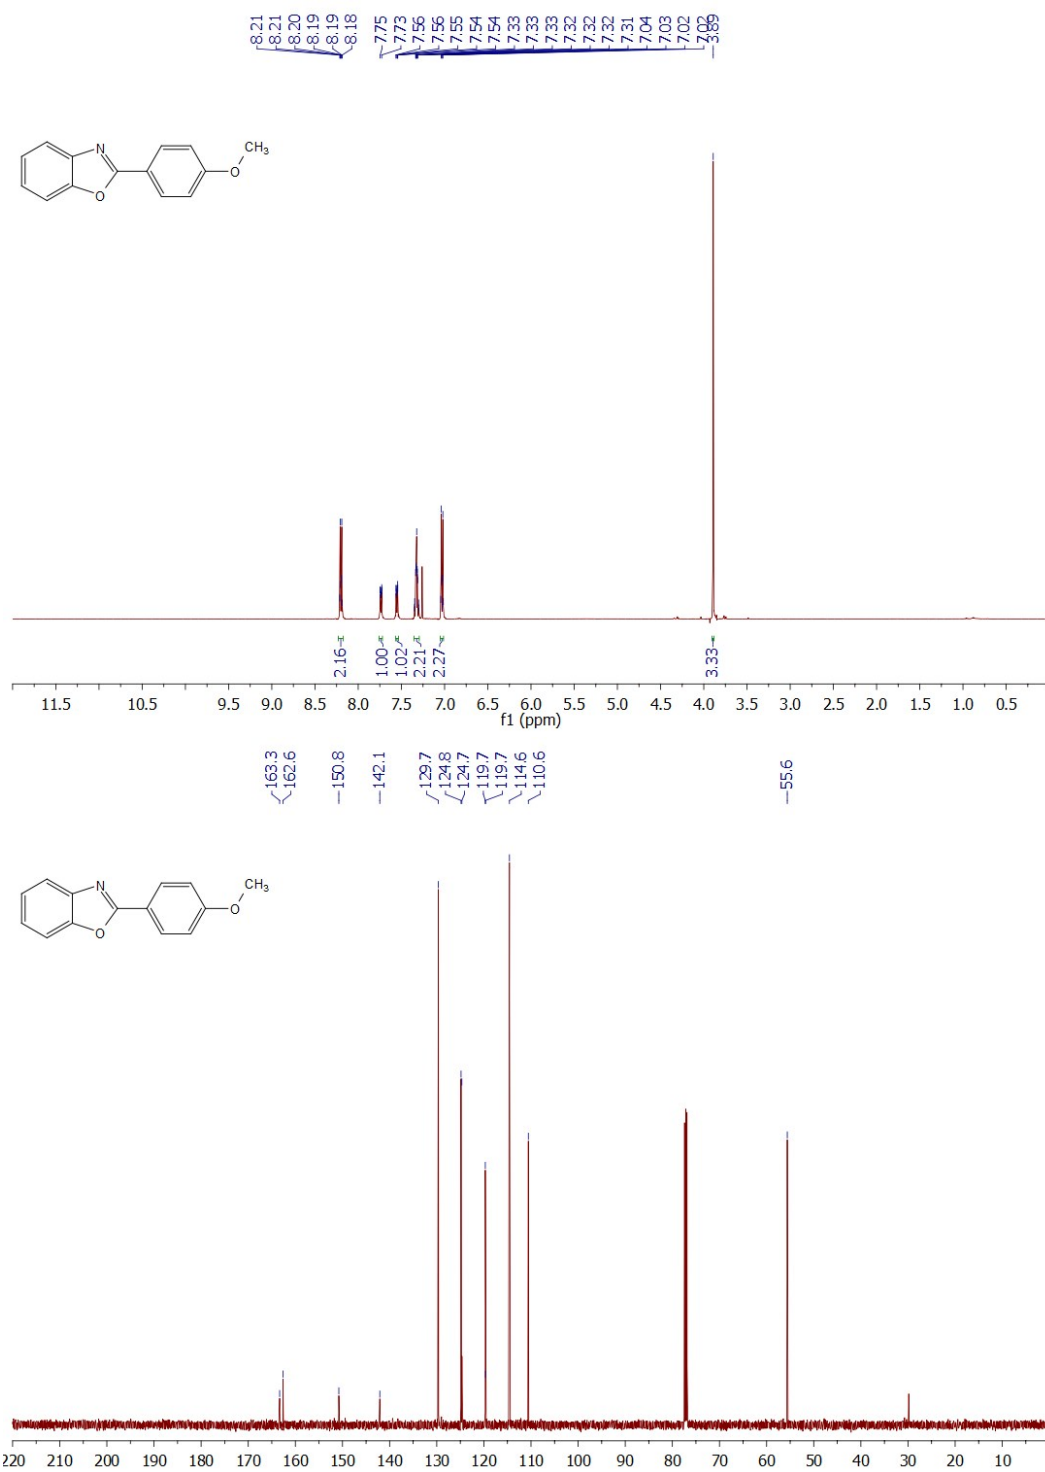

**Figure S6.** <sup>1</sup>H and <sup>13</sup>C NMR spectra of 2-(4-methoxyphenyl)benzoxazole

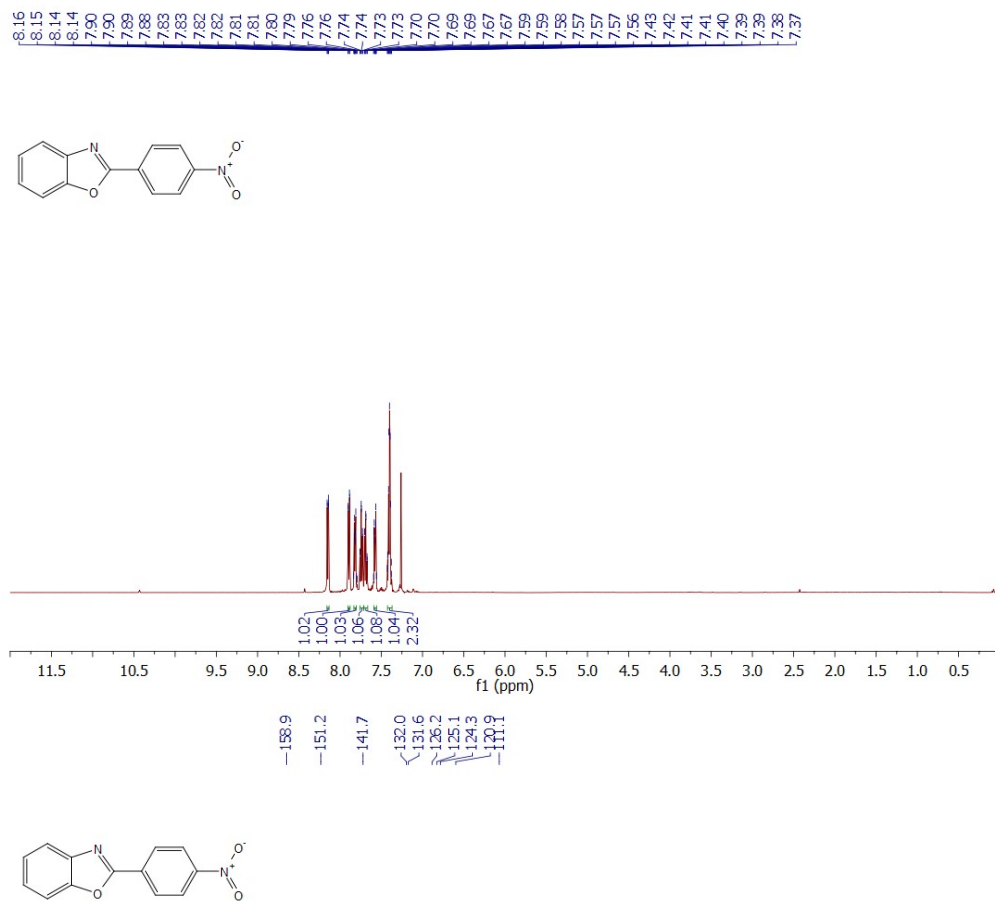

**Figure S7.** <sup>1</sup>H and <sup>13</sup>C NMR spectra of 2-(4-nitrophenyl)benzoxazole

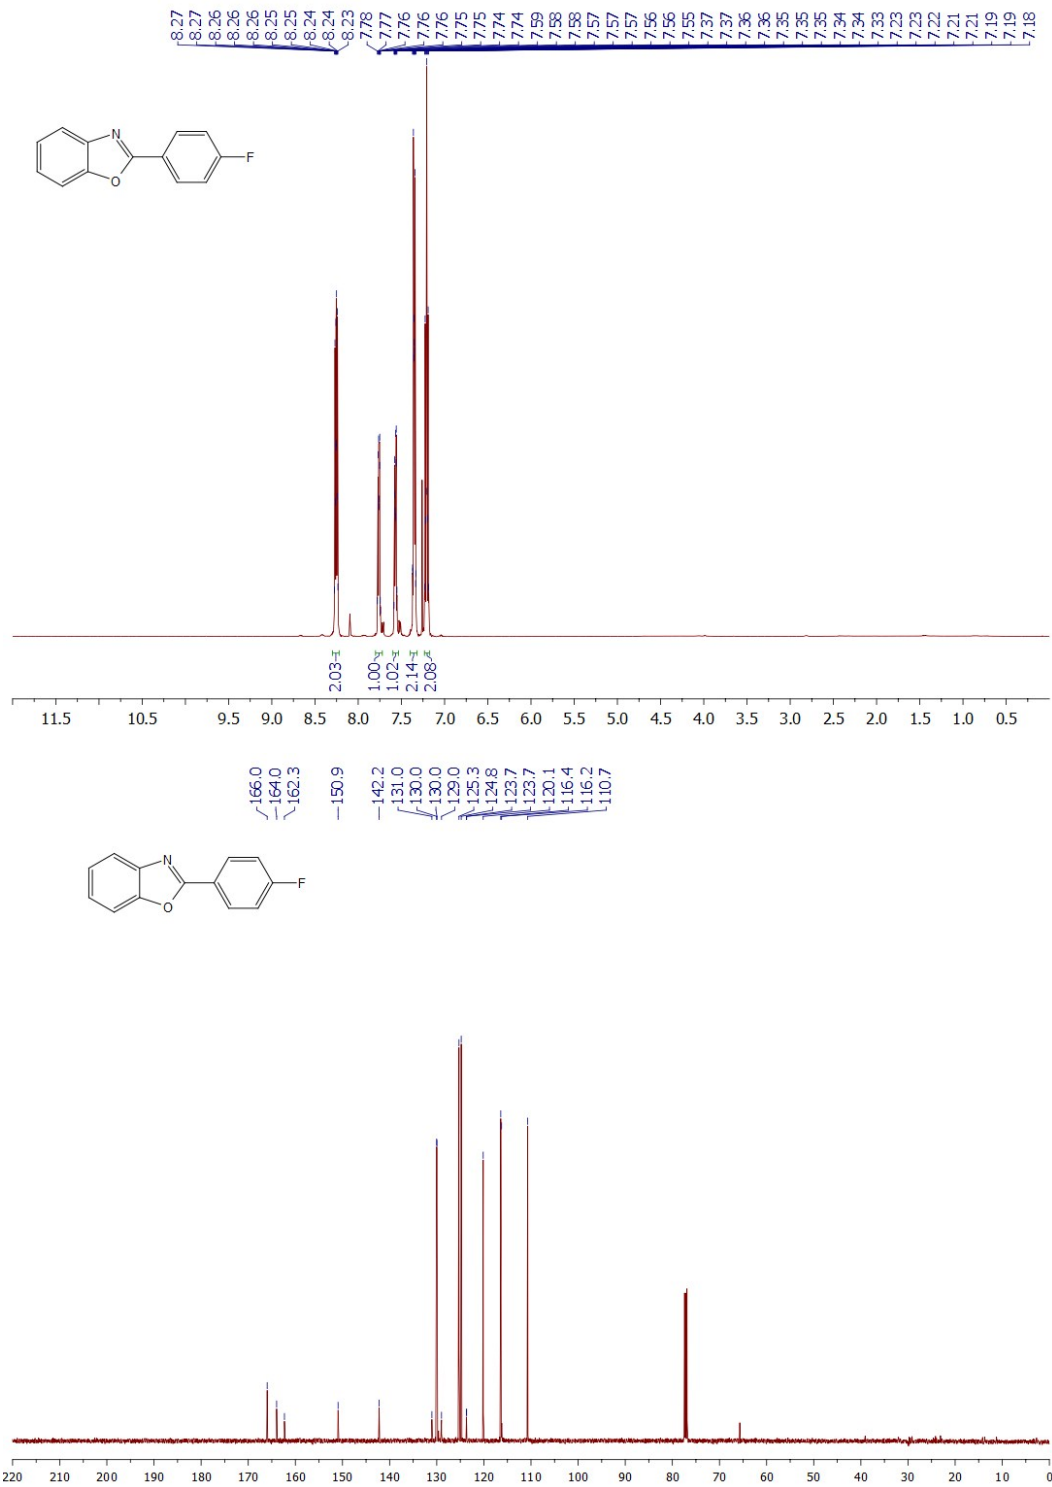

**Figure S8.** <sup>1</sup>H and <sup>13</sup>C NMR spectra of 2-(4-fluorophenyl)benzoxazole

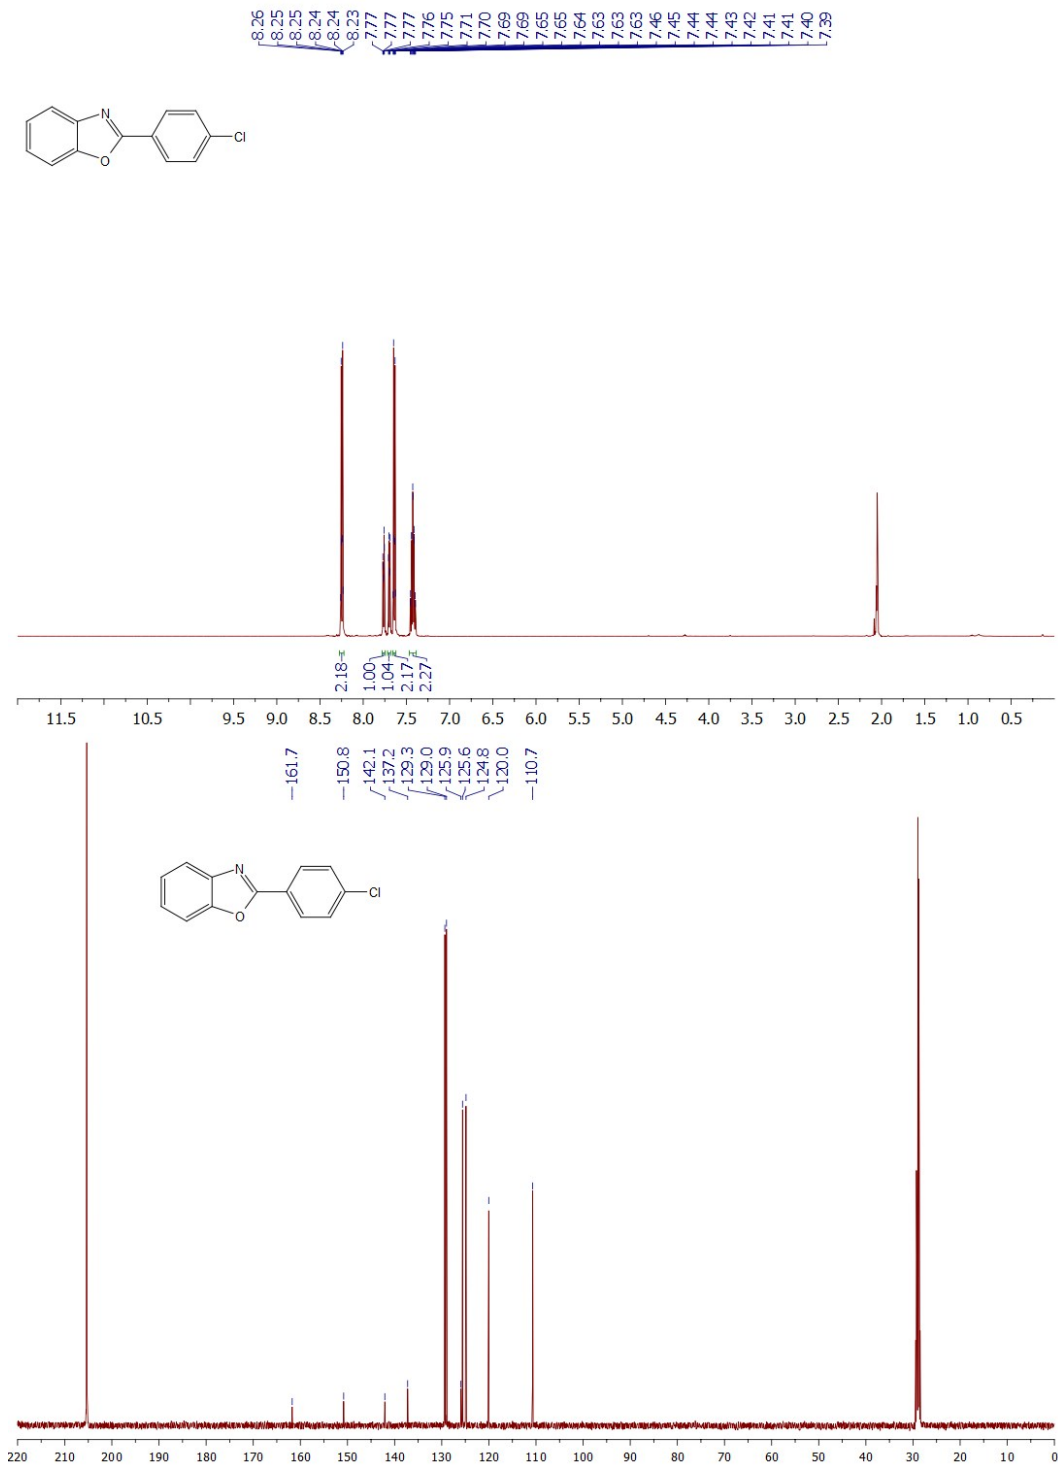

**Figure S9.** <sup>1</sup>H and <sup>13</sup>C NMR spectra of 2-(4-chlorophenyl)benzoxazole

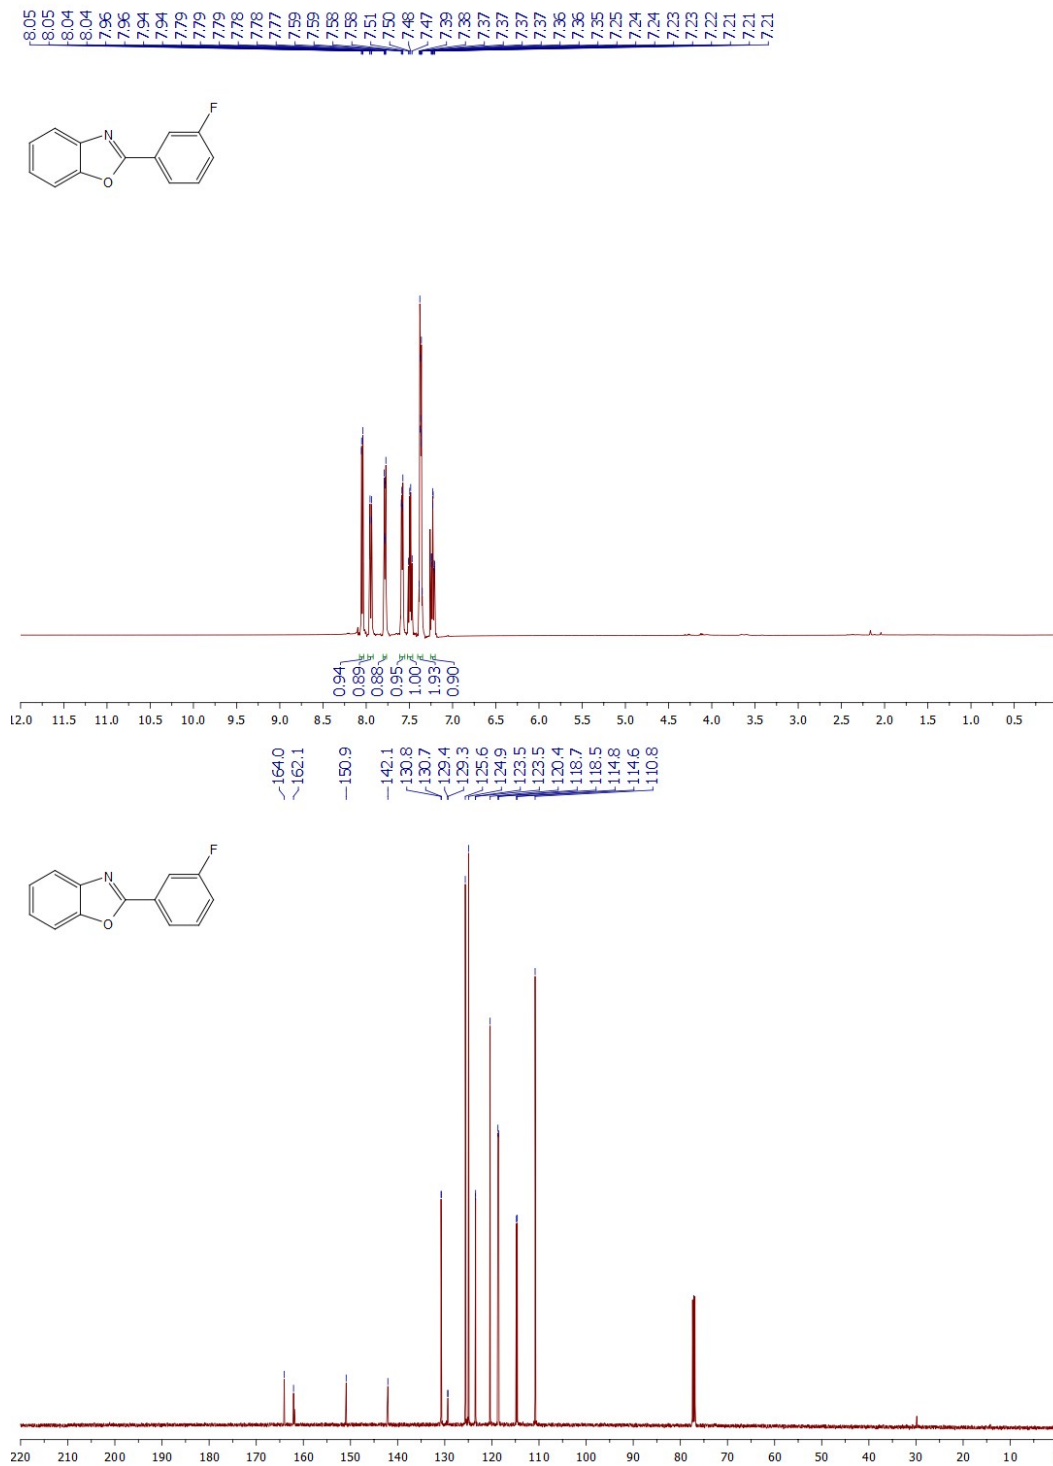

**Figure S10.** <sup>1</sup>H and <sup>13</sup>C NMR spectra of 2-(3-fluorophenyl)benzoxazole

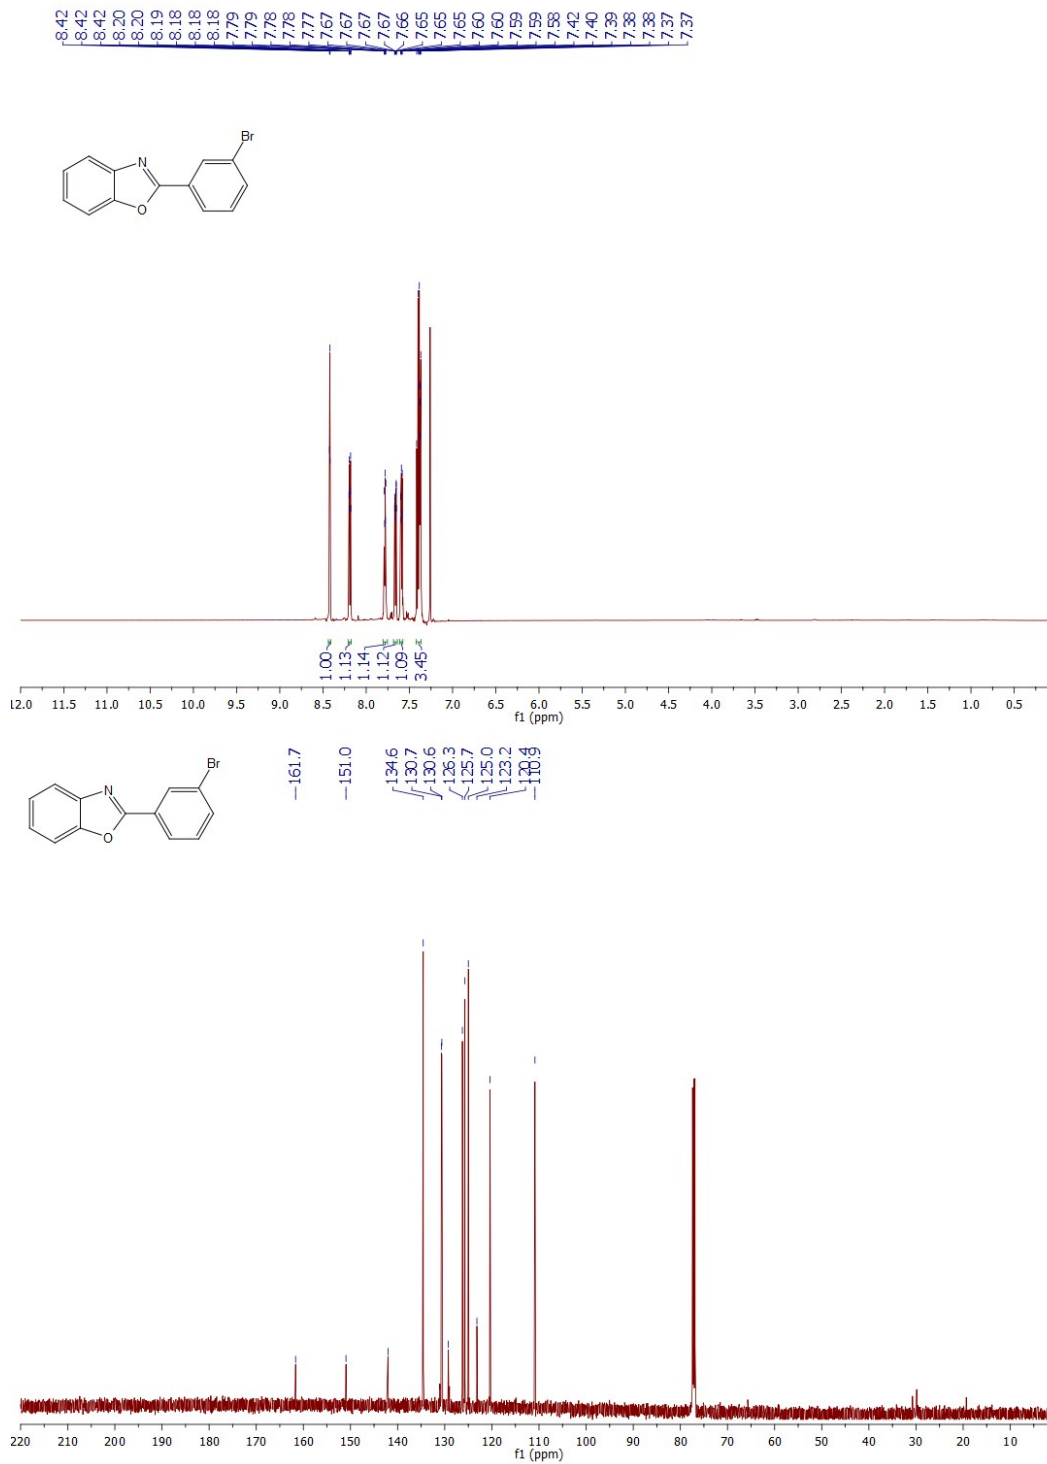

**Figure S11.** <sup>1</sup>H and <sup>13</sup>C NMR spectra of 2-(3-bromophenyl)benzoxazole

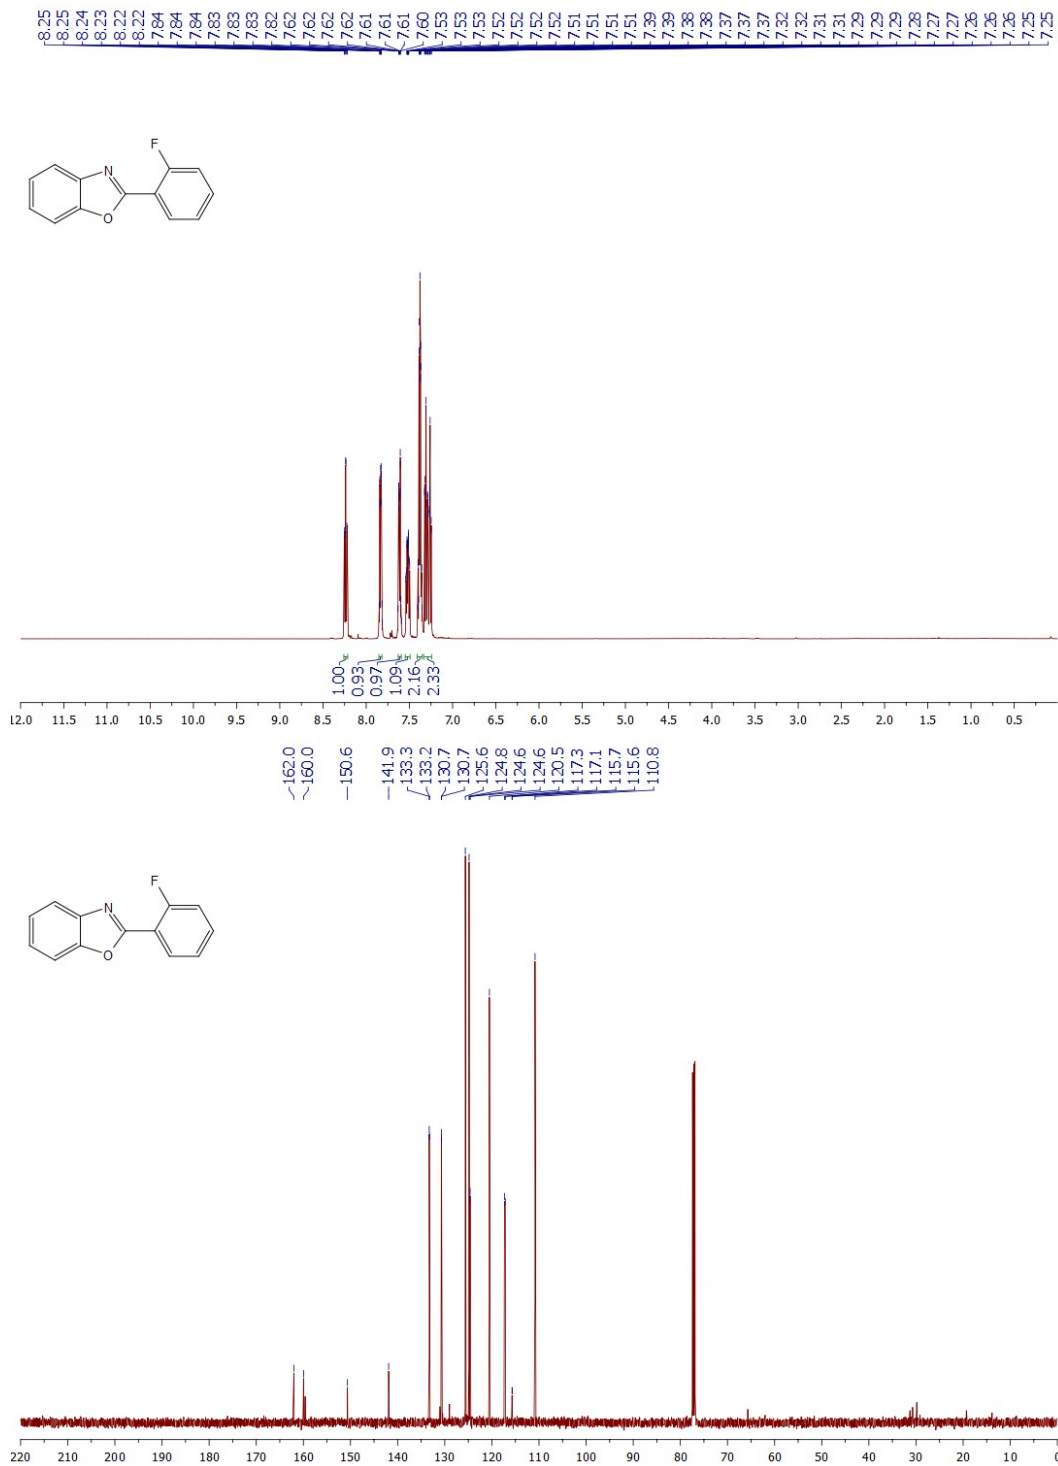

**Figure S12.** <sup>1</sup>H and <sup>13</sup>C NMR spectra of 2-(2-fluorophenyl)benzoxazole



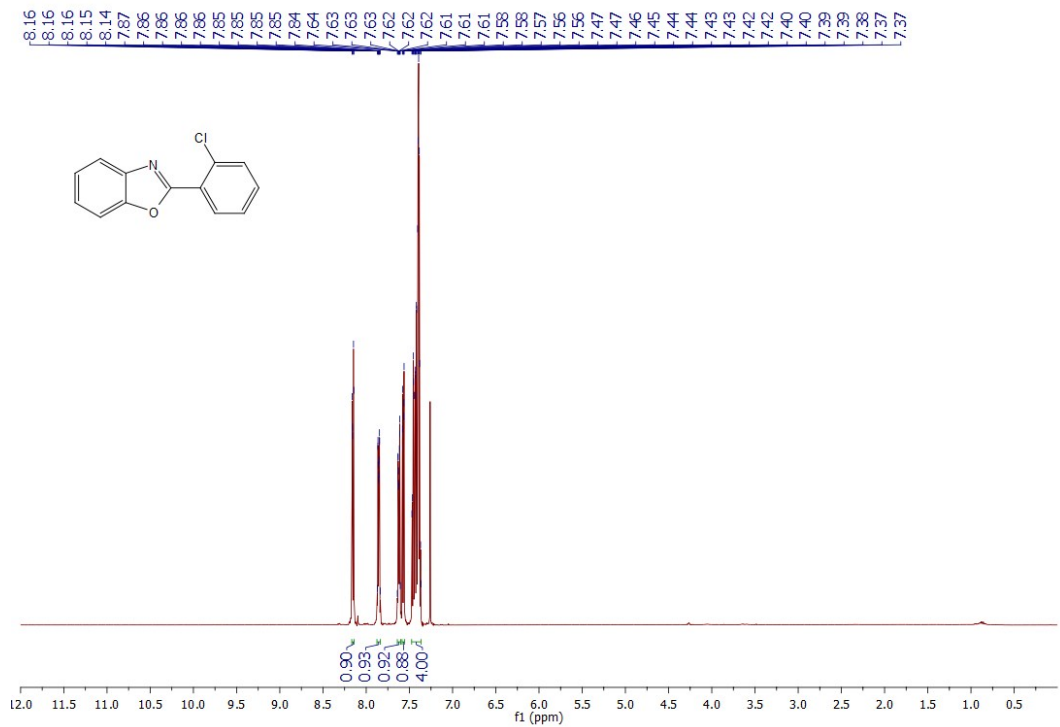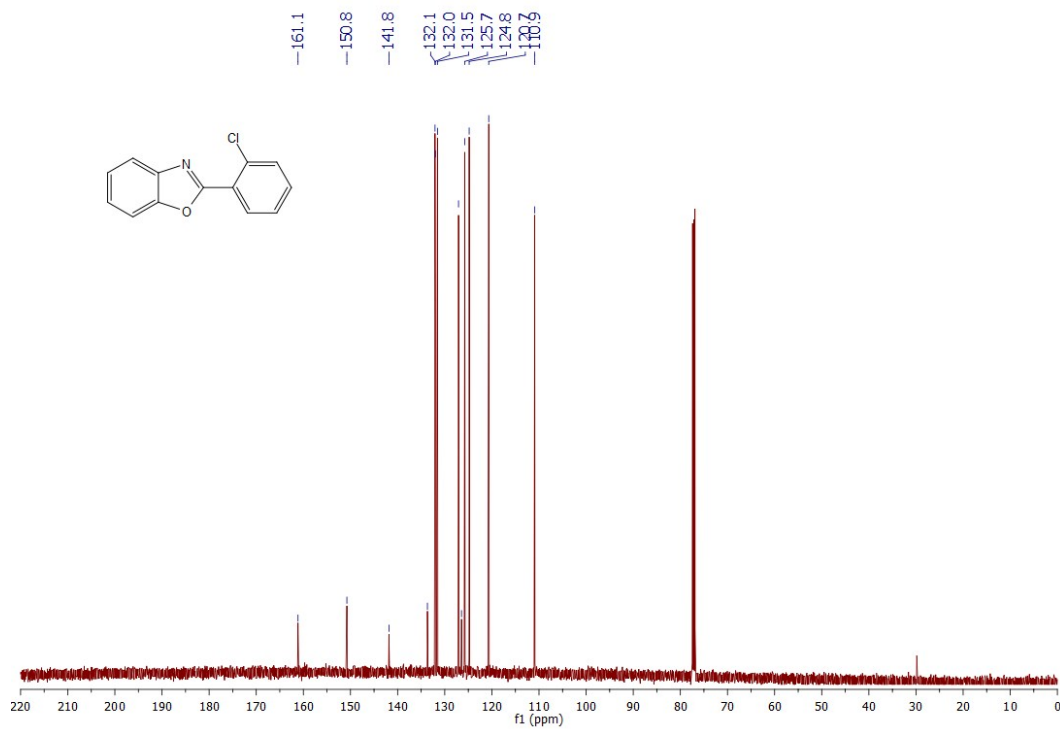

**Figure S13.** <sup>1</sup>H and <sup>13</sup>C NMR spectra of 2-(2-chlorophenyl)benzoxazole

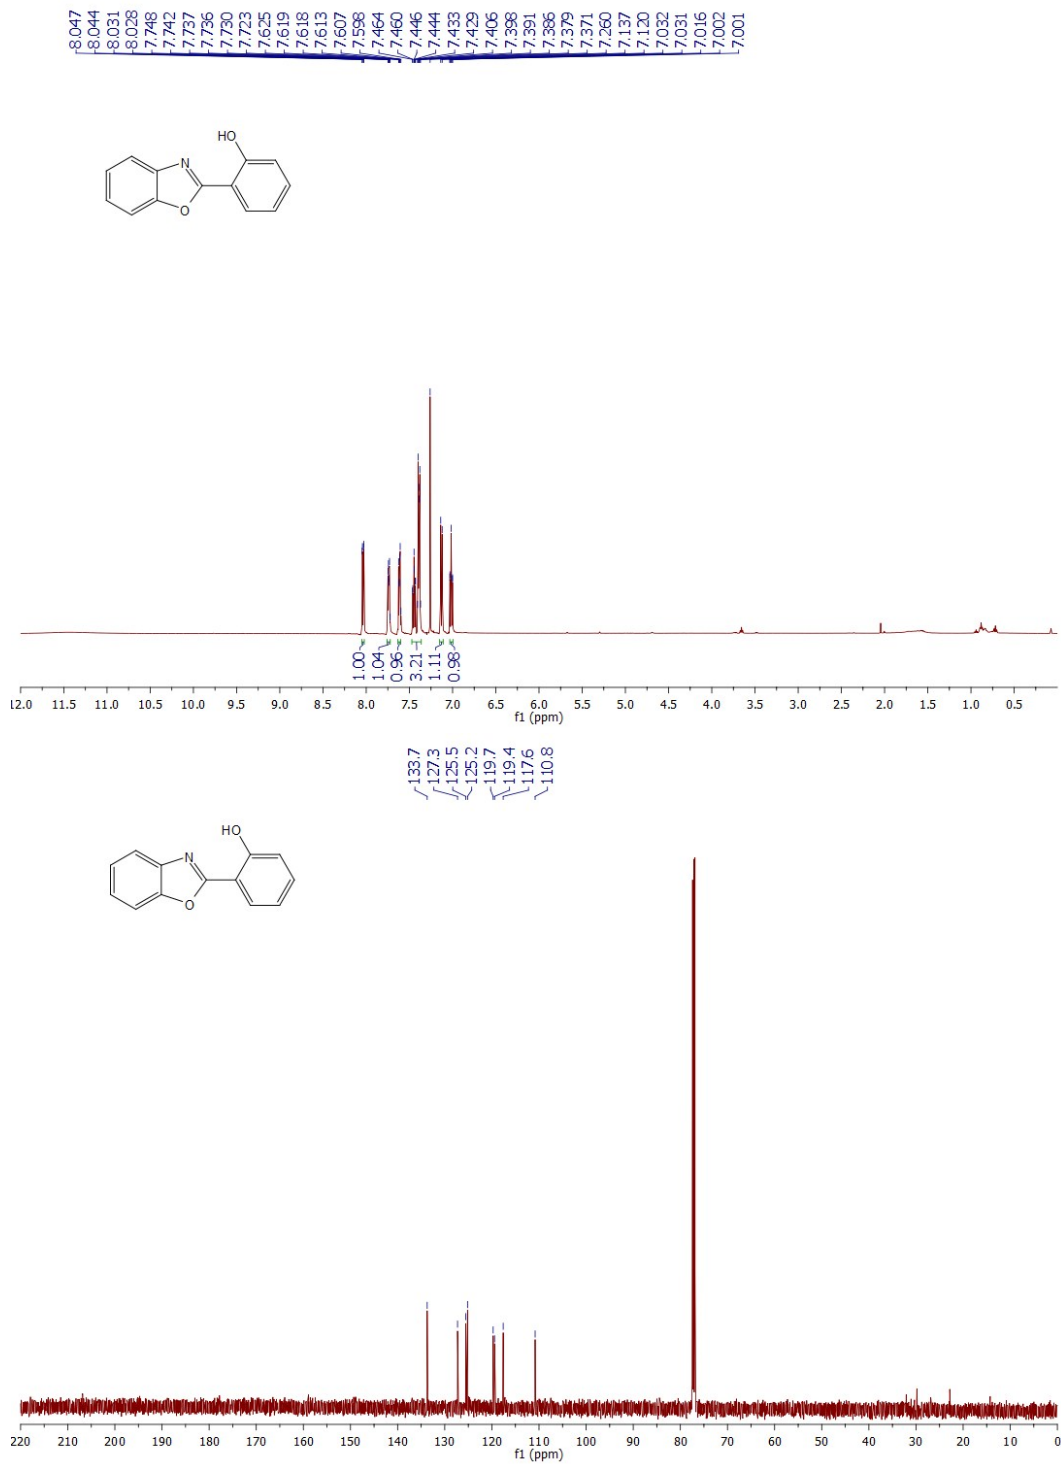

**Figure S14.**  $^1\text{H}$  and  $^{13}\text{C}$  NMR spectra of 2-(2-hydroxyphenyl)benzoxazole

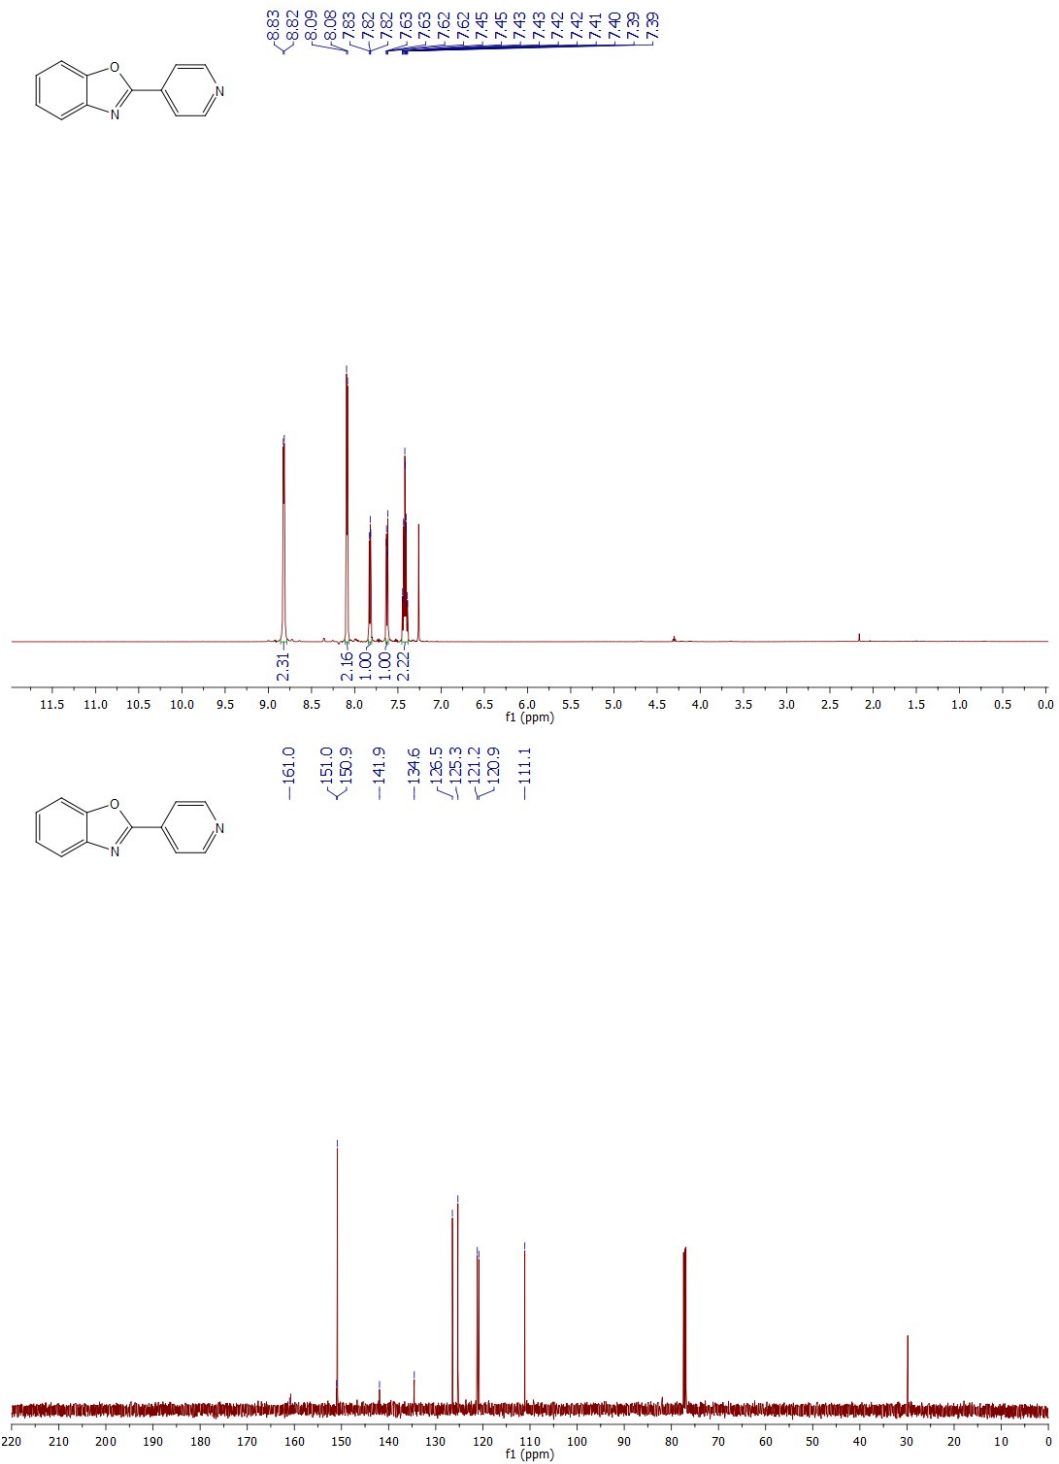

**Figure S15.**  $^1\text{H}$  and  $^{13}\text{C}$  NMR spectra of 2-(pyridine-4-yl)benzoxazole

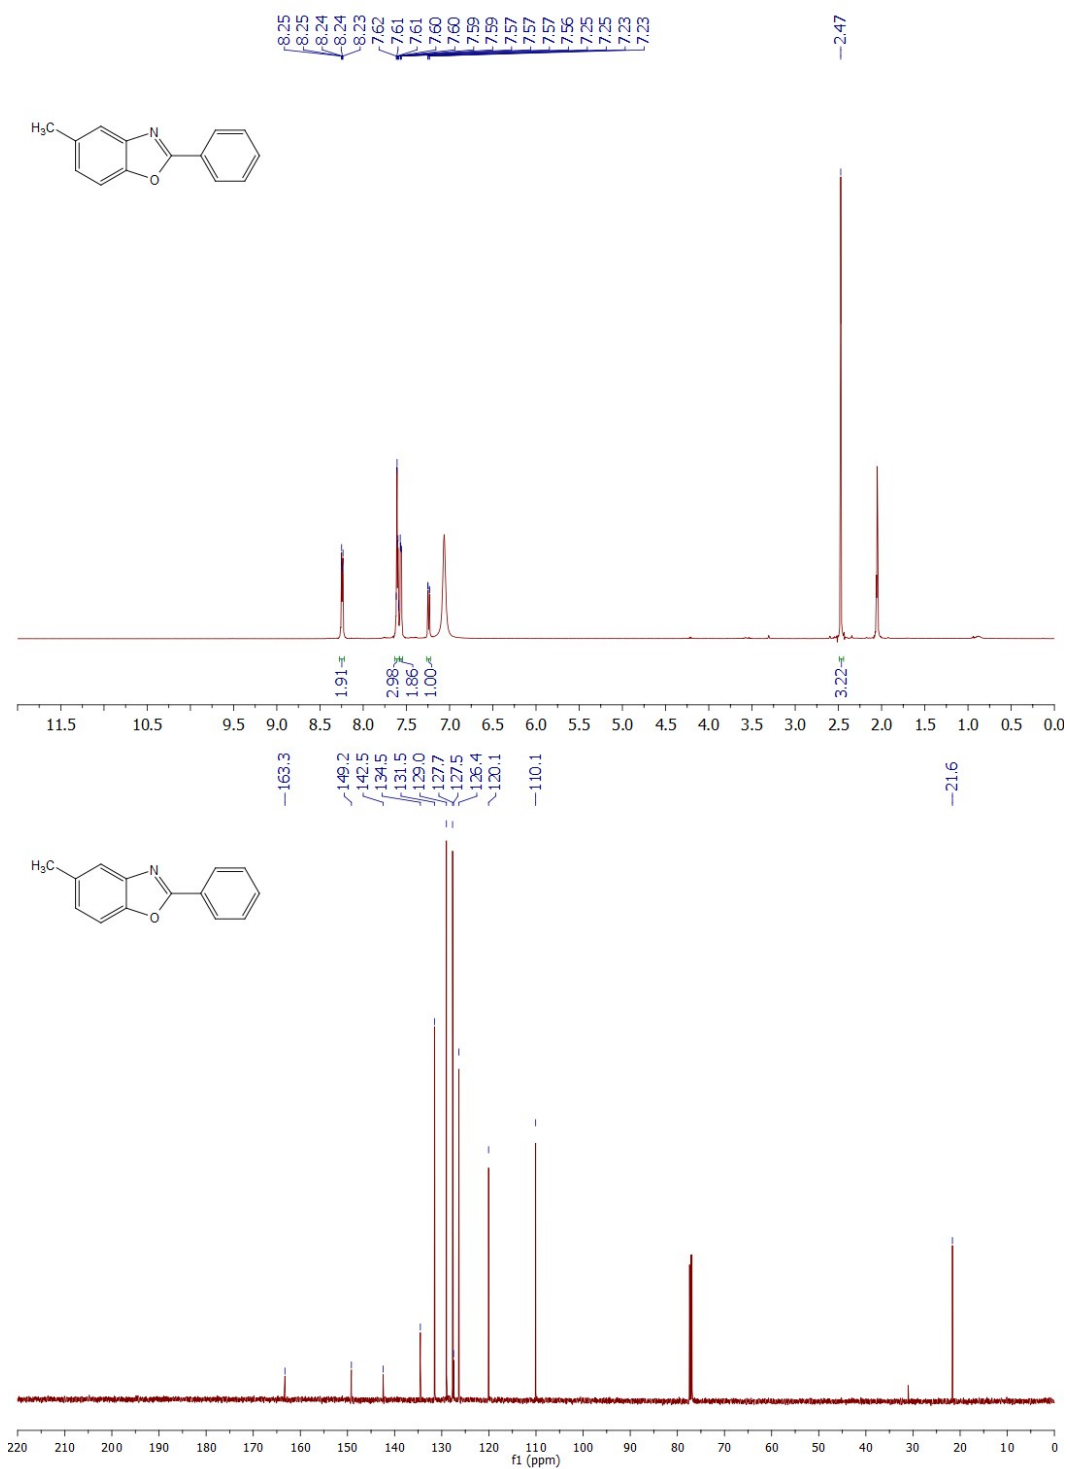

**Figure S16.** <sup>1</sup>H and <sup>13</sup>C NMR spectra of 5-methyl-2-phenylbenzoxazole

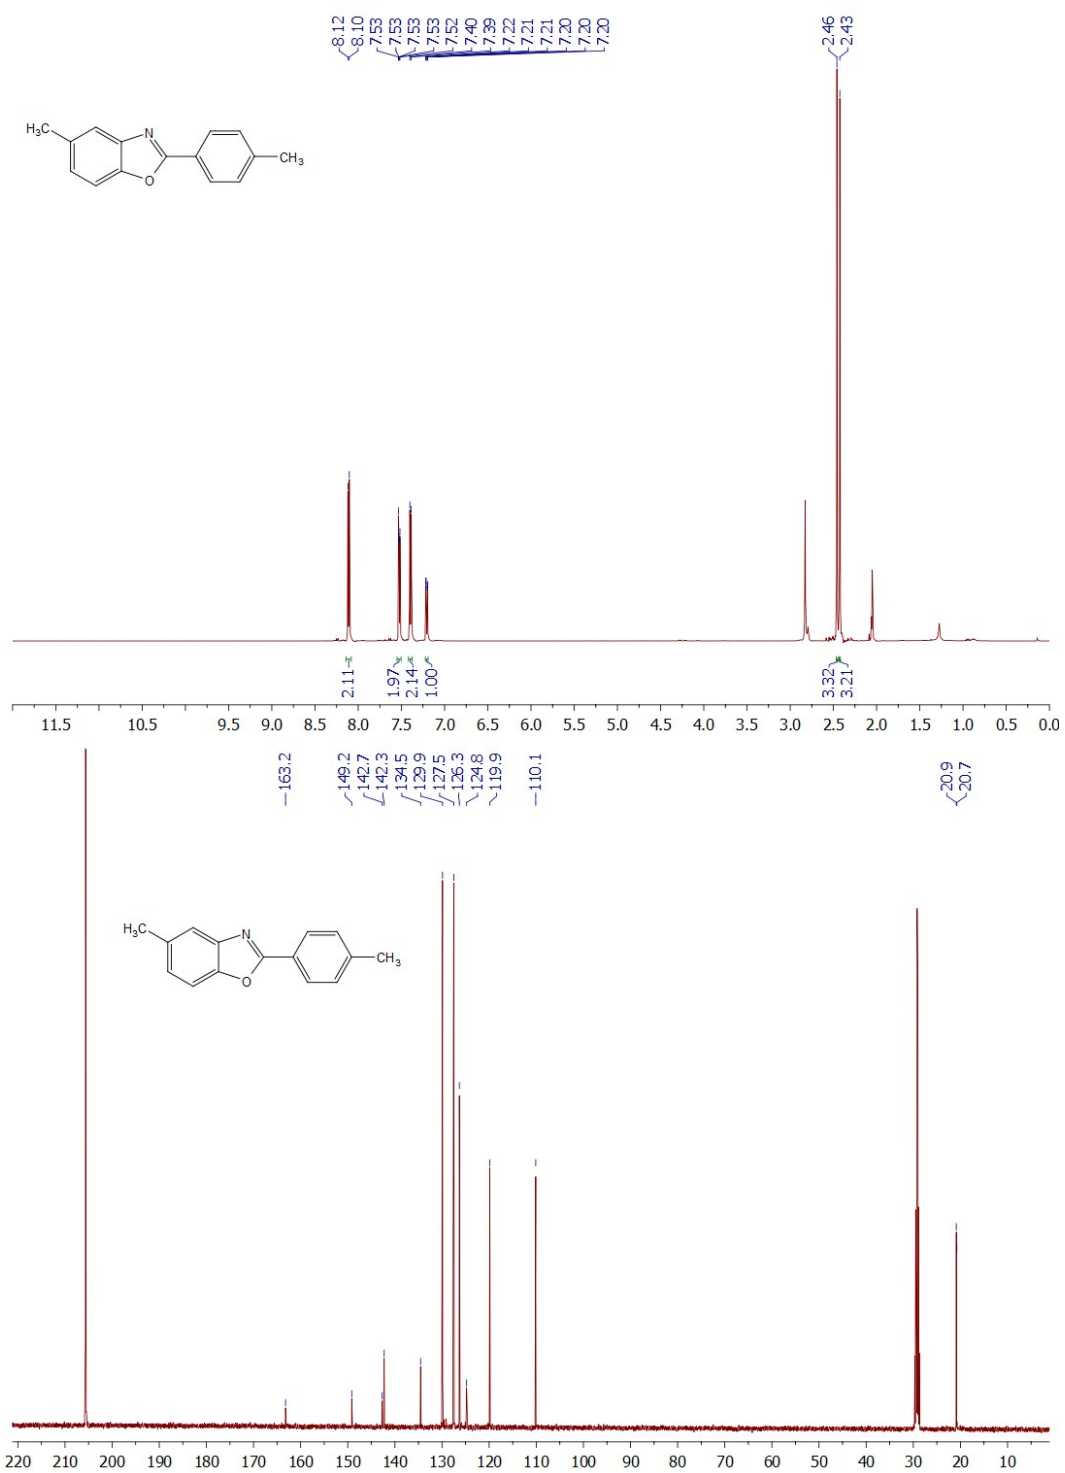

**Figure S17.** <sup>1</sup>H and <sup>13</sup>C NMR spectra of 5-methyl-2-(*p*-tolyl)benzoxazole

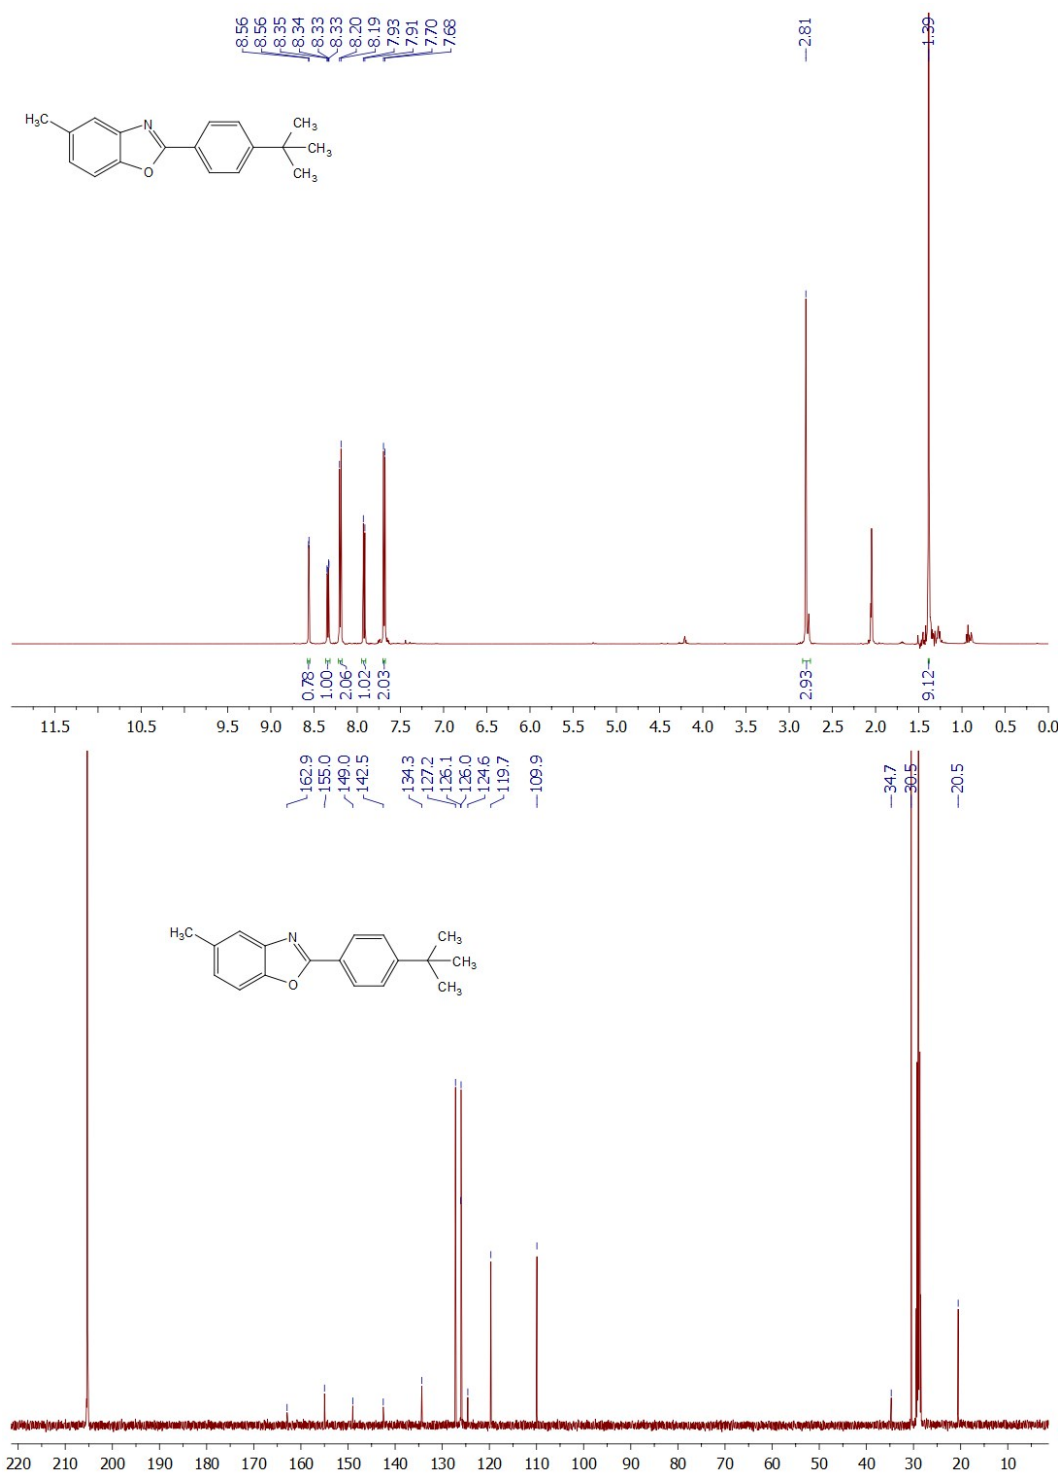

**Figure S18.** <sup>1</sup>H and <sup>13</sup>C NMR spectra of 5-methyl-2-(4-*tert*-butylphenyl)benzoxazole

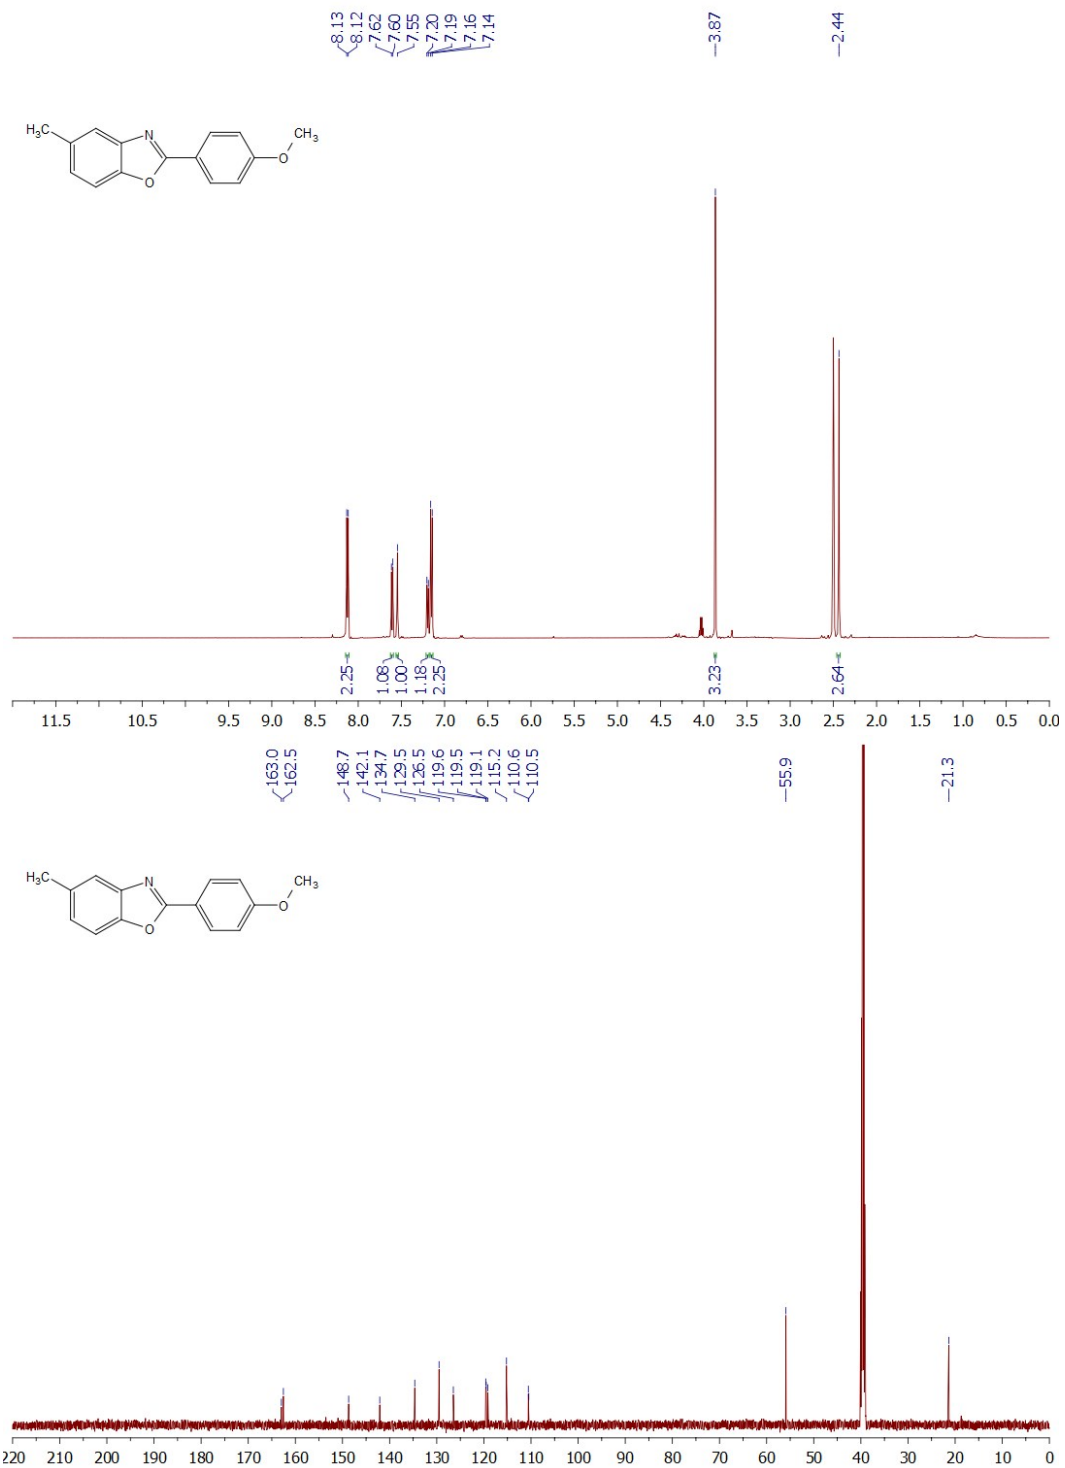

**Figure S19.** <sup>1</sup>H and <sup>13</sup>C NMR spectra of 5-methyl-2-(4-methoxyphenyl)benzoxazole

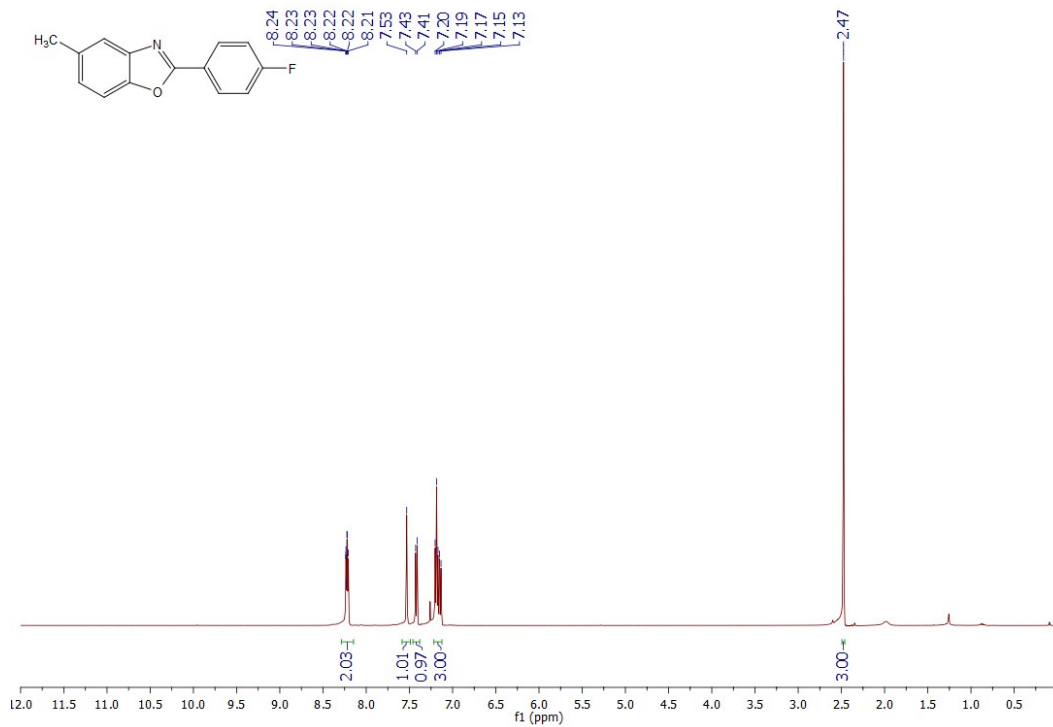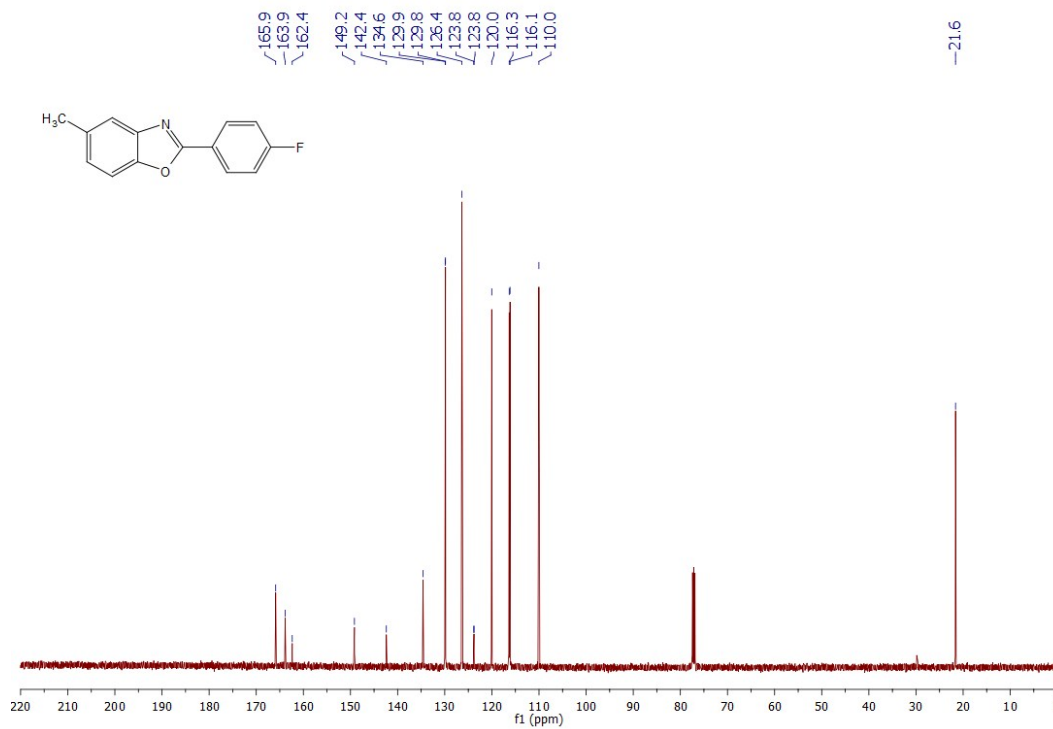

**Figure S20.** <sup>1</sup>H and <sup>13</sup>C NMR spectra of 5-methyl-2-(4-fluorophenyl)benzoxazole



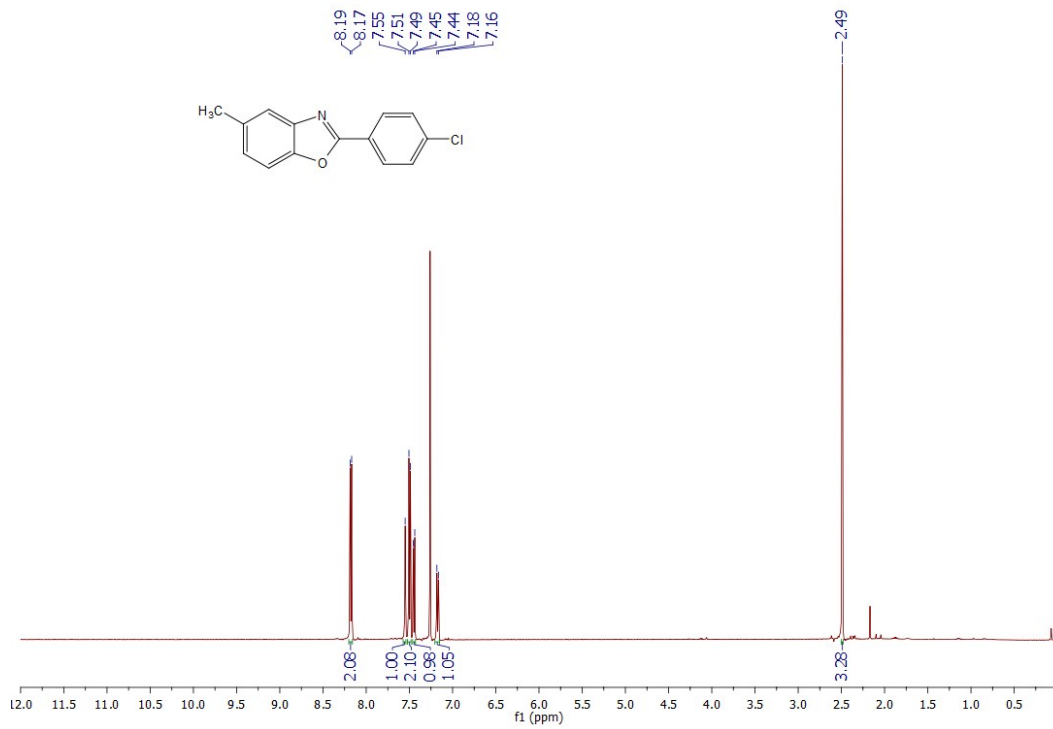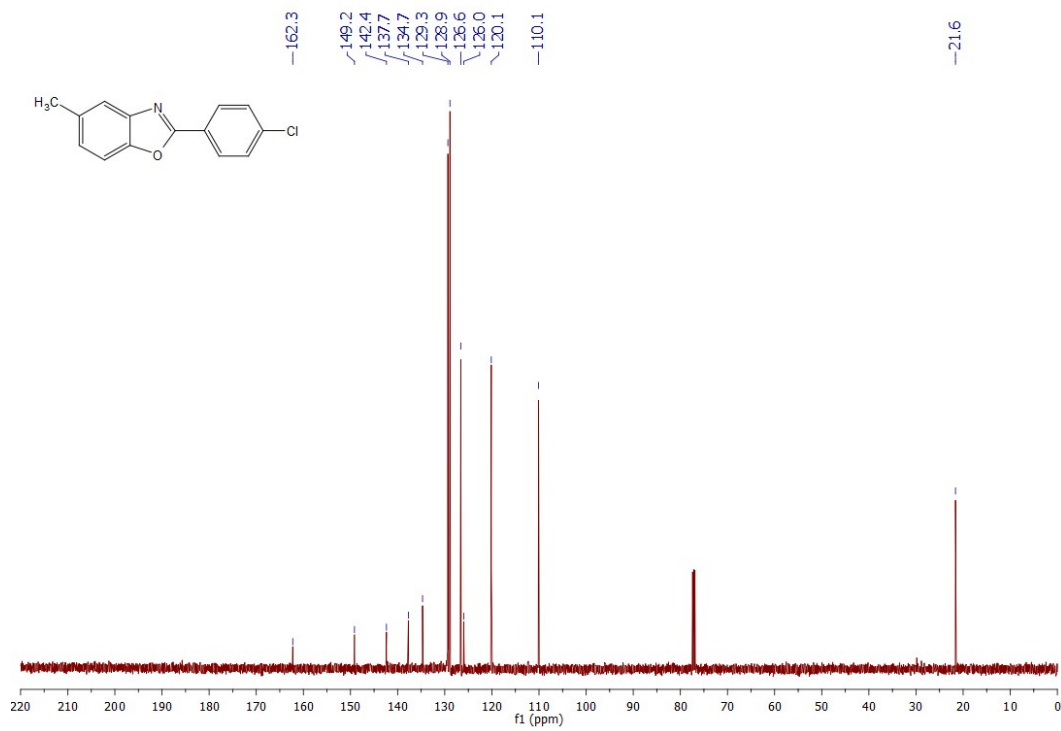

**Figure S21.** <sup>1</sup>H and <sup>13</sup>C NMR spectra of 5-methyl-2-(4-chlorophenyl)benzoxazole

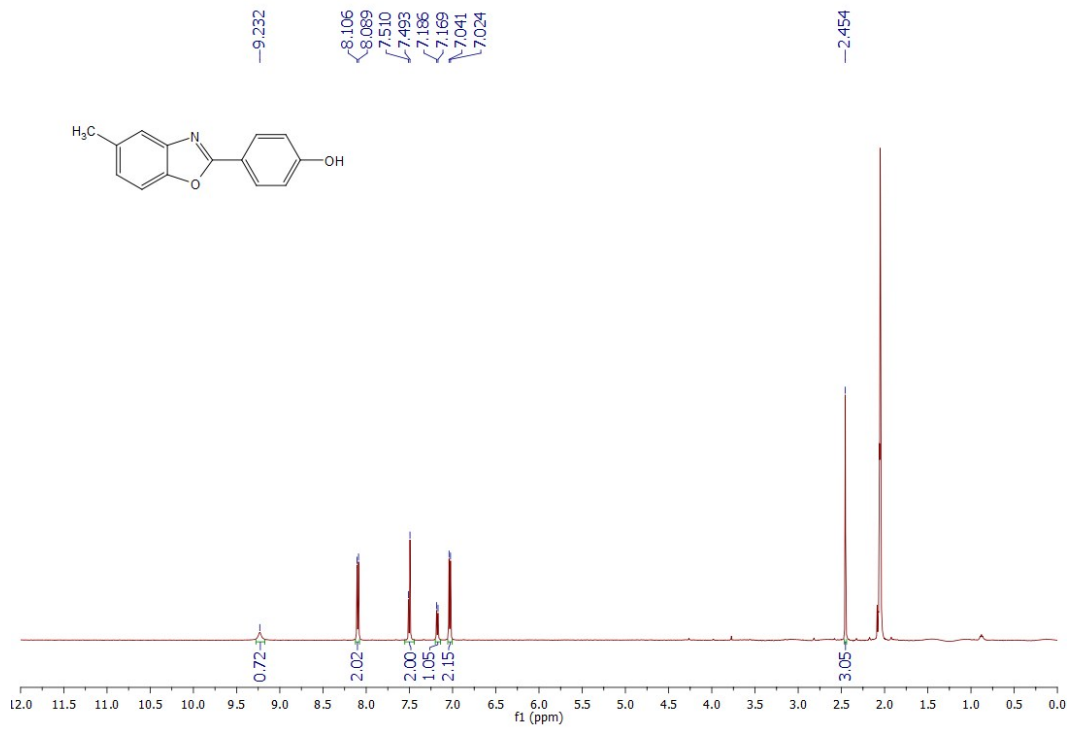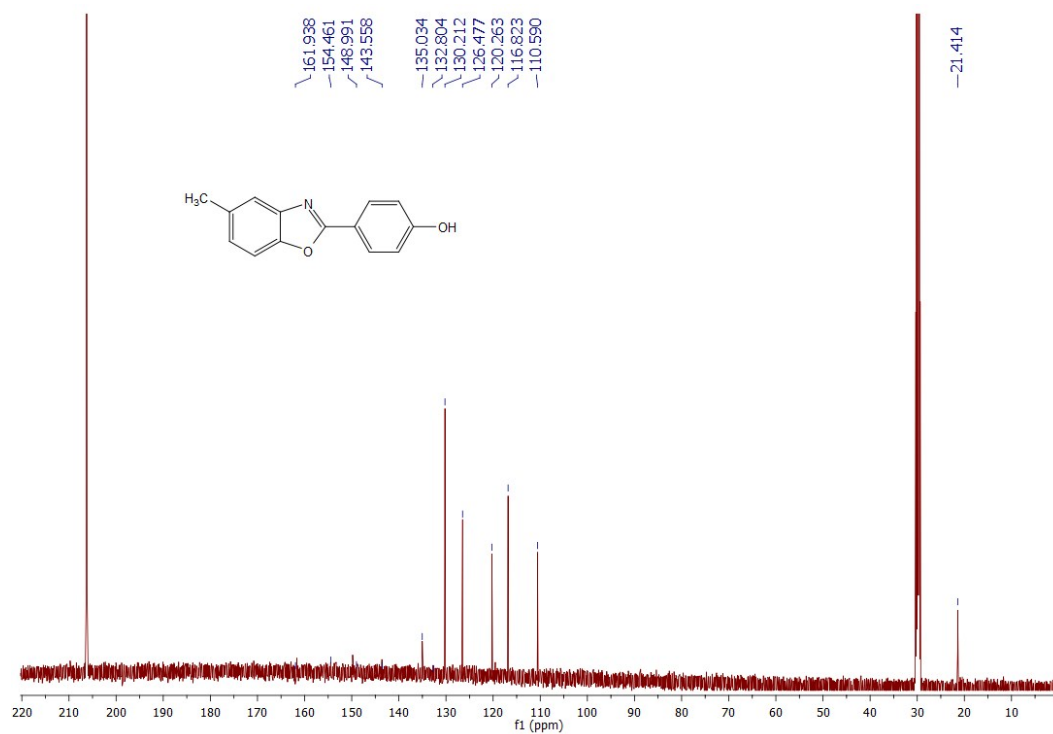

**Figure S22.** <sup>1</sup>H and <sup>13</sup>C NMR spectra of 5-methyl-2-(4-hydroxyphenyl)benzoxazole

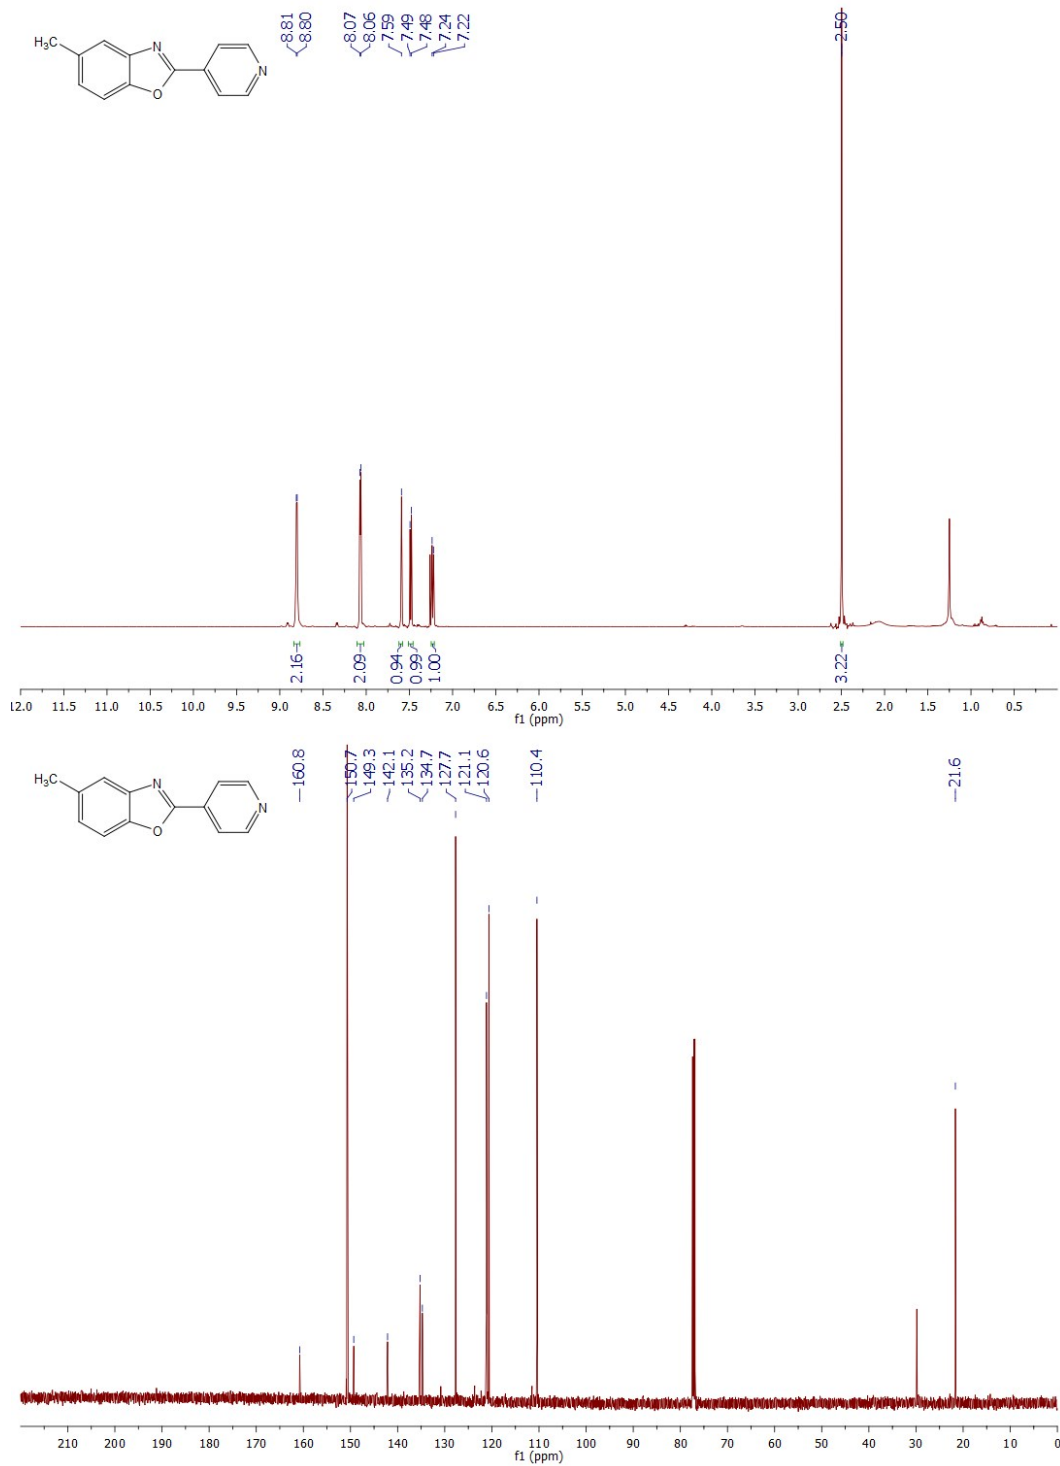

**Figure S23.** <sup>1</sup>H and <sup>13</sup>C NMR spectra of 5-methyl-2-(pyridine-4-yl)benzoxazole

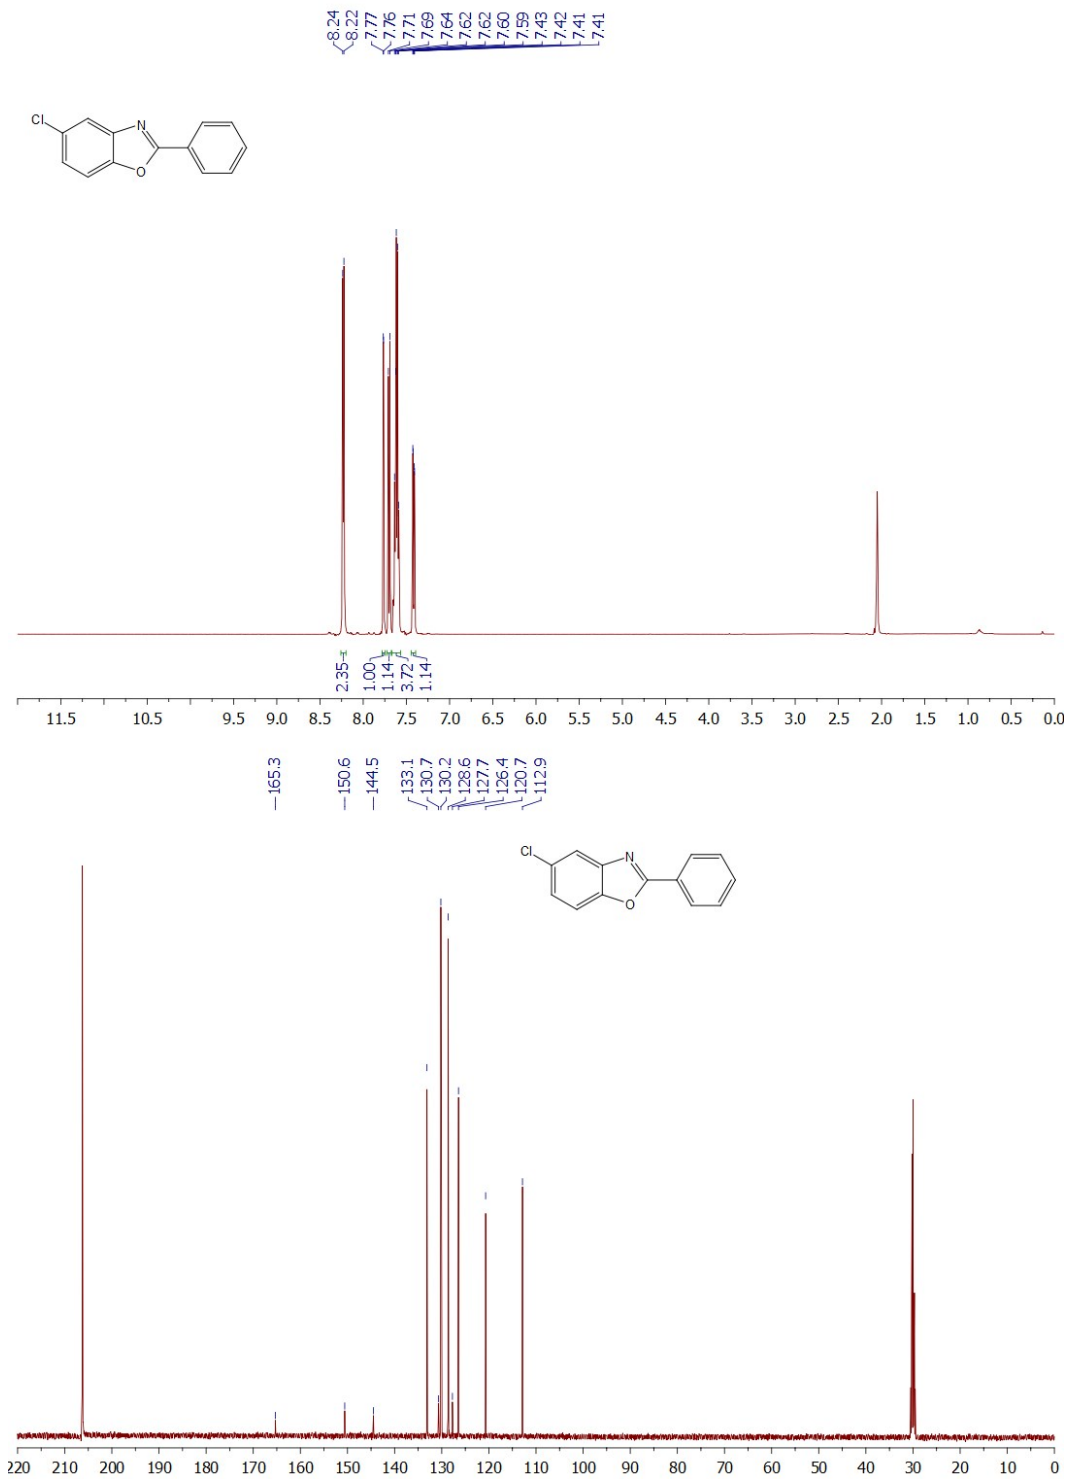

**Figure S24.** <sup>1</sup>H and <sup>13</sup>C NMR spectra of 5-chloro-2-phenylbenzoxazole

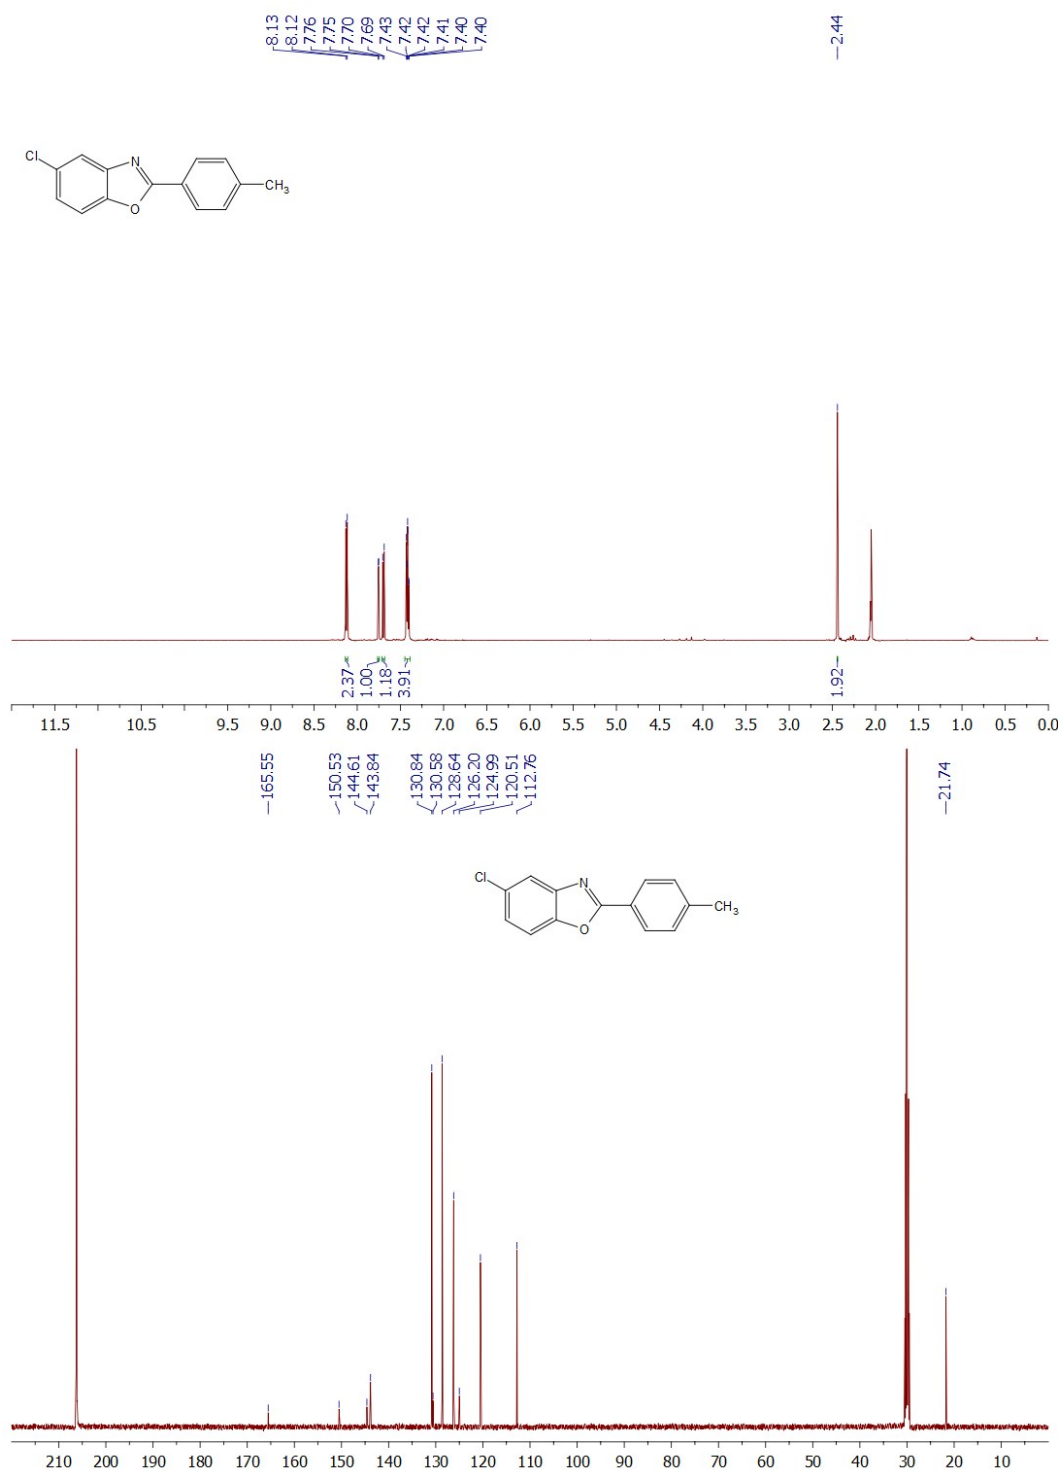

**Figure S25.** <sup>1</sup>H and <sup>13</sup>C NMR spectra of 5-chloro-2-(*p*-tolyl)benzoxazole

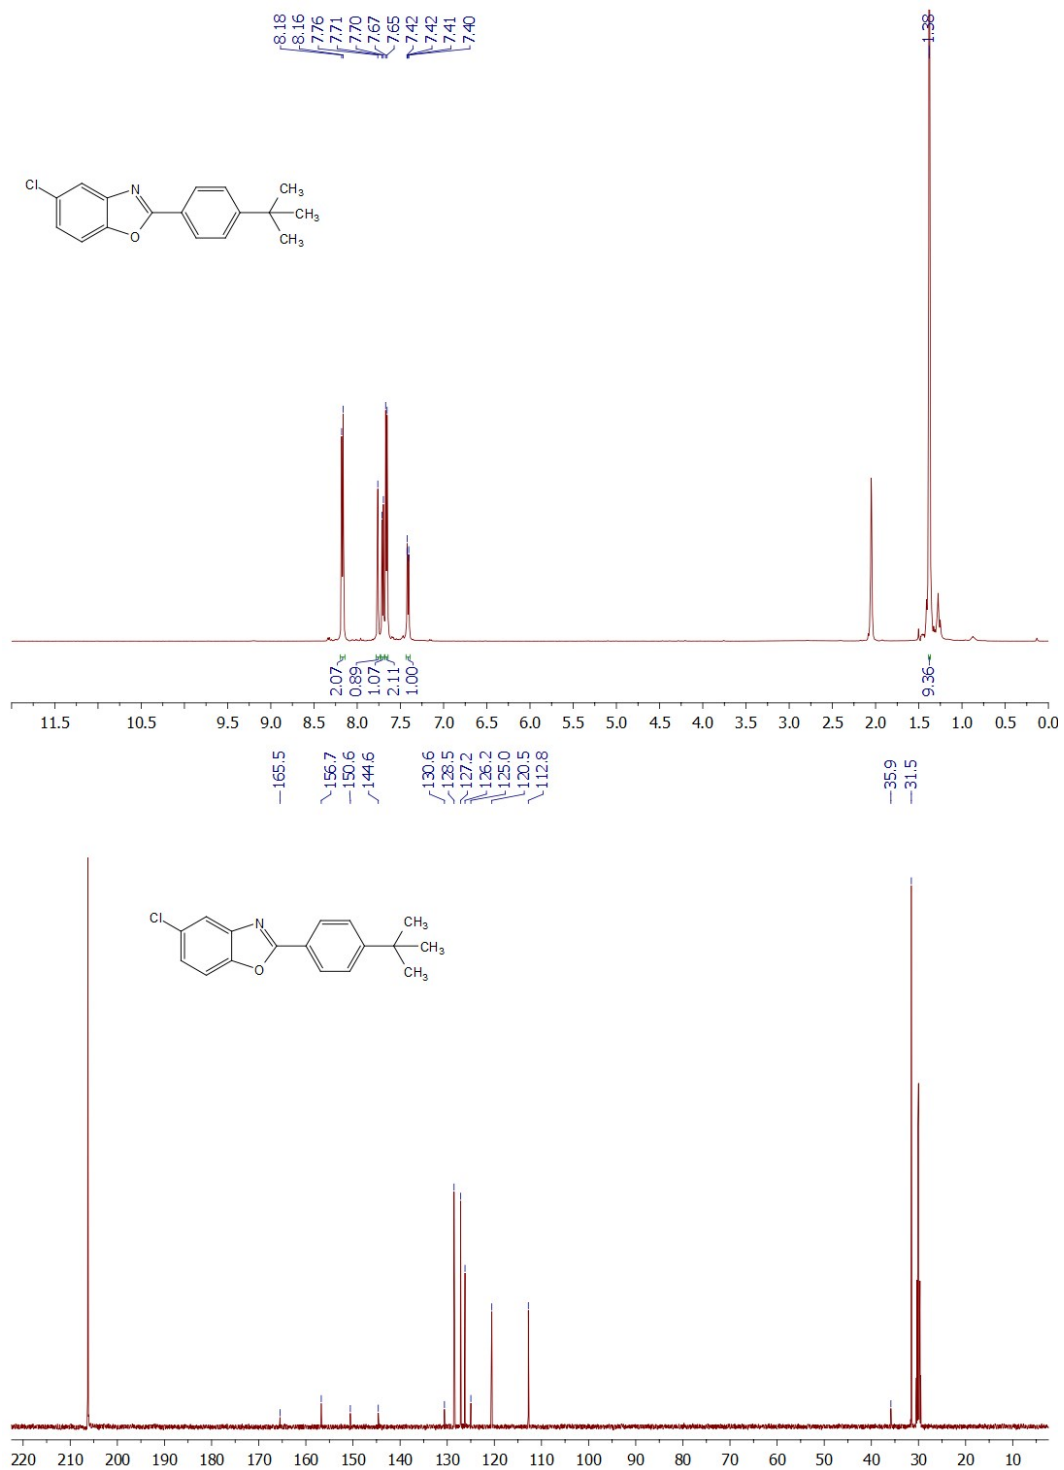

**Figure S26.** <sup>1</sup>H and <sup>13</sup>C NMR spectra of 5-chloro-2-(4-*tert*-butylphenyl)benzoxazole

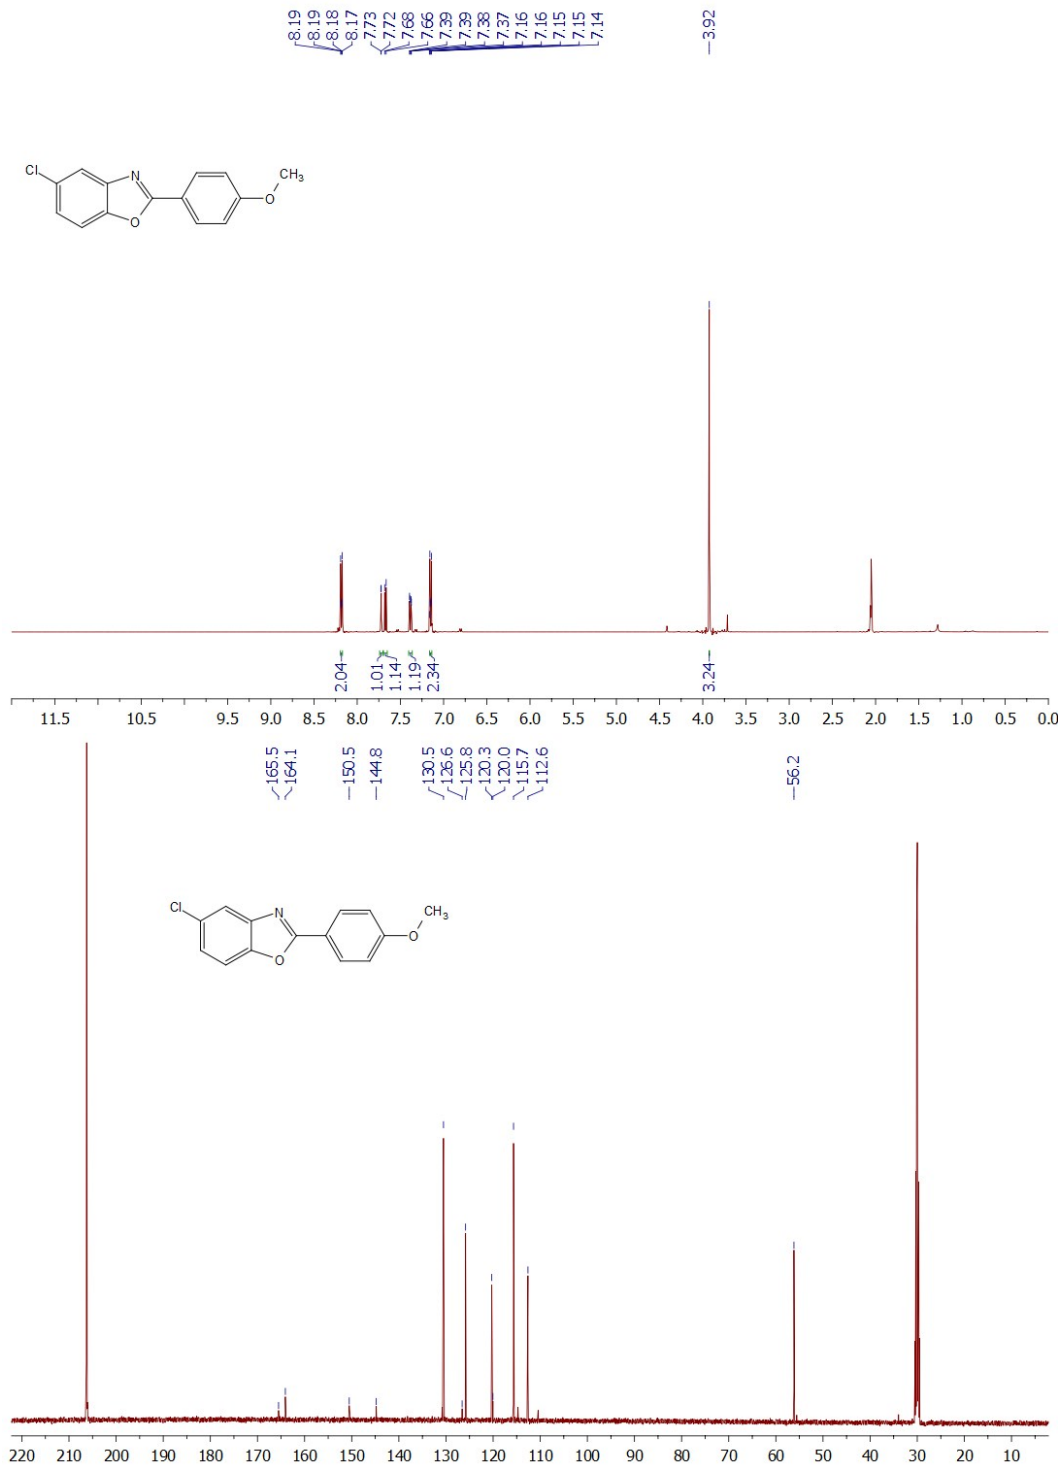

**Figure S27.** <sup>1</sup>H and <sup>13</sup>C NMR spectra of 5-chloro-2-(4-methoxyphenyl)benzoxazole

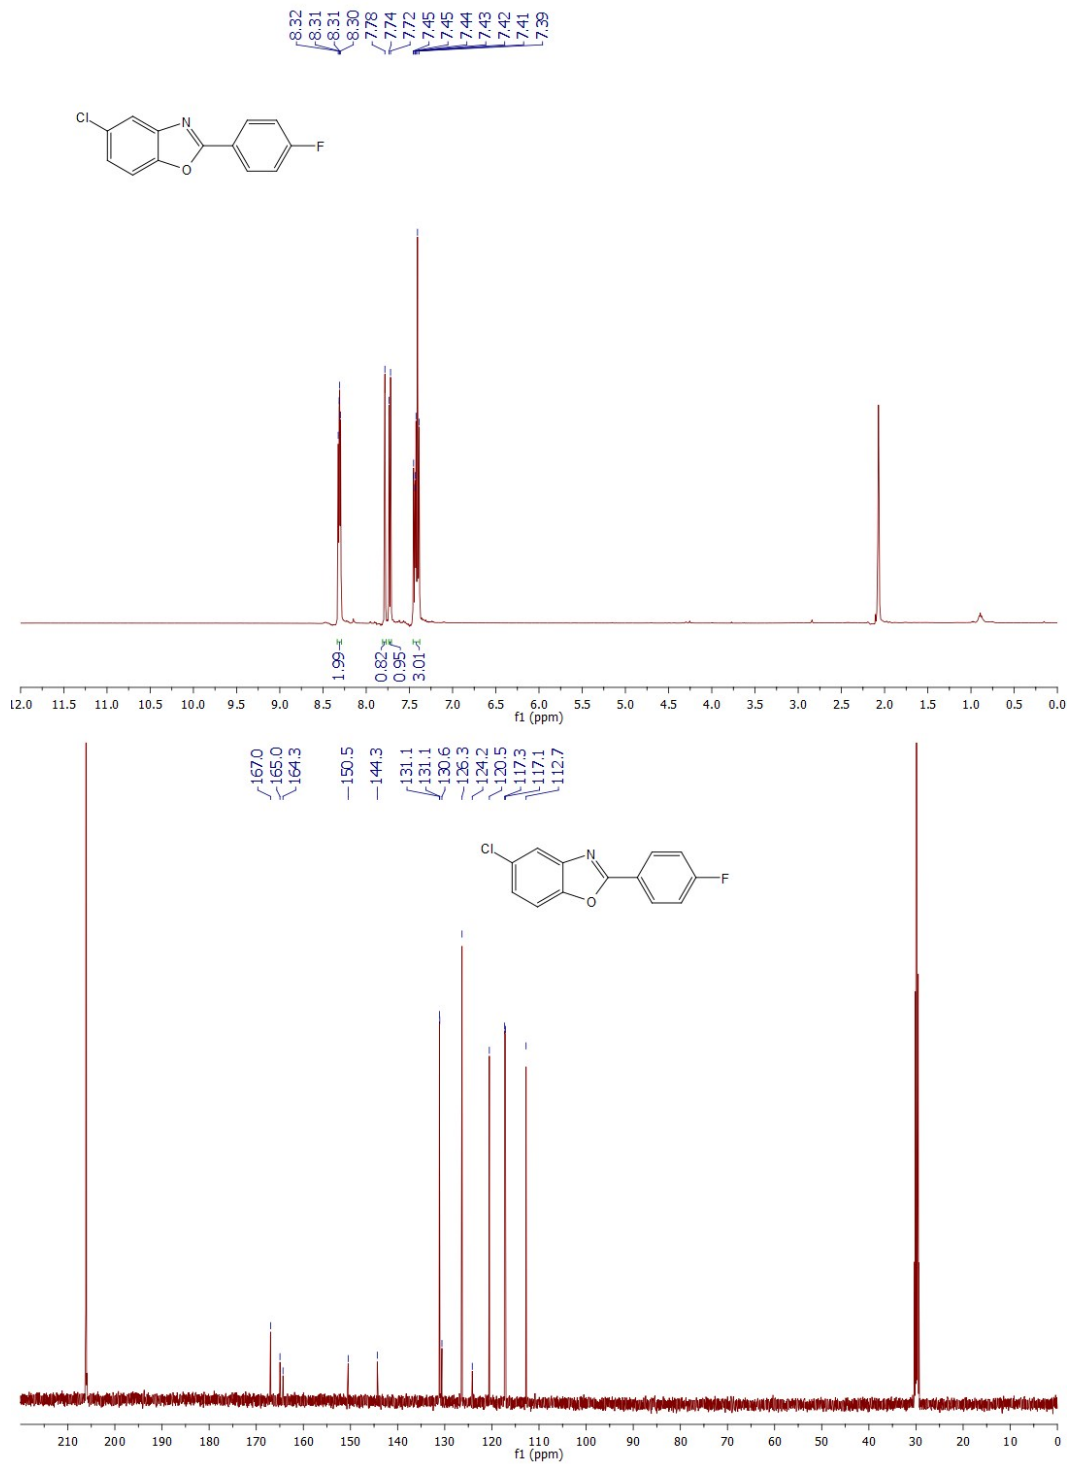

**Figure S28.** <sup>1</sup>H and <sup>13</sup>C NMR spectra of 5-chloro-2-(4-fluorophenyl)benzoxazole



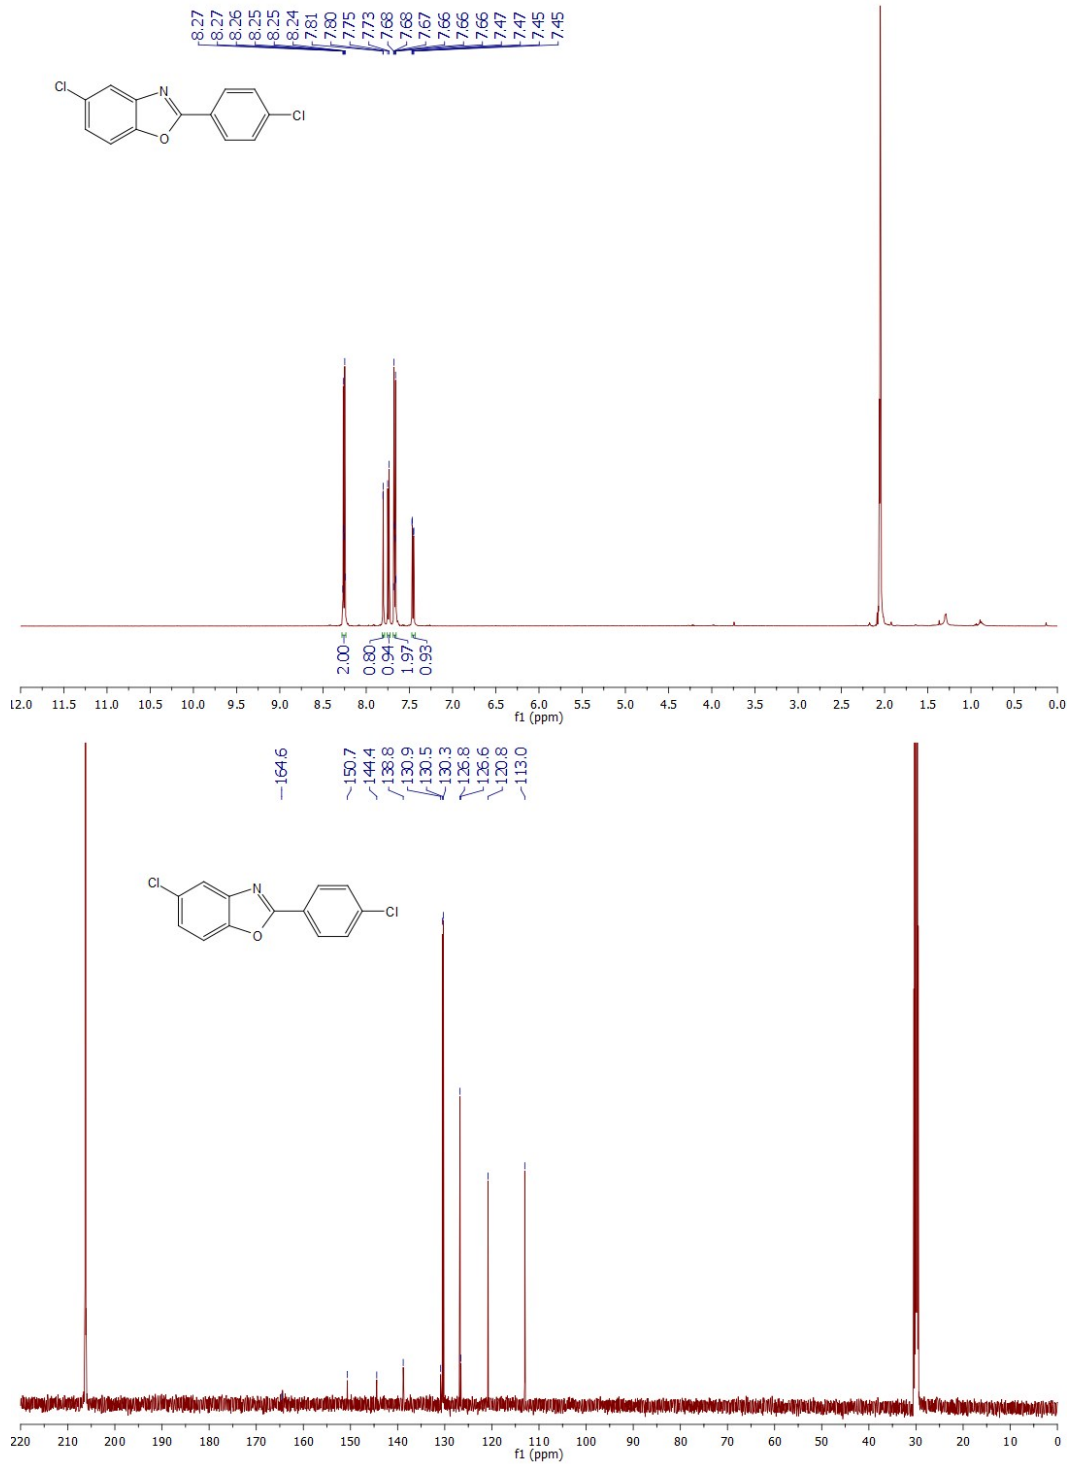

**Figure S29.** <sup>1</sup>H and <sup>13</sup>C NMR spectra 5-chloro-2-(4-chlorophenyl)benzoxazole

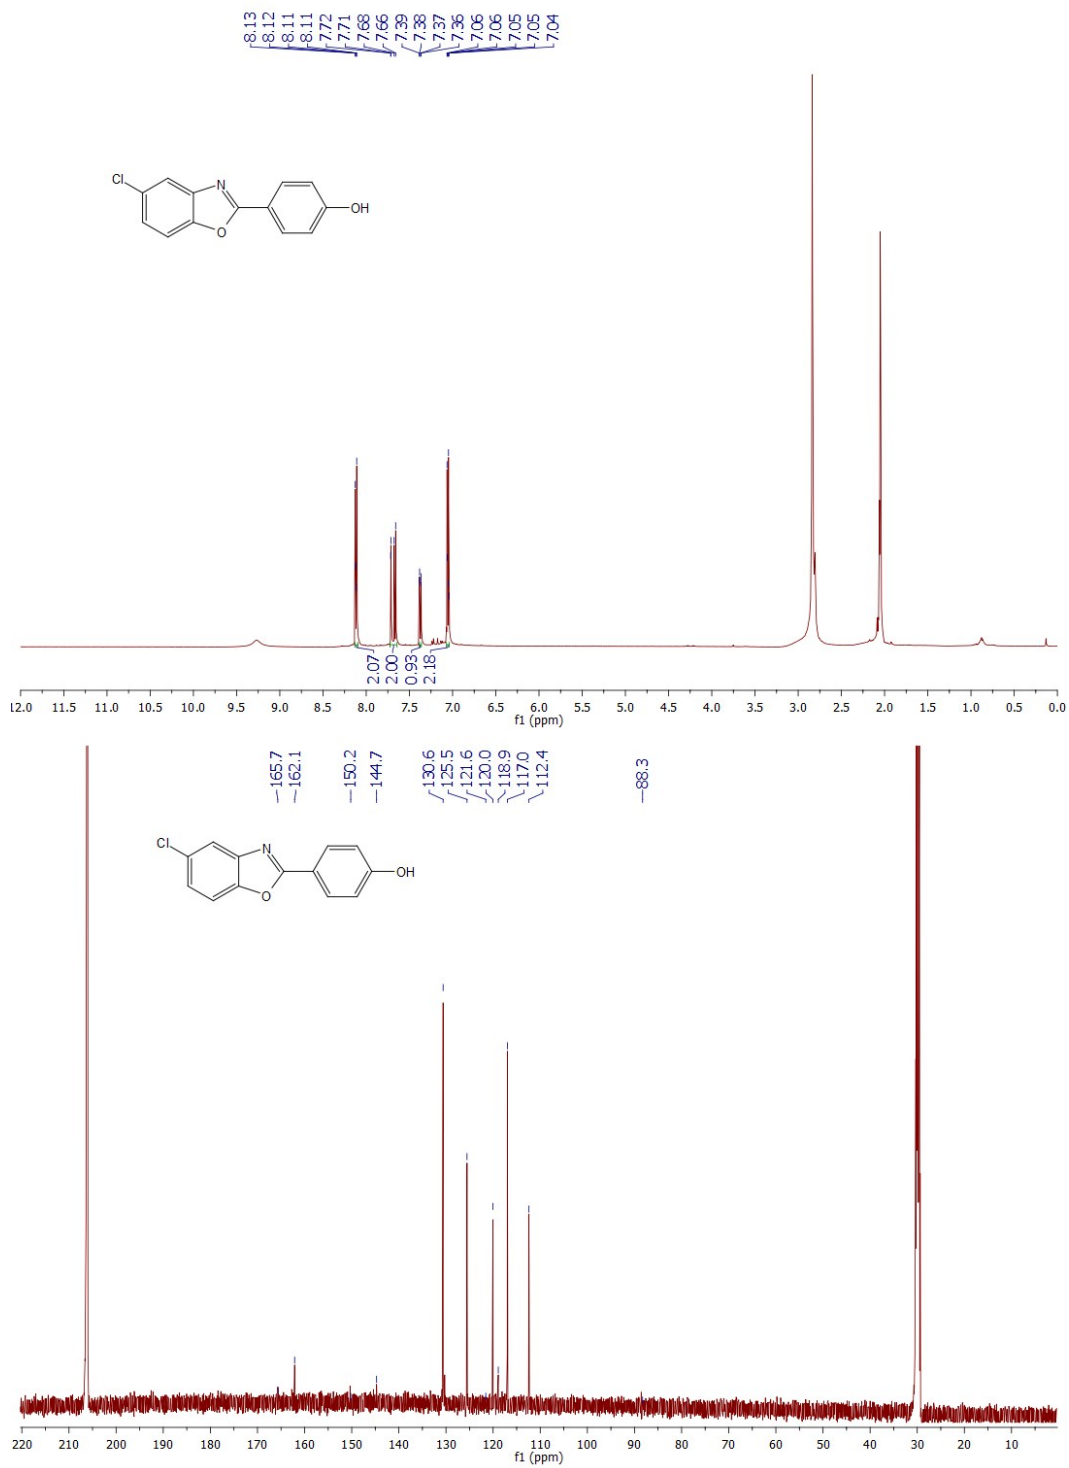

**Figure S30.** <sup>1</sup>H and <sup>13</sup>C NMR spectra of 5-chloro-2-(4-hydroxyphenyl)benzoxazole

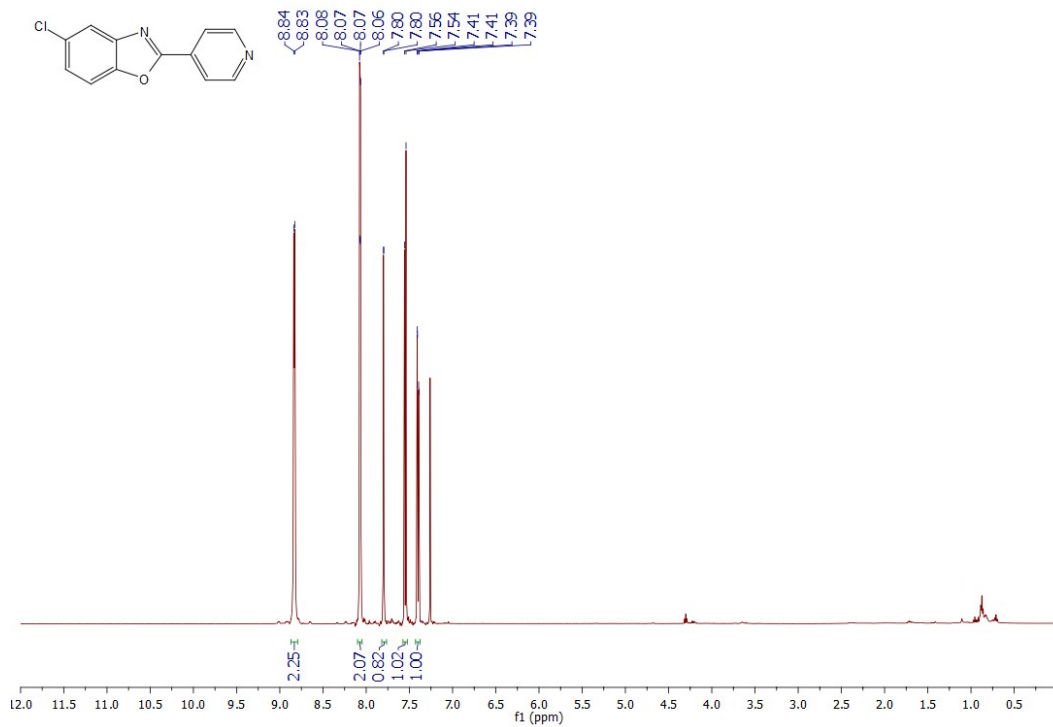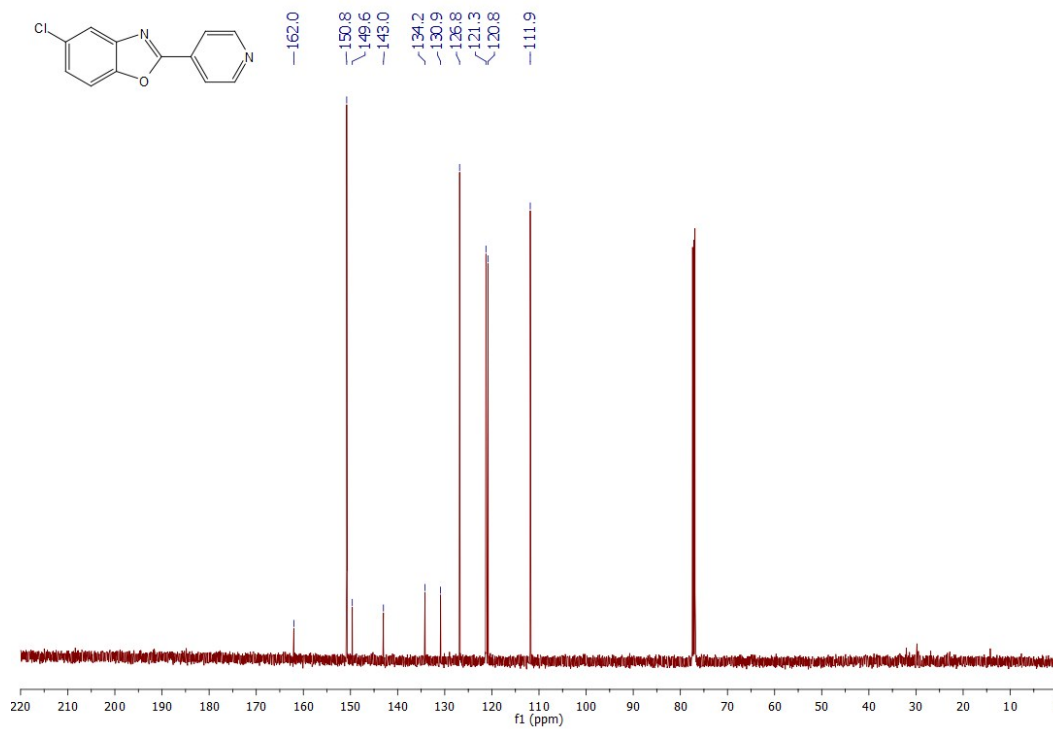

**Figure S31.**  $^1\text{H}$  and  $^{13}\text{C}$  NMR spectra of 5-chloro-2-(pyridin-4-yl)benzoxazole

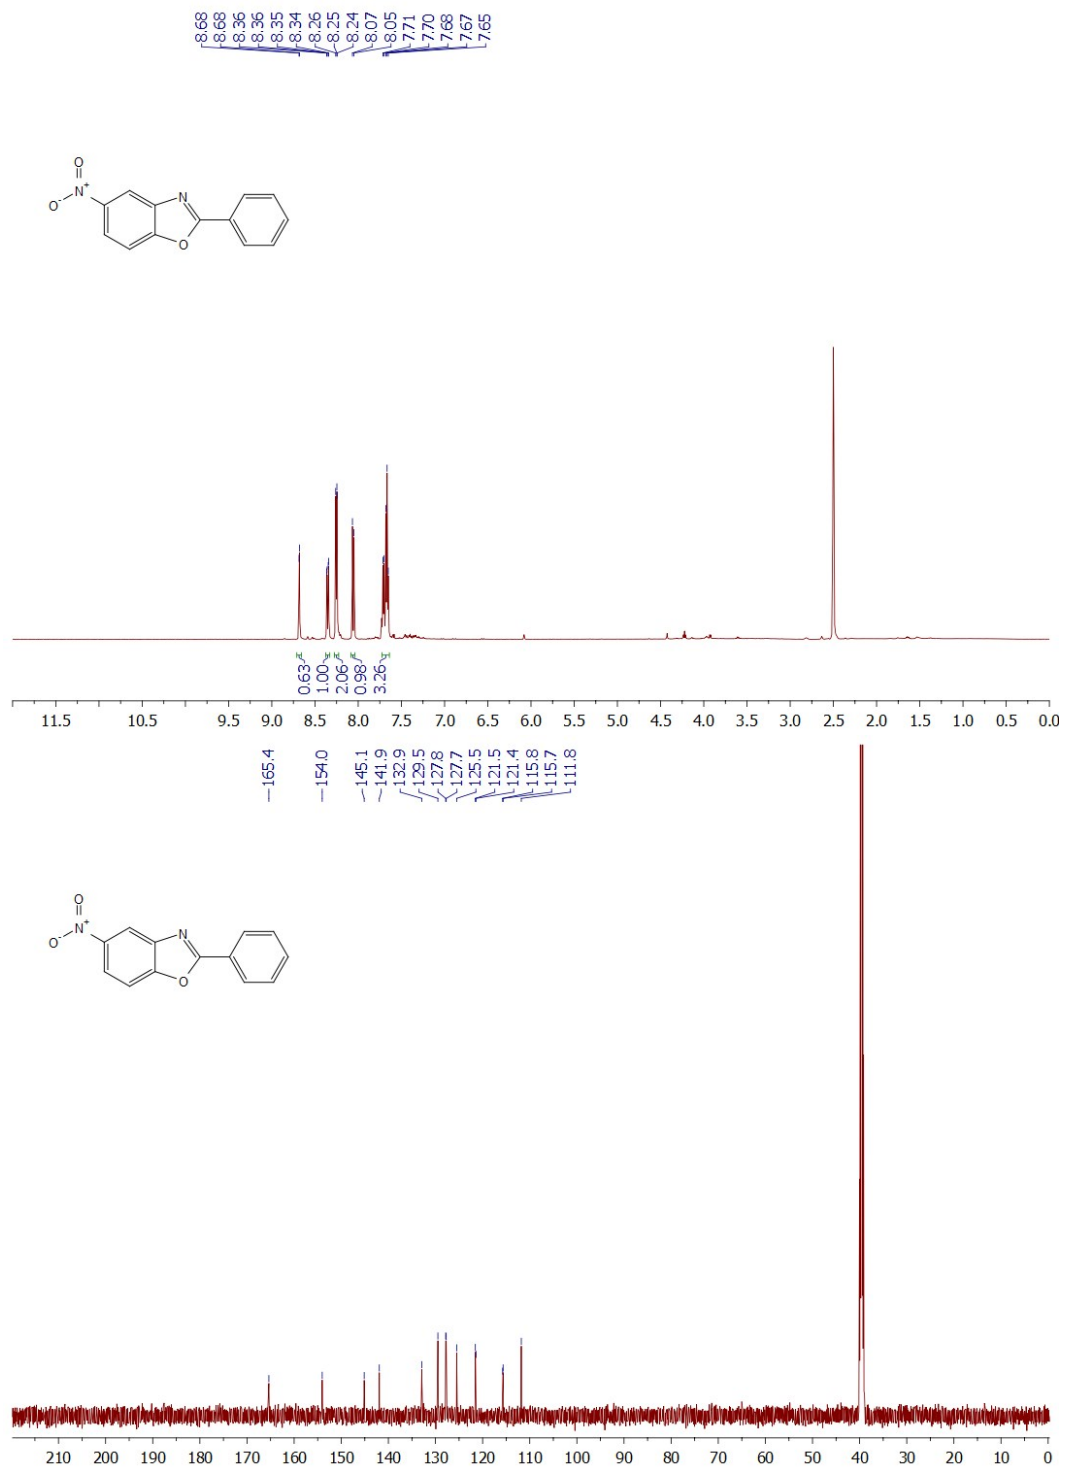

**Figure S32.** <sup>1</sup>H and <sup>13</sup>C NMR spectra of 5-nitro-2-phenylbenzoxazole

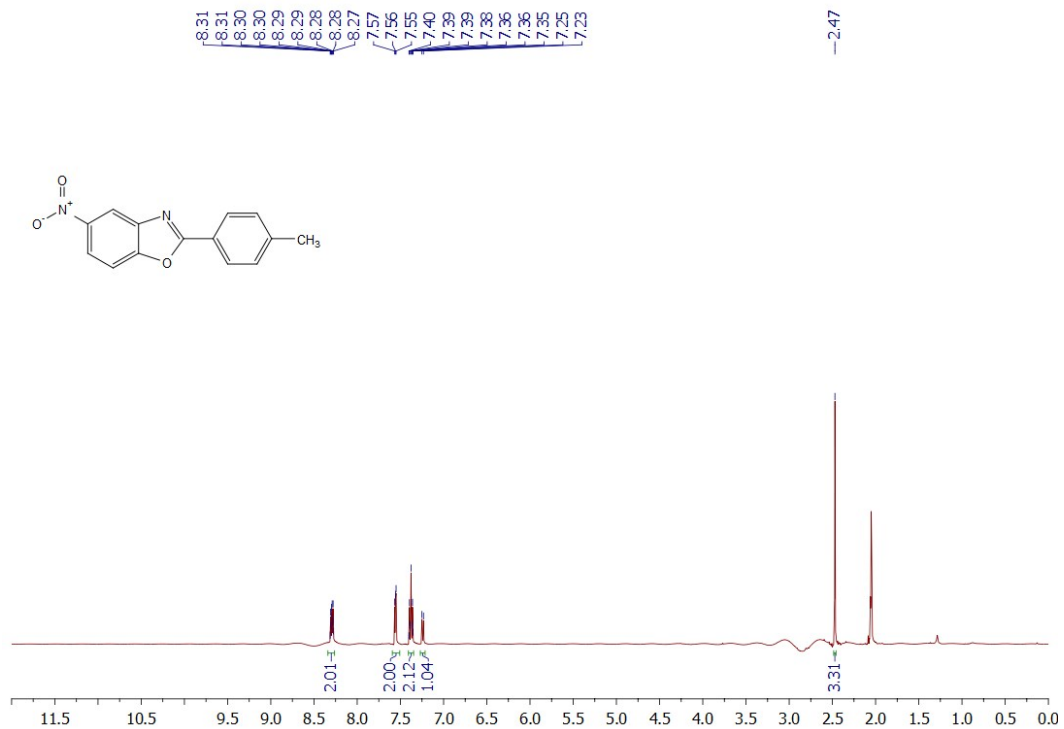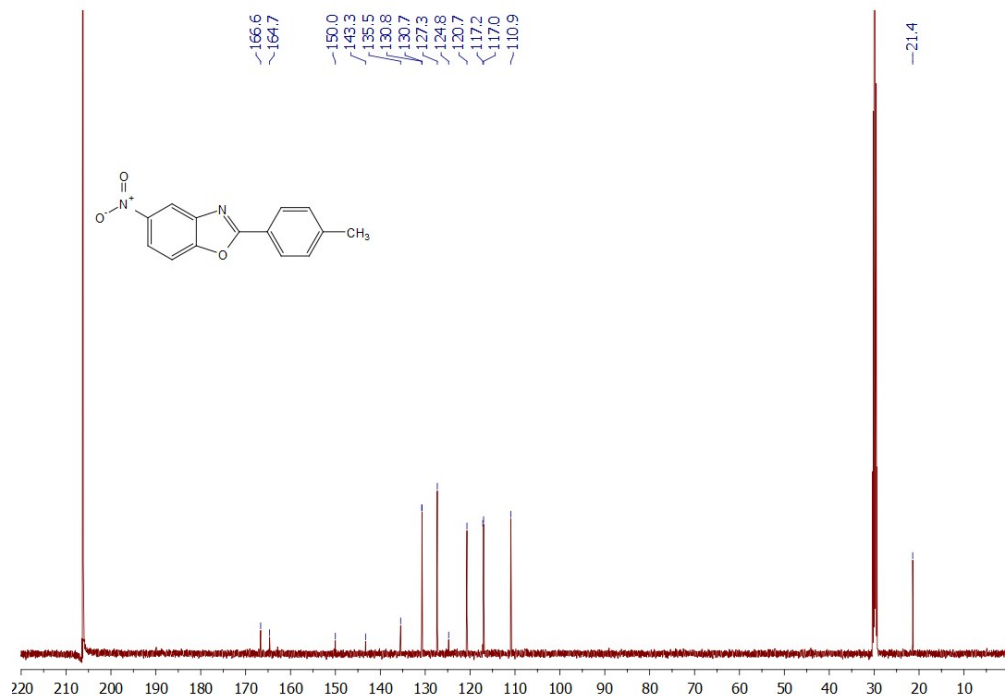

**Figure S33.** <sup>1</sup>H and <sup>13</sup>C NMR spectra of 5-nitro-2-(4-methylphenyl)benzoxazole

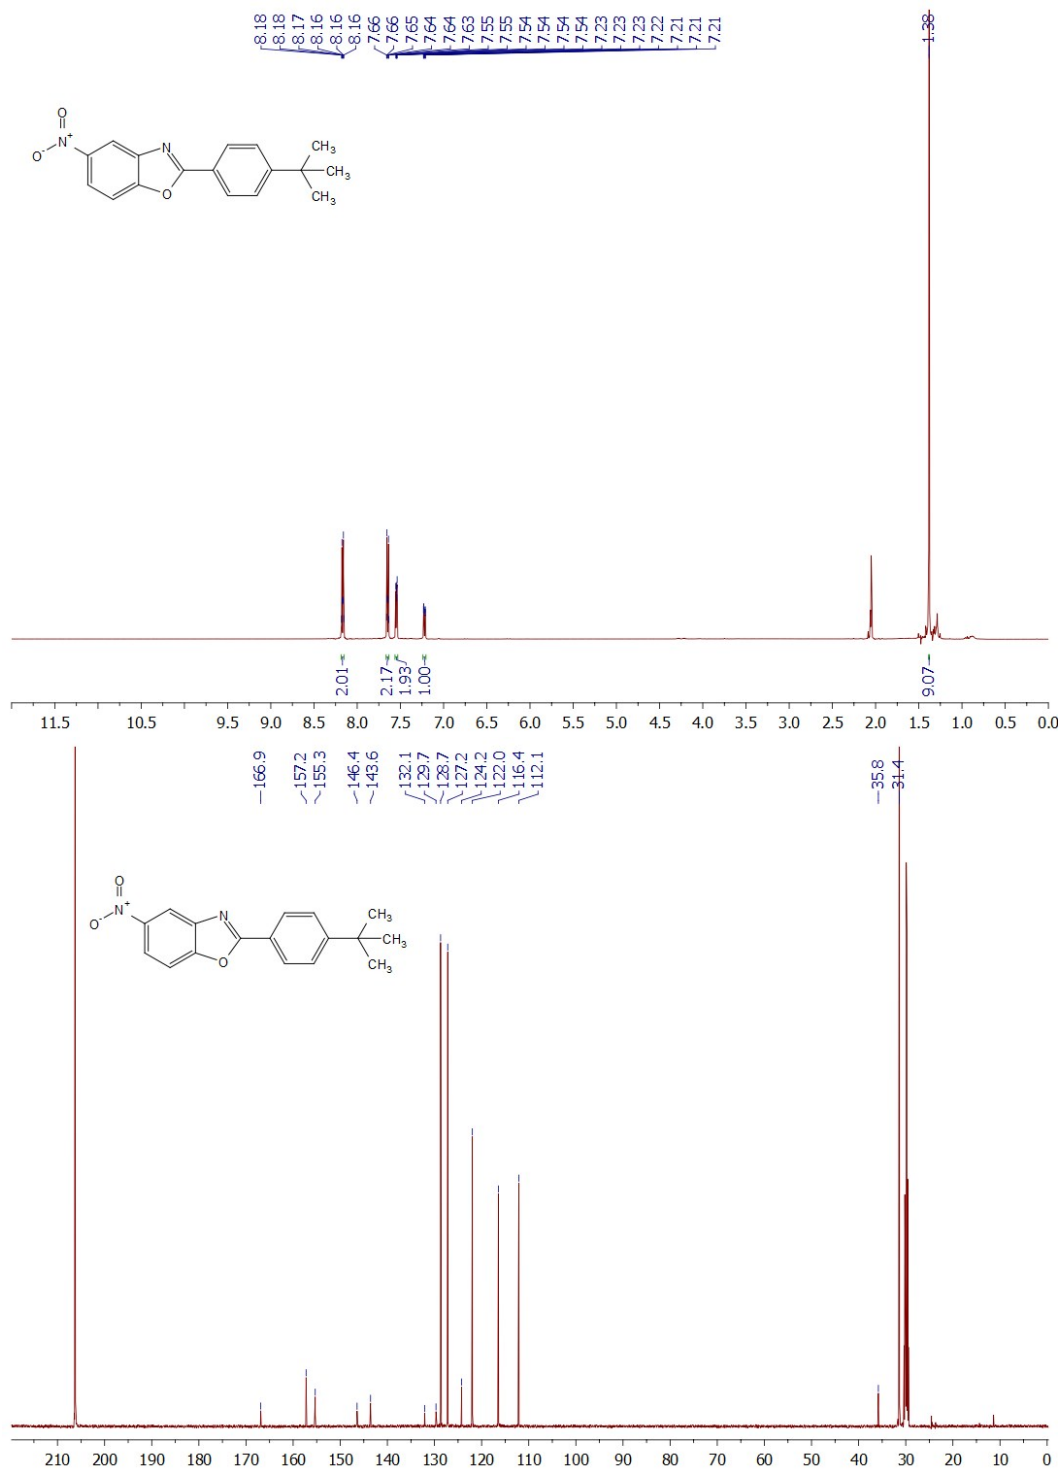

**Figure S34.** <sup>1</sup>H and <sup>13</sup>C NMR spectra of 5-nitro-2-(4-*tert*-butylphenyl)benzoxazole

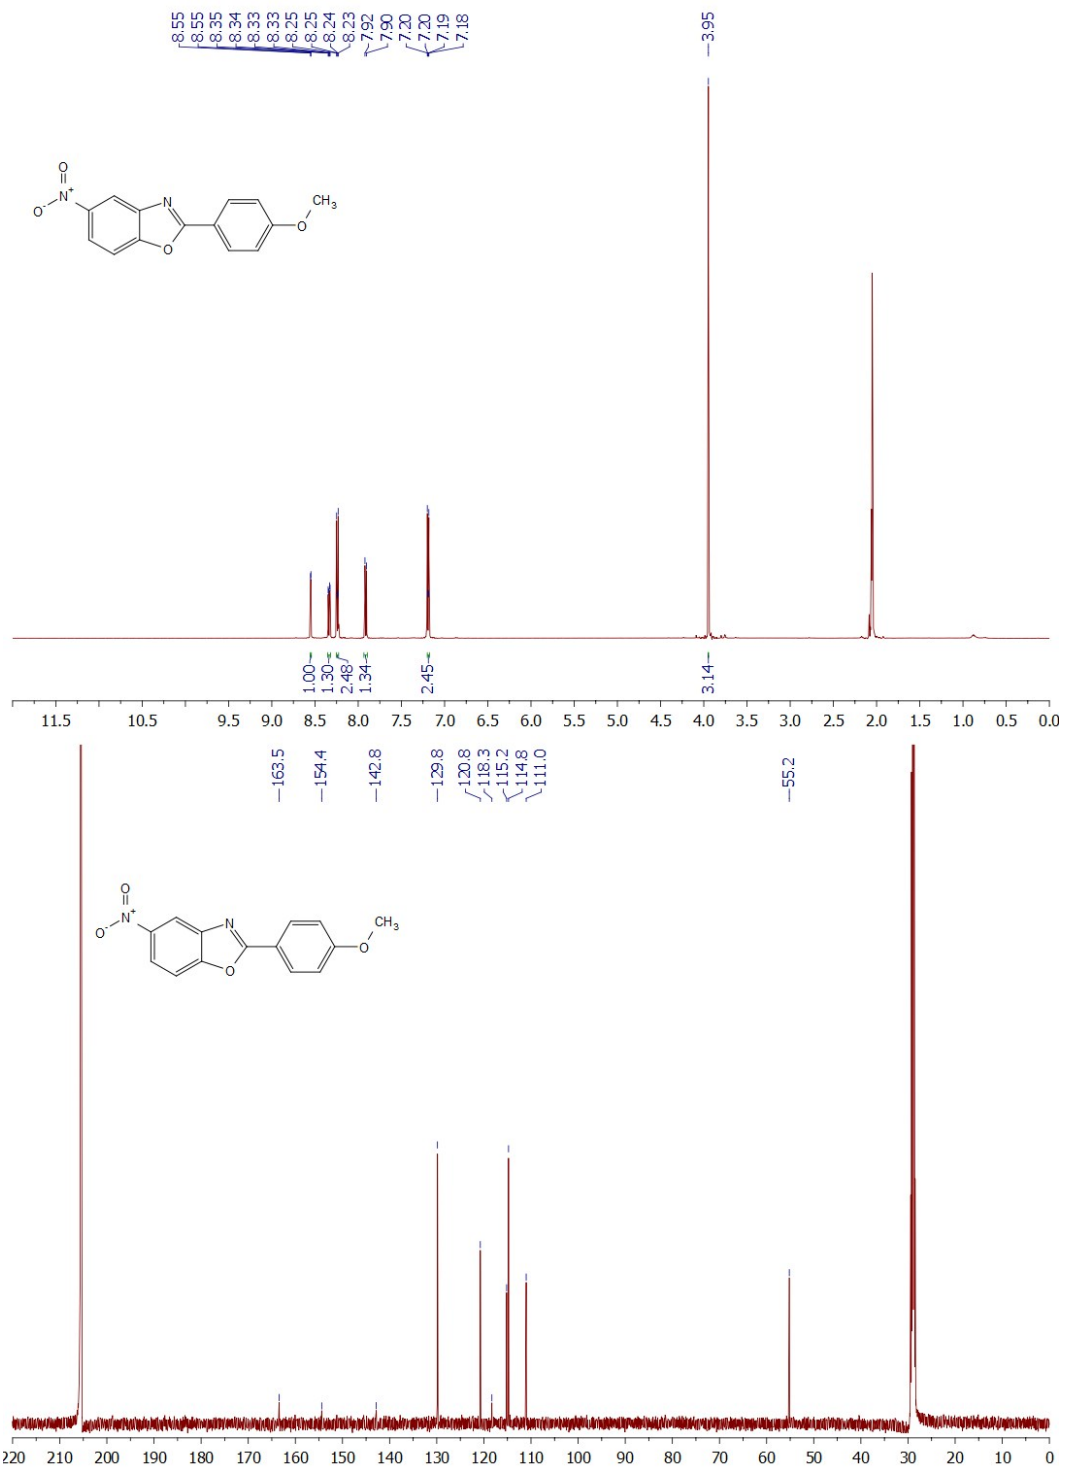

**Figure S35.** <sup>1</sup>H and <sup>13</sup>C NMR spectra of 5-nitro-2-(4-methoxyphenyl)benzoxazole

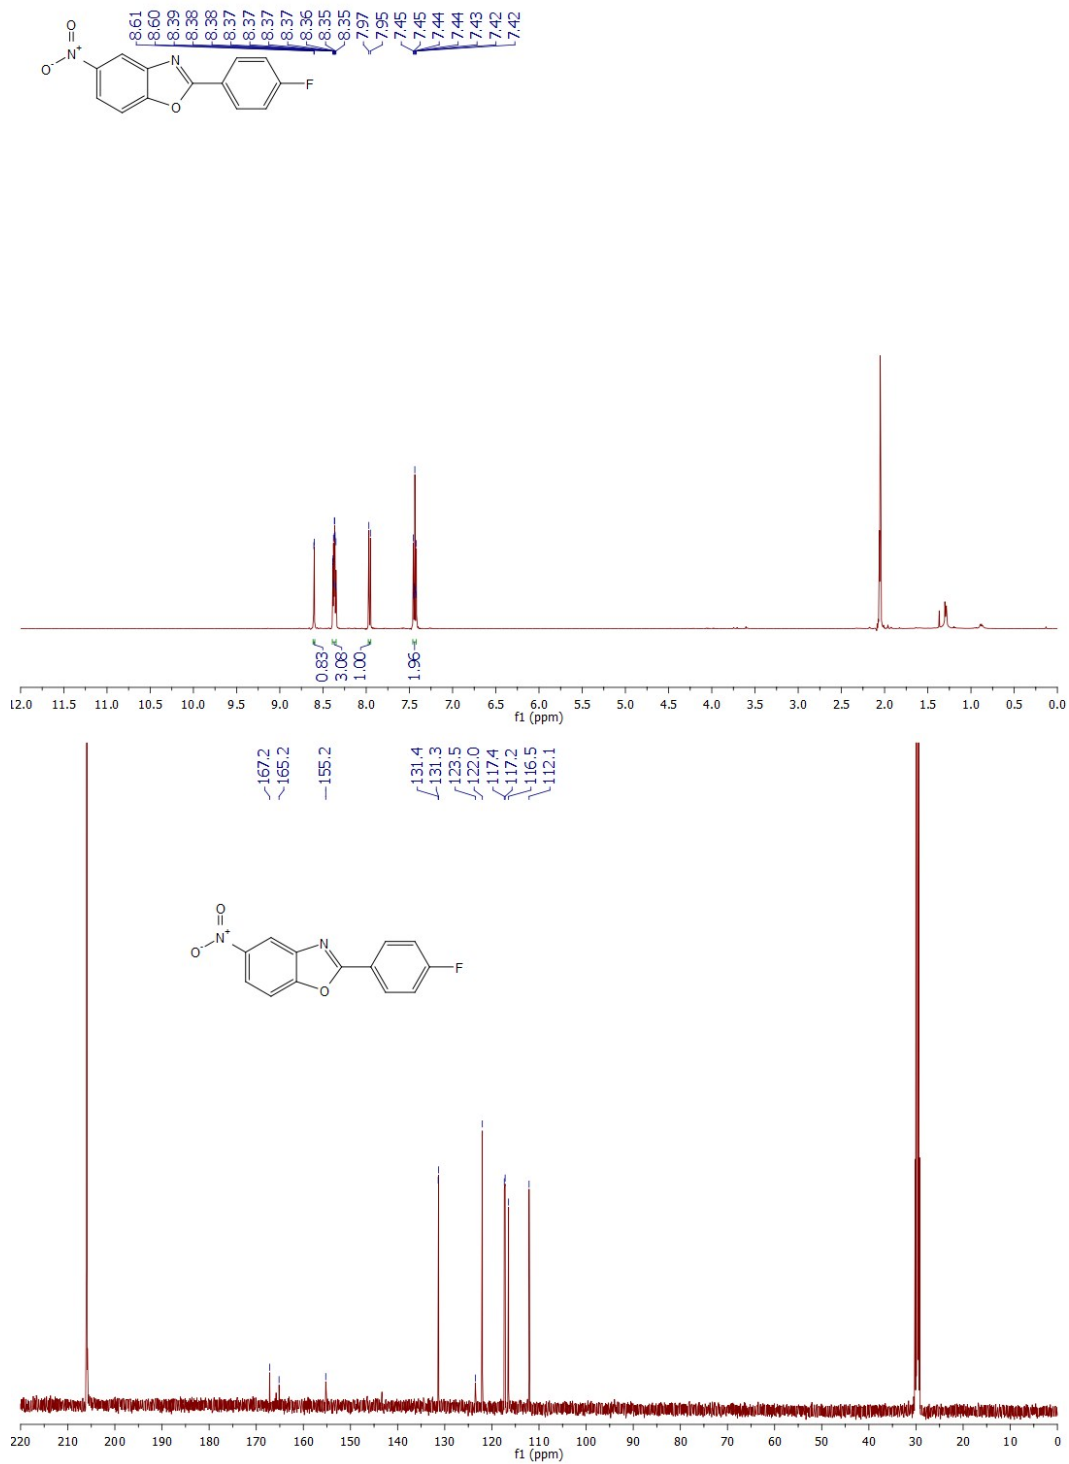

**Figure S36.** <sup>1</sup>H and <sup>13</sup>C NMR spectra of 5-nitro-2-(4-fluorophenyl)benzoxazole



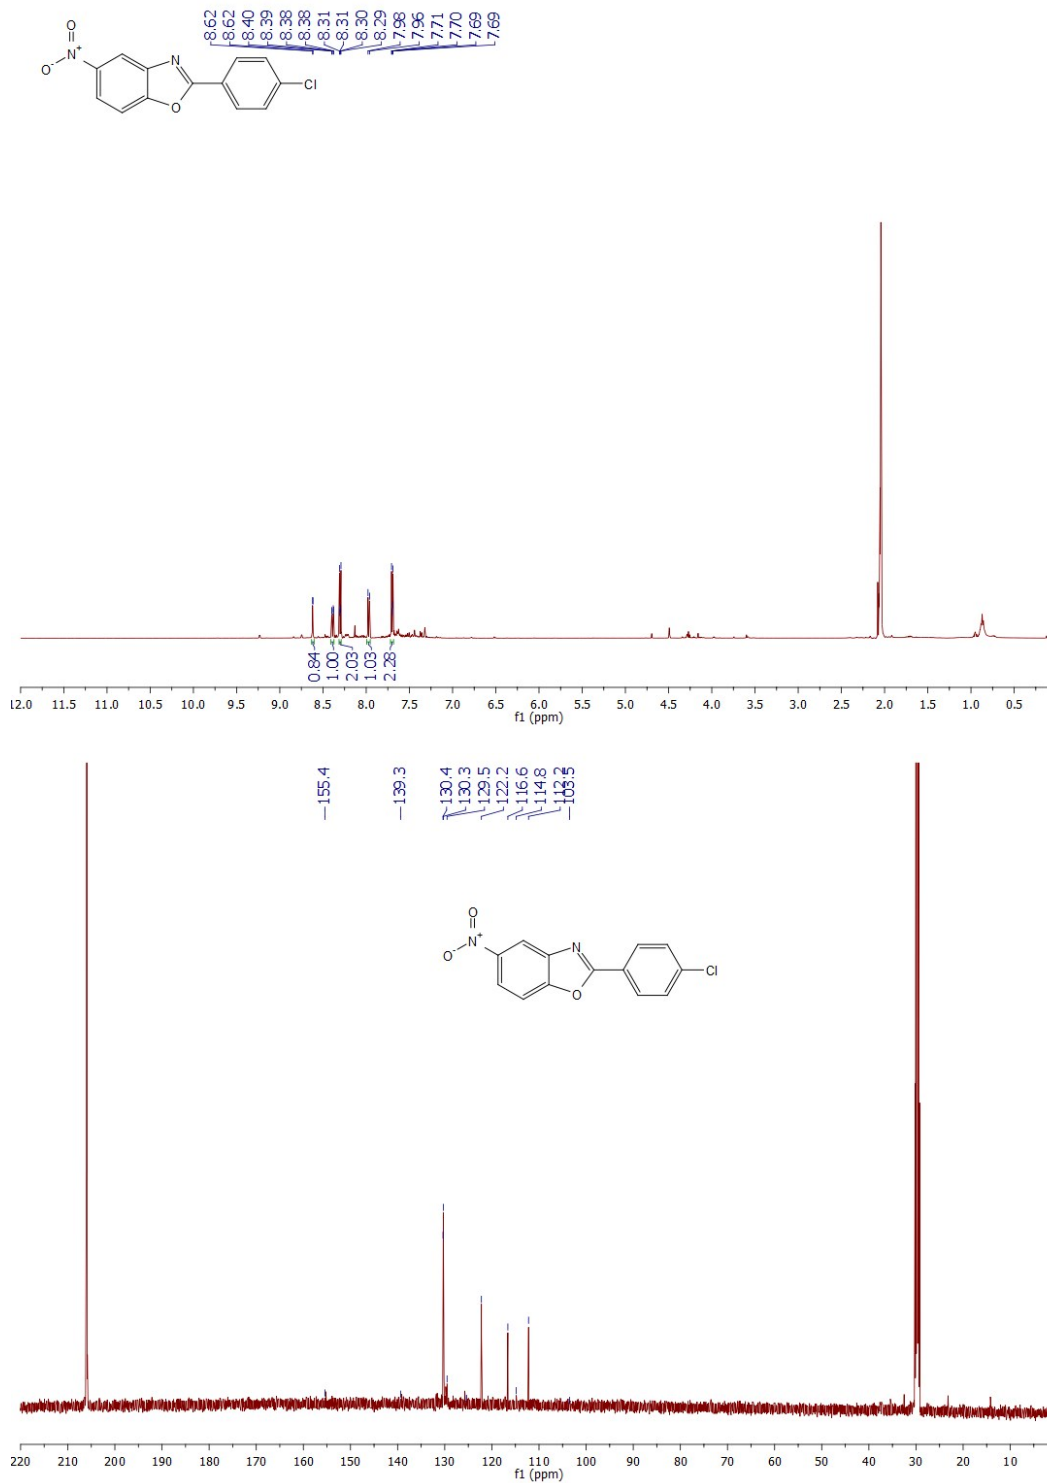

**Figure S37.** <sup>1</sup>H and <sup>13</sup>C NMR spectra of 5-nitro-2-(4-chlorophenyl)benzoxazole

## Characterization of 2-arylbenzothiazoles

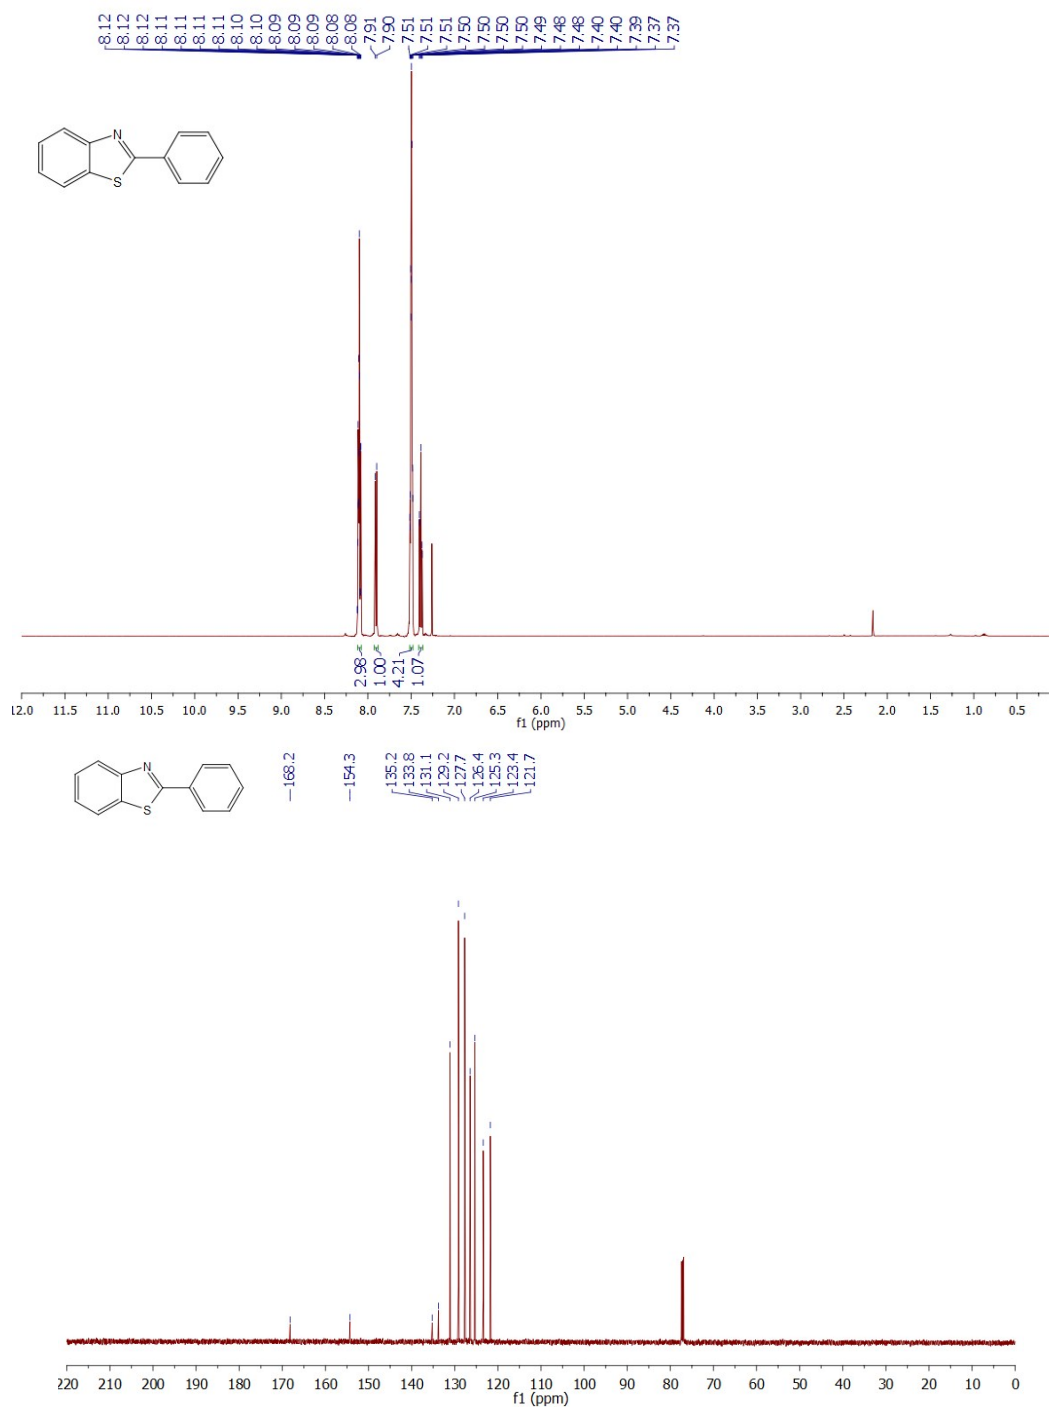

**Figure S38.** <sup>1</sup>H and <sup>13</sup>C NMR spectra of 2-phenylbenzothiazole

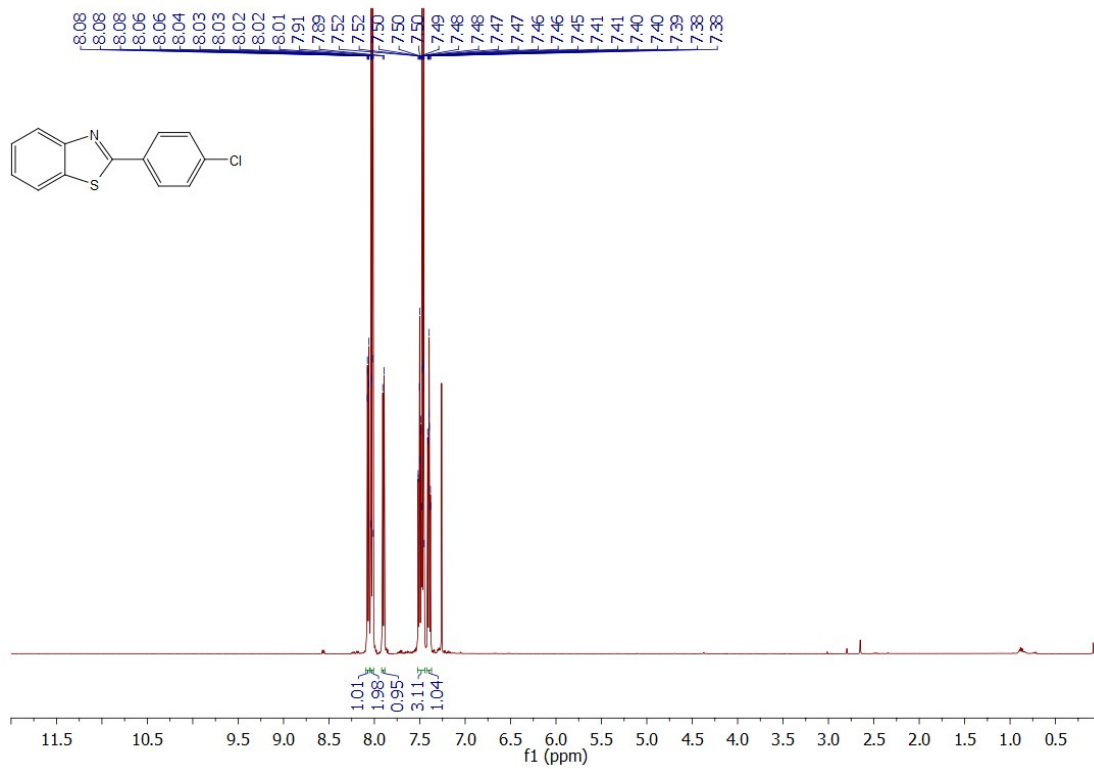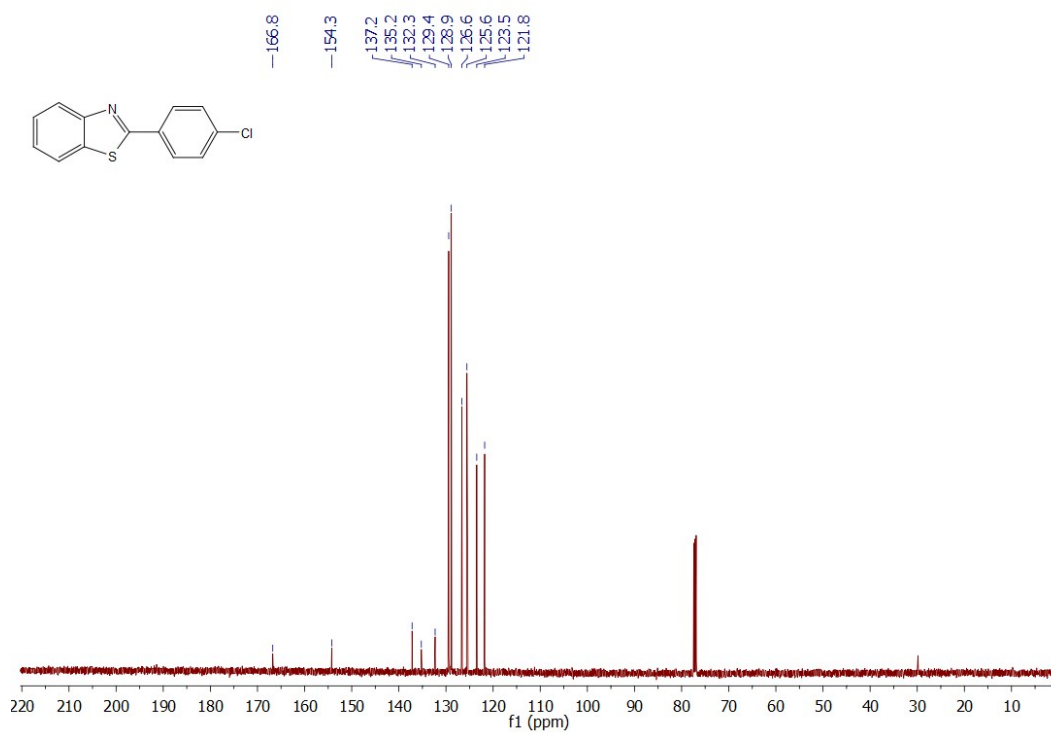

**Figure S39.**  $^1\text{H}$  and  $^{13}\text{C}$  NMR spectra of 2-(4-chlorophenyl)benzothiazole

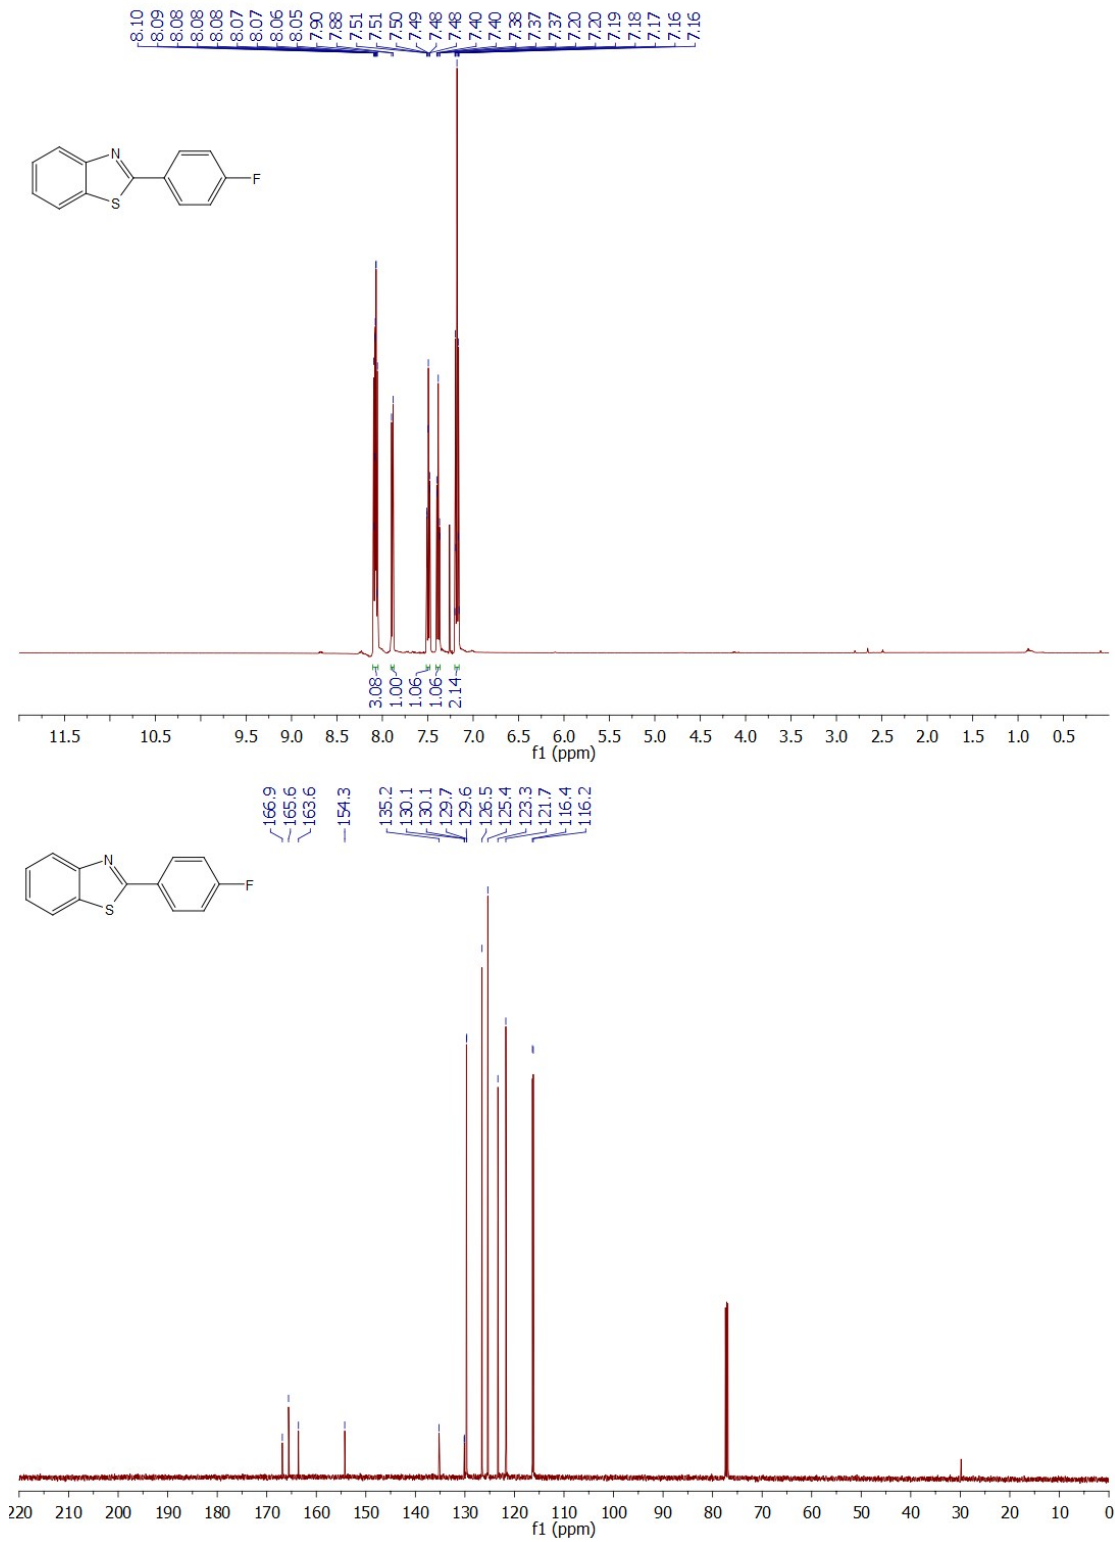

**Figure S40.** <sup>1</sup>H and <sup>13</sup>C NMR spectra of 2-(4-fluorophenyl)benzothiazole

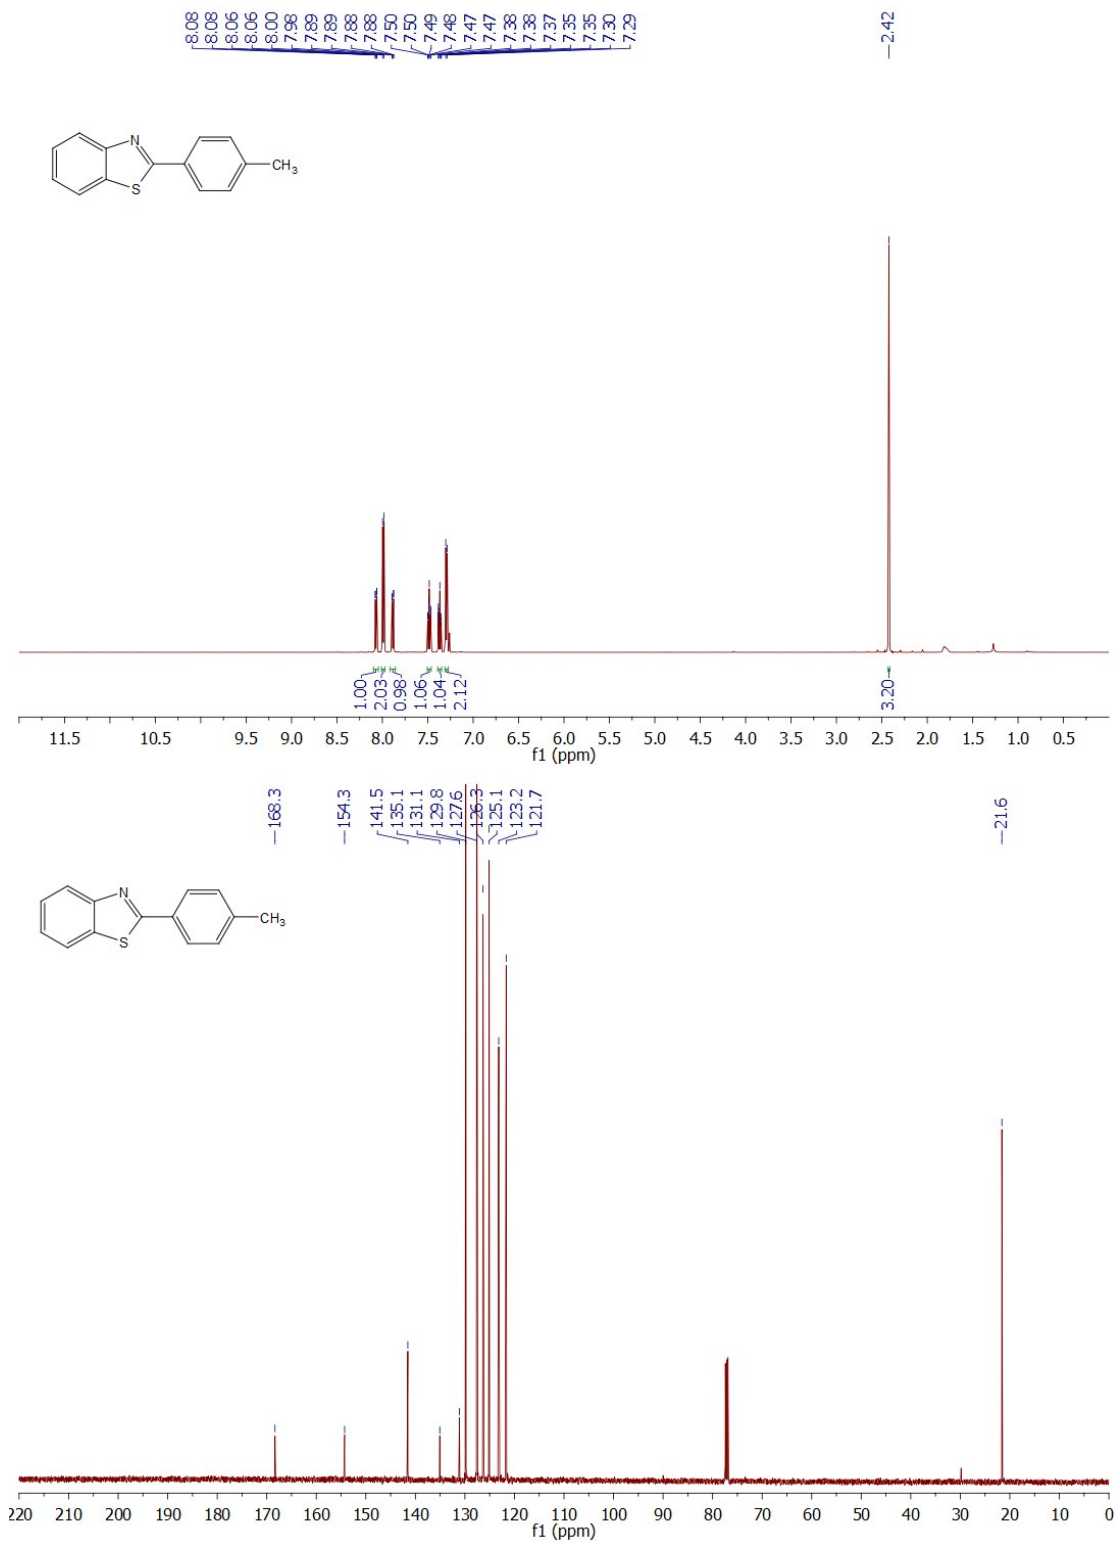

**Figure S41.** <sup>1</sup>H and <sup>13</sup>C NMR spectra of 2-(4-methylphenyl)benzothiazole

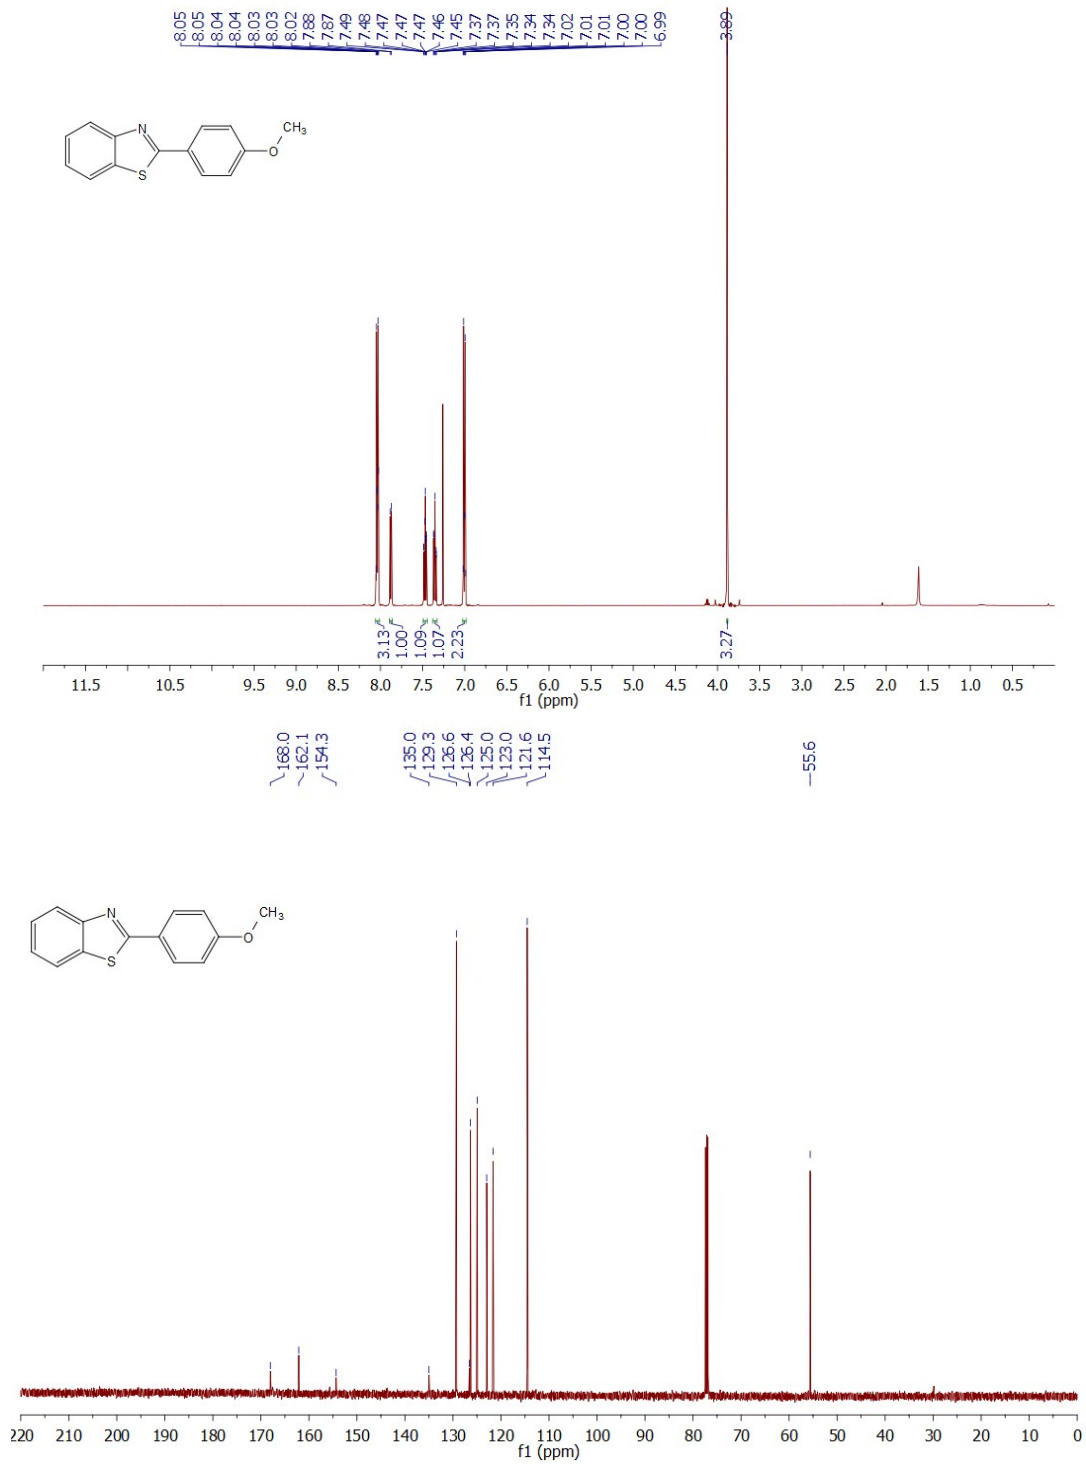

**Figure S42.** <sup>1</sup>H and <sup>13</sup>C NMR spectra of 2-(4-methoxyphenyl)benzothiazole

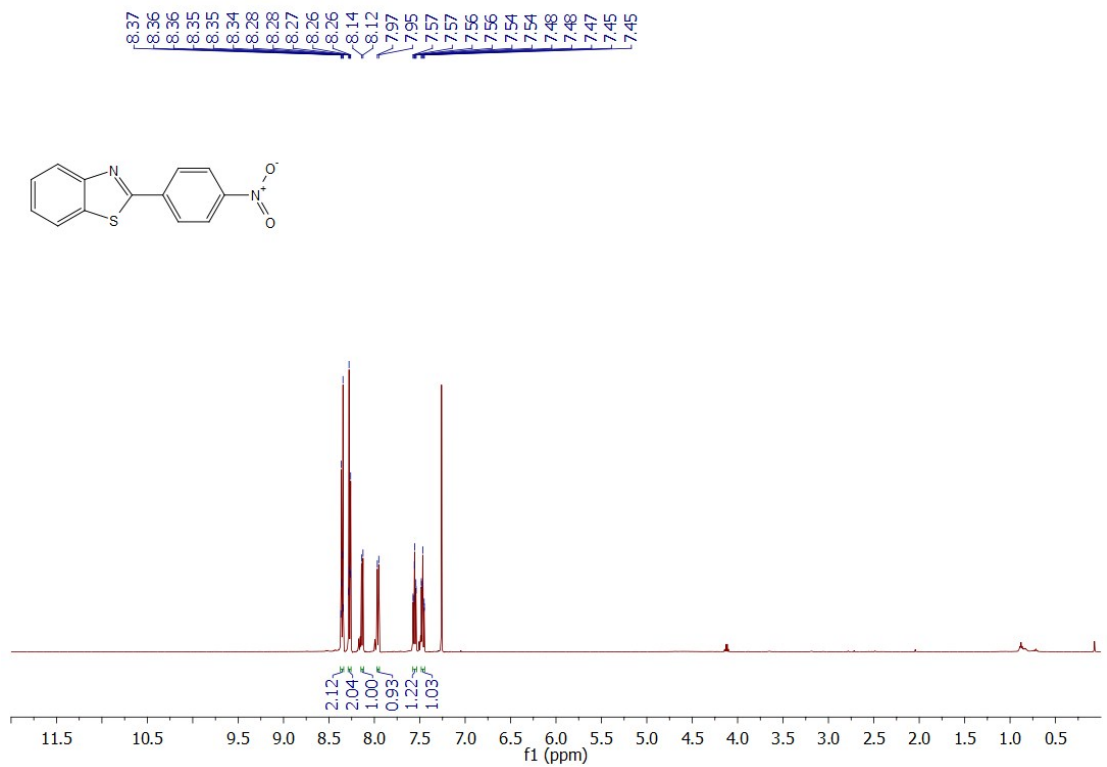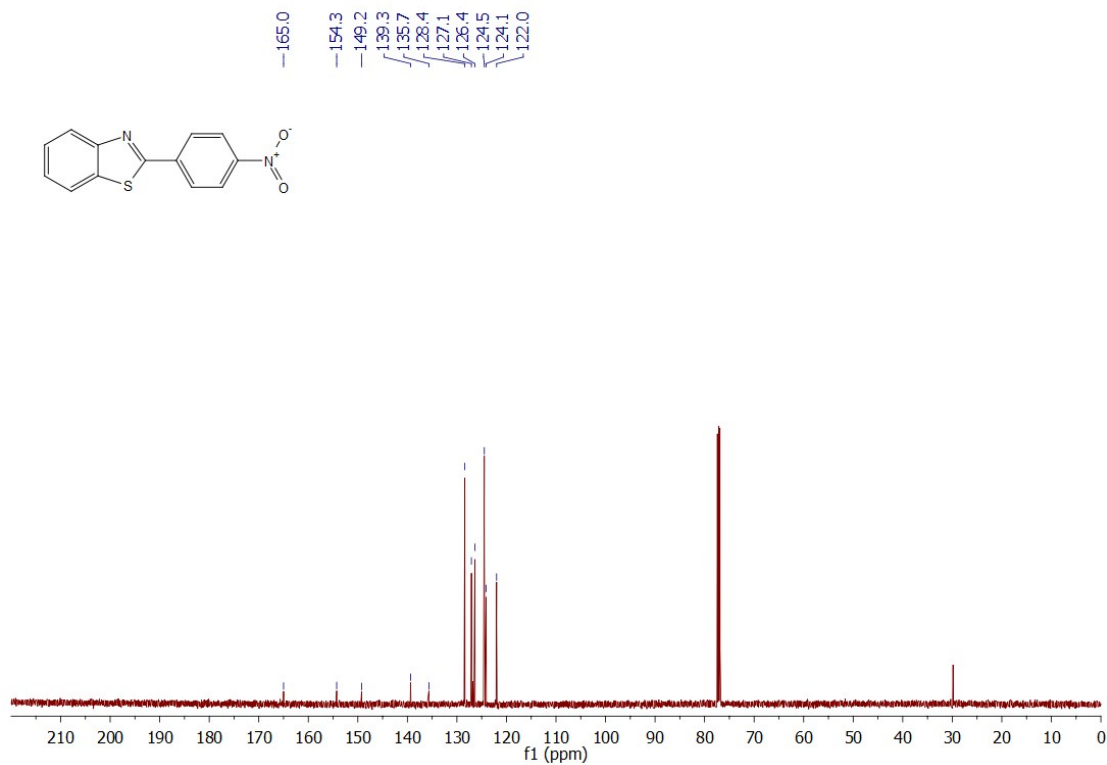

**Figure S43.** <sup>1</sup>H and <sup>13</sup>C NMR spectra of 2-(4-nitrophenyl)benzothiazole

## Characterization of 2-arylbenzimidazoles

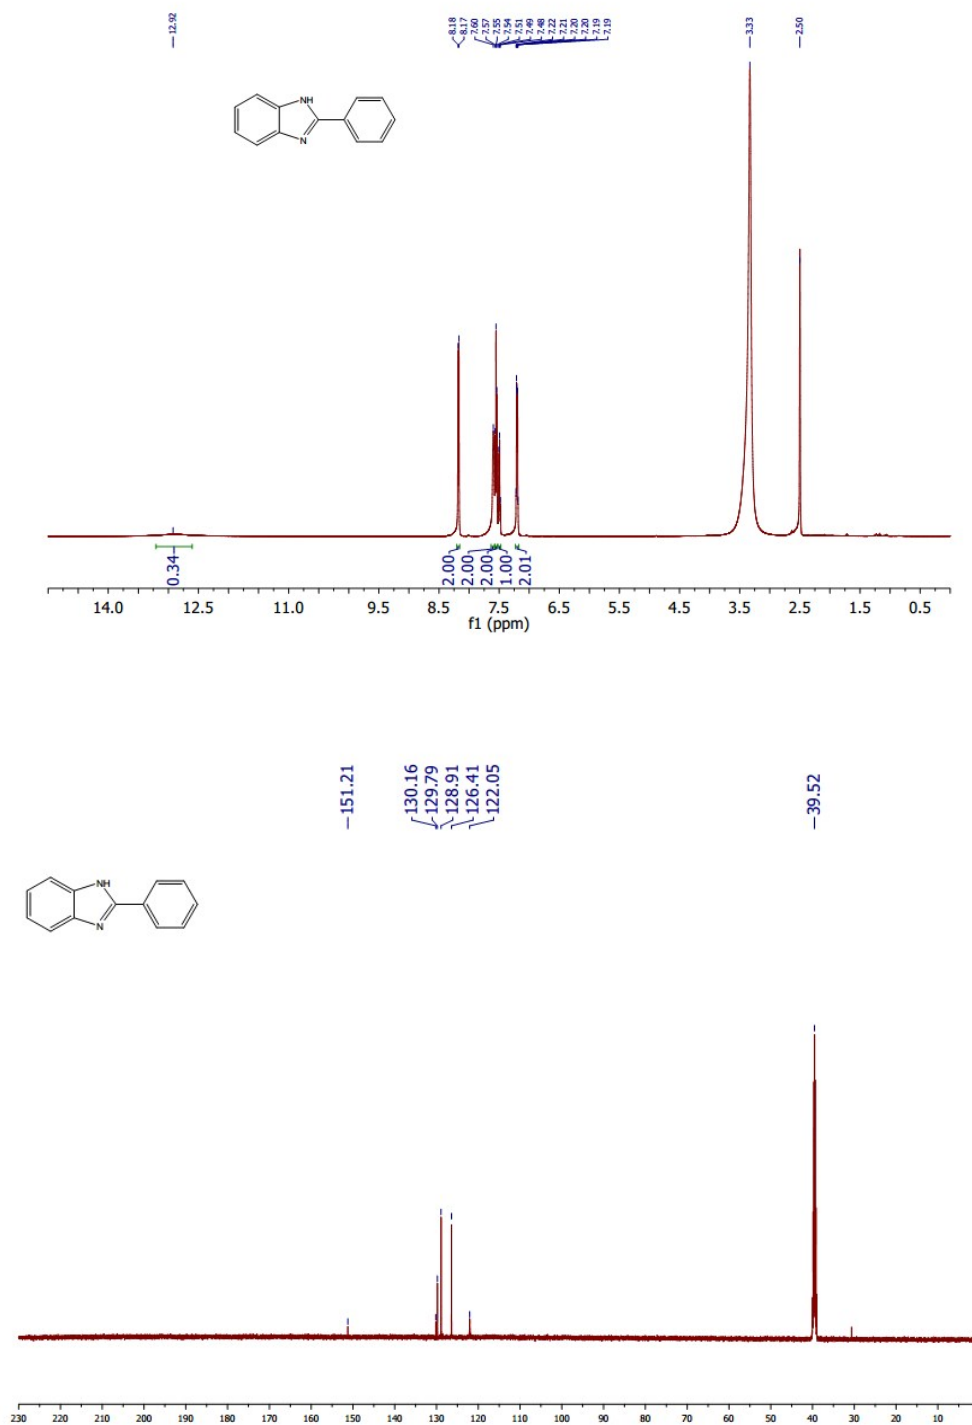

**Figure S44.** <sup>1</sup>H and <sup>13</sup>C NMR spectra of 2-phenylbenzimidazole.



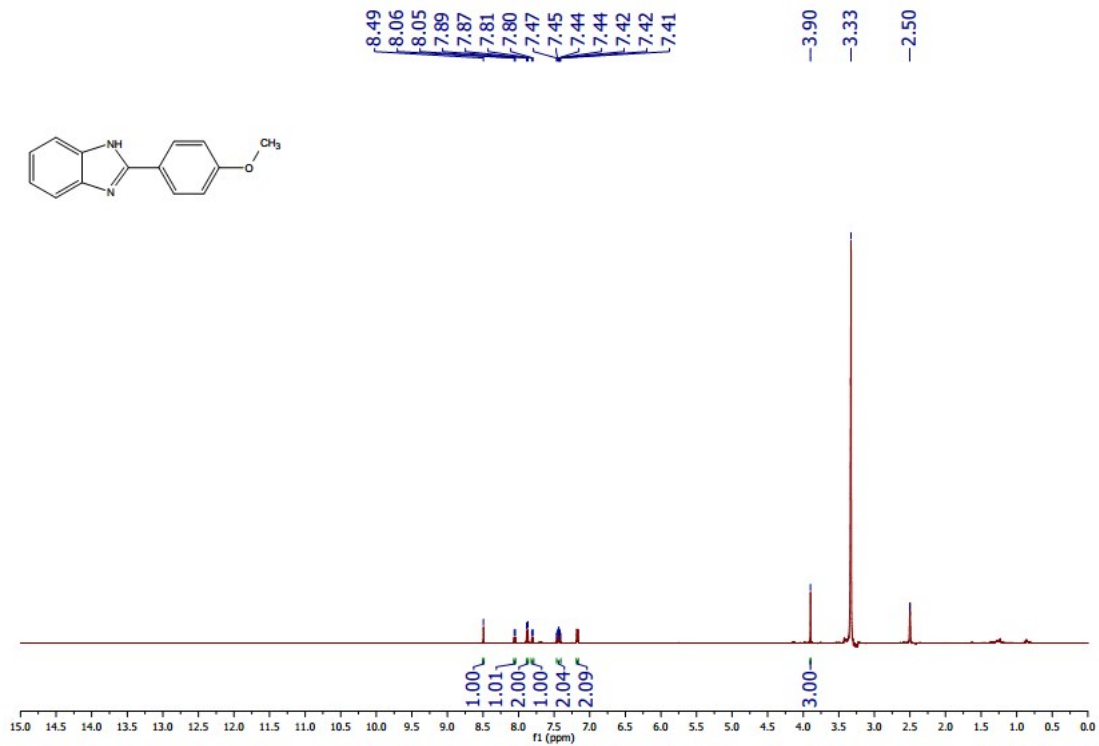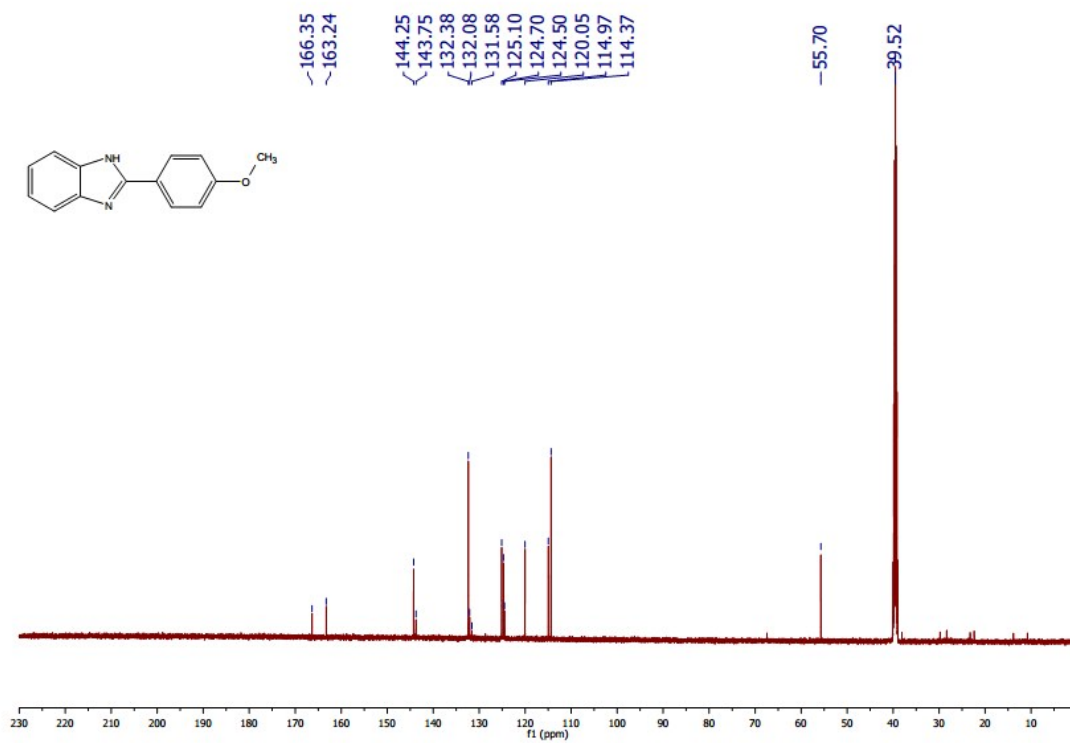

**Figure S45.** <sup>1</sup>H and <sup>13</sup>C NMR spectra of 2-(4-methoxyphenyl)benzimidazole.

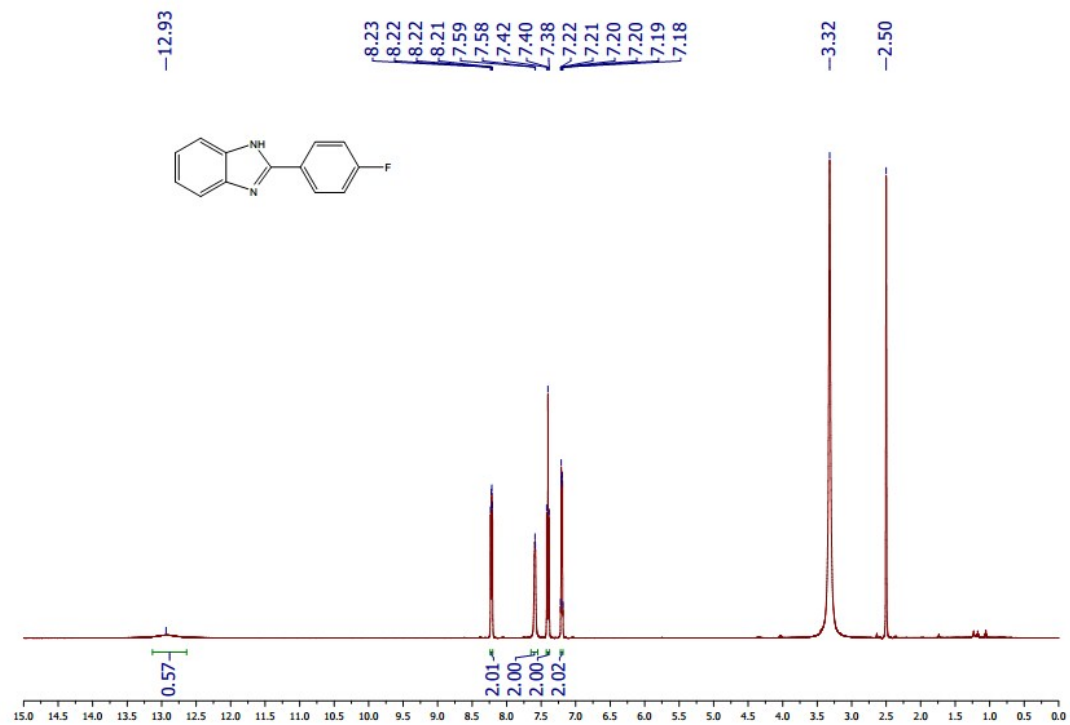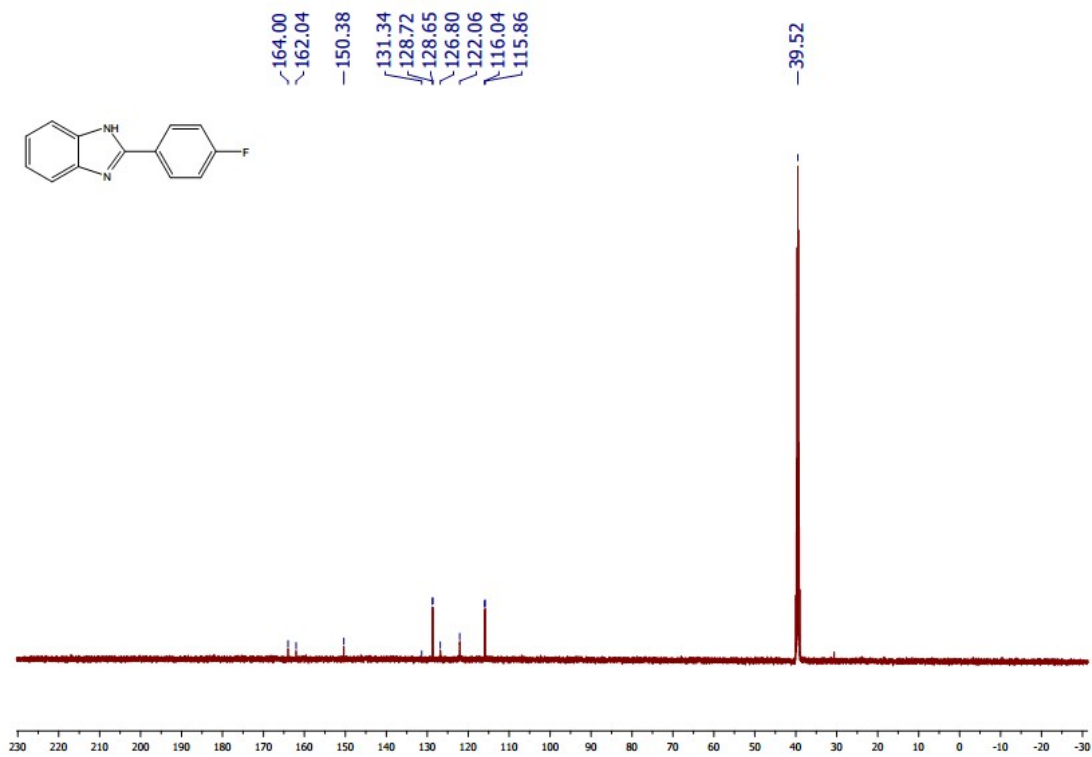

**Figure S46.** <sup>1</sup>H and <sup>13</sup>C NMR spectra of 2-(4-fluorophenyl)benzimidazole.

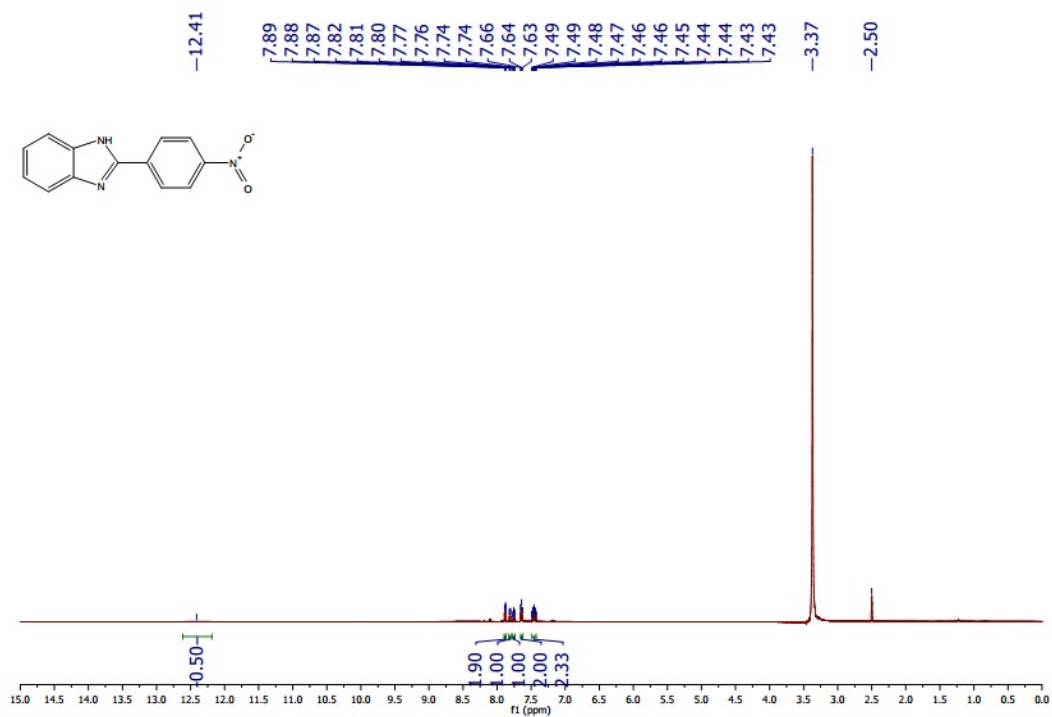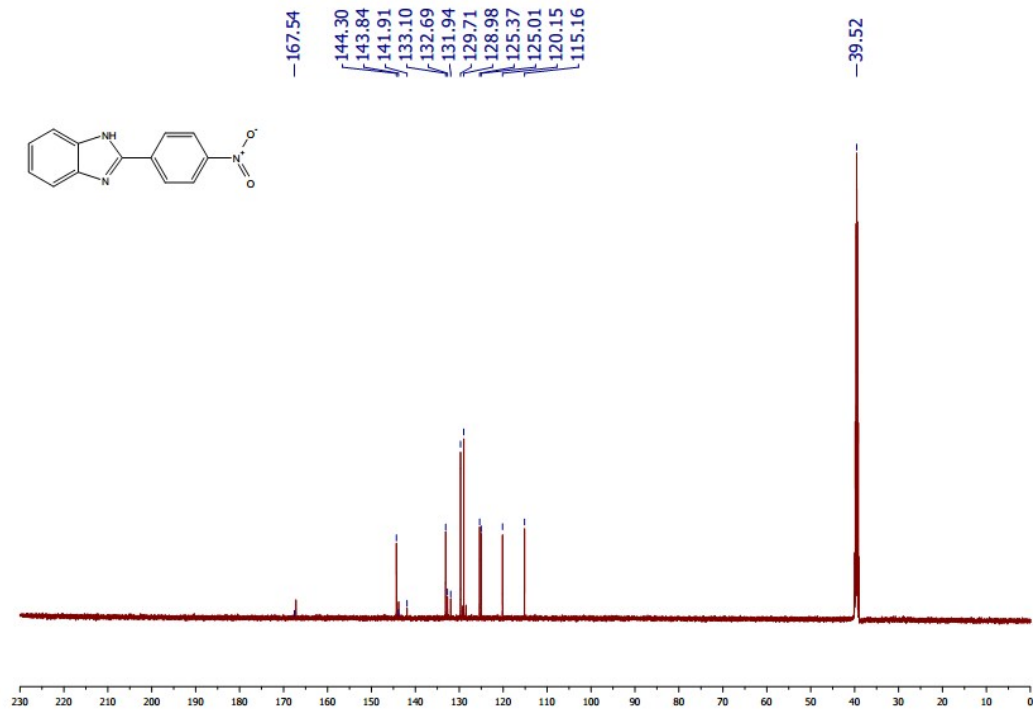

**Figure S47.** <sup>1</sup>H and <sup>13</sup>C NMR spectra of 2-(4-nitrophenyl)benzimidazole.

## Section S5.      References

1. Cole, A. C.; Jensen, J. L.; Ntai, I.; Tran, K. L. T.; Weaver, K. J.; Forbes, D. C.; Davis, J. *H. J. Am. Chem. Soc.* **2002**, *124*, 5962-5963.
2. Teo, Y. C.; Riduan, S. N.; Zhang, Y. *Green Chem.* **2013**, *15*, 2365-2368.
3. Tang, L.; Guo, X.; Yang, Y.; Zha, Z.; Wang, Z. *Chem. Commun. (Camb)* **2014**, *50*, 6145-6148.
4. Patil, M. R.; Bhanushali, J. T.; Nagaraja, B. M.; Keri, R. S. *C. R. Chimie* **2017**.
5. Azizian, J.; Torabi, P.; Noei, J. *Tetrahedron Lett.* **2016**, *57*, 185-188.
6. Zhou, Q.; Zhang, J. F.; Cao, H.; Zhong, R.; Hou, X. F. *J. Org. Chem.* **2016**, *81*, 12169-12180.
7. Gupta, R.; Sahu, P. K.; Sahu, P. K.; Srivastava, S. K.; Agarwal, D. D. *Catal. Commun.* **2017**, *92*, 119-123.
8. Wu, A.; Chen, Q.; Liu, W.; You, L.; Fu, Y.; Zhang, H. *Org. Lett.* **2017**.
9. Steinberg, D. F.; Turk, M. C.; Kalyani, D. *Tetrahedron* **2017**, *73*, 2196-2209.
10. Huang, L.; Zhang, W.; Zhang, X.; Yin, L.; Chen, B.; Song, J. *Bioorg. Med. Chem. Lett.* **2015**, *25*, 5299-5305.
11. Yamada, S.; Murakami, K.; Itami, K. *Org. Lett.* **2016**, *18*, 2415-2418.
12. Srivastava, A.; Shukla, G.; Singh, M. S. *Tetrahedron* **2017**, *73*, 879-887.
13. Reyes, H.; Beltran, H. I.; Rivera-Becerril, E. *Tetrahedron Lett.* **2011**, *52*, 308-310.
14. Prakash, O.; Batra, A.; Sharma, V.; Saini, R. K.; Verma, R. S. *J. Indian Chem. Soc.* **2003**, *80*, 1031-1034.
15. Vosoooghi, M.; Arshadi, H.; Saeedi, M.; Mahdavi, M.; Jafapour, F.; Shafiee, A.; Foroumadi, A. *J. Fluorine Chem.* **2014**, *161*, 83-86.
16. Yalçın, İ.; Şener, E.; Özden, T.; Özden, S.; Akın, A. *Eur. J. Med. Chem.* **1990**, *25*, 705-708.
17. Gao, Y.; Song, Q.; Cheng, G.; Cui, X. *Org. Biomol. Chem.* **2014**, *12*, 1044-1047.
18. Sharma, H.; Singh, N.; Jang, D. O. *Green Chem.* **2014**, *16*, 4922-4930.
